# Supplementary material
Source: PubMed Central journal article supplement (PMC3754789)
Supplement: NIHMS455766-supplement-Fig_S1-S9__Table_S1.pdf [file NIHMS455766-supplement-Fig_S1-S9__Table_S1.pdf]

## Materials and Methods

### Mice

TCR<sub>GAG</sub> Rag2<sup>-/-</sup>, Alb:GAG Rag2<sup>-/-</sup>, [TCR<sub>GAG</sub> Rag2<sup>-/-</sup> x Alb:GAG Rag2<sup>-/-</sup>]F1, Alb:GAG Thy.1.1, TCR<sub>GAG</sub> Thy1.1 mice have been described previously (6-8). C57BL/6 (B6) and Thy1.1 mice were purchased from The Jackson Laboratory. *Il15*<sup>-/-</sup> mice were provided by Murali-Krishna Kaja. *Il15*<sup>-/-</sup> mice were crossed to Alb:GAG Thy1.1 mice in our animal facility to generate Alb:GAG *Il15*<sup>-/-</sup> Thy1.1 mice. Lymphopenia was induced by sublethal total body irradiation (TBI; 5.0 or 5.5Gy). The neutralizing mouse anti-IL7 monoclonal antibody (M25) was a kind gift from Amgen. The antibody was administered intraperitoneally (i.p.) to lymphopenic Alb:GAG *Il15*<sup>-/-</sup> Thy1.1 mice at 1mg per mouse at 2-day intervals. The treatment was initiated at the day of radiation and continued till termination of the experiment as indicated. All mice were bred and maintained in a specific pathogen-free barrier facility at the University of Washington. Experiments were performed in compliance with the University of Washington Institutional Animal Care and Use Committee regulations.

### Antibodies and reagents

The FMuLV GAG peptide (CCLCLTVFL) was purchased from Pi Proteomics. The H2-<sup>b</sup>D/GAG-tetramer was synthesized by the Immune Monitoring Core at the Fred Hutchinson Cancer Research Center. The fluorochrome-conjugated antibodies were purchased from BD Biosciences, eBioscience and Biolegend.

## **Flow cytometric analysis**

Flow cytometric analysis was performed using FACSCanto and LSRII; cells were sorted using BD FACS Aria (BD Biosciences, San Jose, CA) at the Cell Analysis Facility, Department of Immunology, University of Washington. Flow data were analyzed with FlowJo7.6 (Tree Star Inc, Ashland, OR).

## **Listeria infection**

*Listeria monocytogenes*  $\Delta actA$ ,  $\Delta inlB$  strains expressing the FMuLV GAG epitope (CCLCLTVFL) (LM-GAG) or a control vector (LM-Ø) were provided by Cerus Corporation. *L. monocytogenes* was grown in Brain-Heart Infusion broth (Sigma). At a midlog growth phase, culture samples were measured by OD and diluted in PBS for the desired titer; mice were infected i.p. with  $3 \times 10^7$  cfu of LM-GAG or LM-Ø.

## **Adoptive T cell transfers and generation of memory T cells**

Tolerant CD8<sup>+</sup> T cells were isolated from spleens of [TCR<sub>GAG</sub> Rag2<sup>-/-</sup> x Alb:GAG Rag2<sup>-/-</sup>]F1 (Tolerant) mice. Unless otherwise stated, tolerant T cells were sorted for CD8/CD44<sup>hi</sup> expression and adoptively transferred (i.v.) into normal hosts or sublethally irradiated, lymphopenic hosts one day post radiation. TCR<sub>GAG</sub> memory cells were generated by transfer of  $1 \times 10^6$  naïve TCR<sub>GAG</sub> CD8 T cells (Thy1.1) into congenically-marked B6 (Thy1.2) hosts, followed by i.p. infection one day later with  $3 \times 10^7$  cfu LM-GAG. Splenic CD44<sup>hi</sup>/CD62L<sup>hi</sup> memory TCR<sub>GAG</sub> T cells were sorted at least two months post infection.

## **BrdU labeling**

Beginning 72 hours before analysis, 1mg BrdU (BD Biosciences) was injected i.p. into each mouse every 24 hours for 3 doses. Splenocytes were then analyzed for BrdU incorporation.

Intracellular BrdU staining was performed using APC BrdU Flow Kit (BD Biosciences) as per manufacturer's protocol.

### **Degranulation assay, intracellular cytokine staining and CFSE labeling**

Intracellular cytokine staining was performed using the Cytotfix/Cytoperm Plus kit (BD Biosciences) per the manufacturer's instructions. Briefly, approximately  $10^5$  naïve, tolerant, memory, rescued or re-tolerized TCR<sub>GAG</sub> CD8<sup>+</sup> T cells were mixed with  $10^6$  congenically marked splenocytes and incubated with 1µg/ml GAG peptide for 5 h at 37°C in the presence of GolgiPlug (brefeldin A). After staining for cell-surface molecules, the cells were fixed, permeabilized, and stained with antibodies to IFN-γ (XMG1.2) and TNF-α (MP6-XT22).

For measurement of cell proliferation *in vivo*, tolerant TCR<sub>GAG</sub> CD8<sup>+</sup> T cells were incubated with 10 µM carboxyfluorescein succinimidyl ester (CFSE; Invitrogen) in serum-free HBSS for 15 min at 37°C. The reaction was quenched with pure FCS and the cells were washed twice with serum-free medium before transfer into indicated hosts.

### **Microarray sample preparation (mRNA and miRNA)**

For mRNA array: Replicate samples were isolated from spleens and sorted as follows: naïve (n=3; CD8/CD44<sup>lo</sup>), tolerant (n=3; CD8/CD44<sup>hi</sup>), central memory (n=3; CD8/CD90.1/CD44<sup>hi</sup>/CD62L<sup>hi</sup>, >60 days post infection), rescued (n=4; CD8/CD90.2, 22 days post transfer into lymphopenic Alb:GAG Thy.1.1 hosts) and re-tolerized (n=2; CD8/CD90.2, >3-4 months post transfer into lymphopenic B6 Thy.1.1 hosts) TCR<sub>GAG</sub> CD8<sup>+</sup> T cells. After sort, cells were washed twice with cold PBS and cell pellets were frozen and stored at -80°C until all samples were collected. RNA was isolated using Qiagen RNeasy Plus Mini Kit per the manufacturer's instructions and the yield was determined on a NanoDrop ND-1000 spectrophotometer (Thermo Scientific, Wilmington, DE). Samples that had an appropriate yield

(typically >100ng total RNA) were subsequently analyzed for RNA integrity using an Agilent 2100 Bioanalyzer (Agilent Technologies, Inc., Santa Clara, CA). RNA that was determined to be of high quality was converted to cDNA and labeled for subsequent microarray analysis using the MouseRef-8v2.0 Expression BeadChip Kit (Illumina, Inc., San Diego, CA). Sample hybridization scanning and data acquisition was performed by the Genomics Shared Resource at the Fred Hutchinson Cancer Research Center.

For microRNA array: Replicate samples were isolated from spleens and sorted as described above; naïve (n=3; CD8/CD44<sup>lo</sup>), tolerant (n=3; CD8/CD44<sup>hi</sup>), central memory (n=3; CD8/CD90.1/CD44<sup>hi</sup>/CD62L<sup>hi</sup>, >60 days post infection), rescued (n=3; CD8/CD90.2, 22 days post transfer into lymphopenic Alb:GAG Thy.1.1 hosts) TCR<sub>GAG</sub> CD8<sup>+</sup> T cells. After sort, cells were washed twice with cold PBS and cell pellets were stored at -80°C until all samples were collected. Total RNA of re-tolerized T cell samples was generated at later time points for subsequent qPCR of miR-181a.

### **Microarray data analysis**

The complete dataset consisting of all arrays was processed using the Bioconductor package *lumi* by employing quantile normalization (32). The dataset was initially filtered by flagging probes that were below a defined signal “noise floor,” which was calculated as the 75<sup>th</sup> percentile of the negative control probe signals within each array. For each pair-wise comparison (using naïve as the reference), a probe was retained if at least half of the samples in at least one condition were not flagged by the intensity filter. We further filtered each pair-wise comparison through the application of a variance filter, using the “shorth” function of the Bioconductor package *genefilter*. Differential gene expression was determined using the Bioconductor package *limma* (33), and a false discovery rate (FDR) method was used to correct for multiple testing

(34). Significant differential gene expression was defined as  $|\log_2(\text{ratio})| \geq 1$  ( $\pm 2$ -fold) and FDR  $\leq 0.05$ . K-means cluster analysis was performed for those genes found to be differentially expressed in one or more comparison. The normalized  $\log_2$  signal intensities were mean-centered at the probe-level and replicate samples were averaged prior to clustering. The number of clusters was selected using the figure of merit (FOM) method by Yeung et al. (35). K-means clustering and cluster number estimation were performed using the TM4 microarray software suite MultiExperimental Viewer (MeV) (36). Principal component analysis (PCA) plots were generated using Partek® software version 6.4 (Partek Inc., St. Louis, MO), and probability calculations were determined using the hypergeometric distribution. Gene names were associated with GO biological process domain terms using BioMart within Ensembl (release 62). Gene set enrichment analysis (GSEA; <http://www.broadinstitute.org/gsea>) was used to determine whether predefined gene sets show enrichment in particular T cell samples (37, 38).

The microarray data have been deposited in the Gene Expression Omnibus with accession code GSE32025.

### **MicroRNA array profiling and analysis**

MicroRNA array profiling and analysis were performed by “Exiqon Services”, Vedbaek, Denmark. The quality of the total RNA was verified by an Agilent 2100 Bioanalyzer profile. 200 ng total RNA from sample and reference (common reference pool was generated using small amounts of all 9 individual naïve, tolerant and memory T cell samples) was labeled with Hy3™ and Hy5™ fluorescent label, respectively, using the miRCURY™ LNA Array power labeling kit (Exiqon, Denmark) following the procedure described by the manufacturer. The Hy3™-labeled samples and a Hy5™-labeled reference RNA sample were mixed pair-wise and hybridized to the miRCURY™ LNA array version 11.0 mmu (Exiqon, Denmark). The hybridization was

performed according to the miRCURY™ LNA array manual using a Tecan HS4800 hybridization station (Tecan, Austria). After hybridization the microarray slides were scanned and stored in an ozone free environment (ozone level below 2.0 ppb) in order to prevent potential bleaching of the fluorescent dyes. The miRCURY™ LNA array microarray slides were scanned using the Agilent G2565BA Microarray Scanner System (Agilent Technologies, Inc., USA) and the image analysis was carried out using the ImaGene 8.0 software (BioDiscovery, Inc., USA). The quantified signals were background corrected (Normexp with offset value 10 – *Ritchie et al., 2007*) and normalized using the global Lowess (LOcally WEighted Scatterplot Smoothing) regression algorithm. Due to space limitations in Figure 4F the full names for mmu-miR-466 and mmu-miR-297 are mmu-miR-466a-3p/mmu-miR-466b-3p/mmu-miR-466c-3p/m and mmu-miR-297a\*/mmu-miR-297b-3p/mmu-miR-297c\* respectively.

microRNA real-time qPCR: All microRNA real-time qPCR experiments were performed by “Exiqon Services”, Vedbaek, Denmark. 10ng total RNA was reverse transcribed in 10 µl reactions using the miRCURY LNA™ Universal RT microRNA PCR, Polyadenylation and cDNA synthesis kit (Exiqon); each sample was processed in triplicates. cDNA was diluted 100 x and 4 µl was used in 10 µl PCR reactions according to the protocol for miRCURY LNA™ Universal RT microRNA PCR; each microRNA was assayed once by qPCR in triplicate cDNA. The amplification was performed in a LightCycler® 480 Real-Time PCR System (Roche) in 384 well plates. Expression of miR-181a was normalized to miR-34a and miR-let7a. LNATM PCR primer sets for miR-181a: Exiqon Cat.no. 204566.

Data pre-processing: The LightCycler® 480 software was used to determine the Cp value, and to generate amplification- and melting curves. LinRegPCR (ver 11.5) software was used to determine the amplification efficiency. The average amplification efficiency was used to correct

the Raw Cp values. Reference miRNAs were analyzed for stability using SLqPCR algorithm (similar to geNorm) and a selection of the most stable reference miRNAs were used to normalize all measurements on a well-to-well basis.

### **Statistical analyses**

Statistical analyses were performed with Prism version 5.0, GraphPad Software, using unpaired two-tailed Student's *t* tests. A *P* value of <0.05 was considered statistically significant.

# Supplementary Figure 1

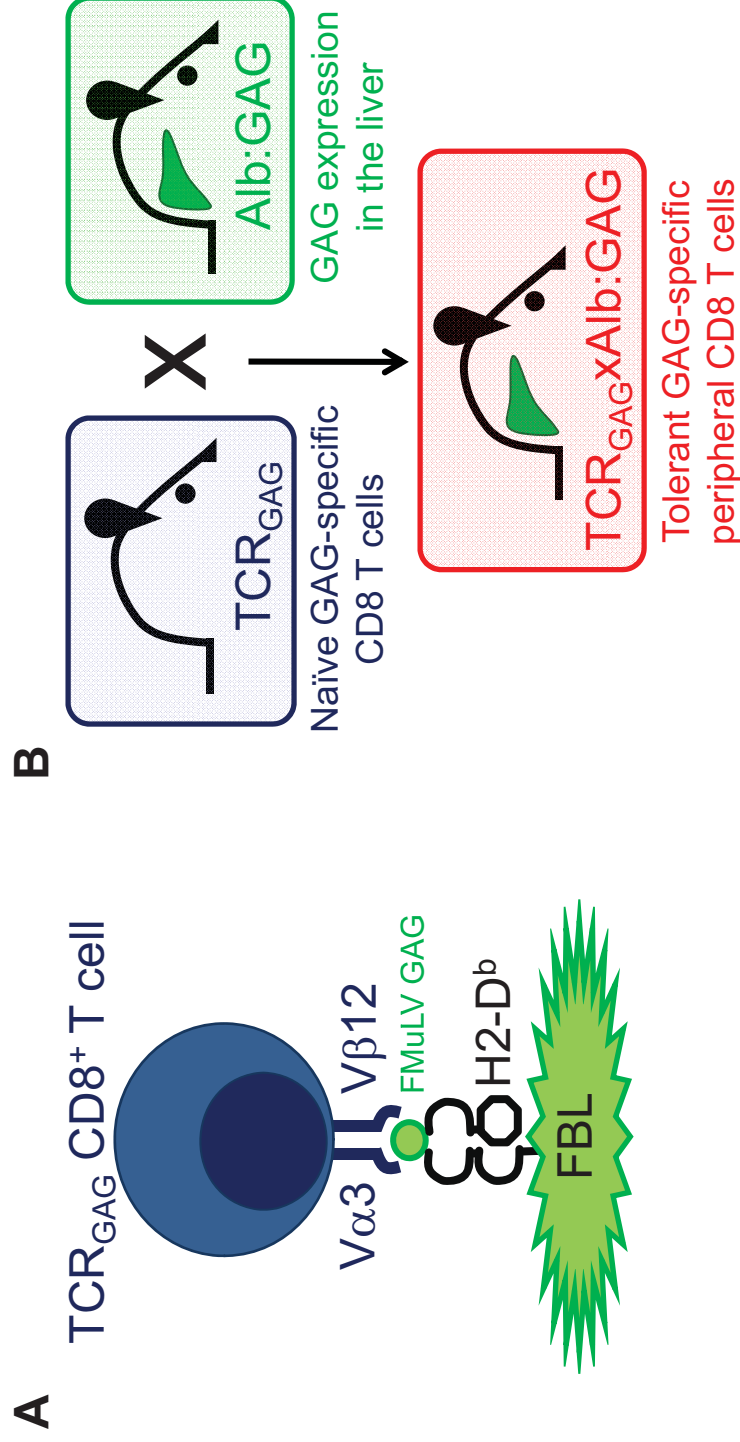

**Supplementary Figure 1: Double-transgenic mouse model of peripheral CD8 T cell tolerance. (A)** Transgenic mice (TCR<sub>GAG</sub>) were engineered to have CD8 T cells expressing a D<sup>b</sup>-restricted Vα3/Vβ12 receptor specific for the Friend murine leukemia virus (FMuLV) GAG epitope, an immunodominant antigen from the FMuLV-transformed mouse leukemia cell line, FBL. **(B)** TCR<sub>GAG</sub> transgenic mice were crossed to a second transgenic mouse strain, Alb:GAG, which selectively expresses the gag transgene in hepatocytes under control of the albumin promoter. Double-transgenic TCR<sub>GAG</sub>xAlb:GAG mice have tolerant GAG-specific CD8 T cells in the periphery. The mouse strains were backcrossed onto the Rag2<sup>-/-</sup> background.



## Supplementary Figure 2

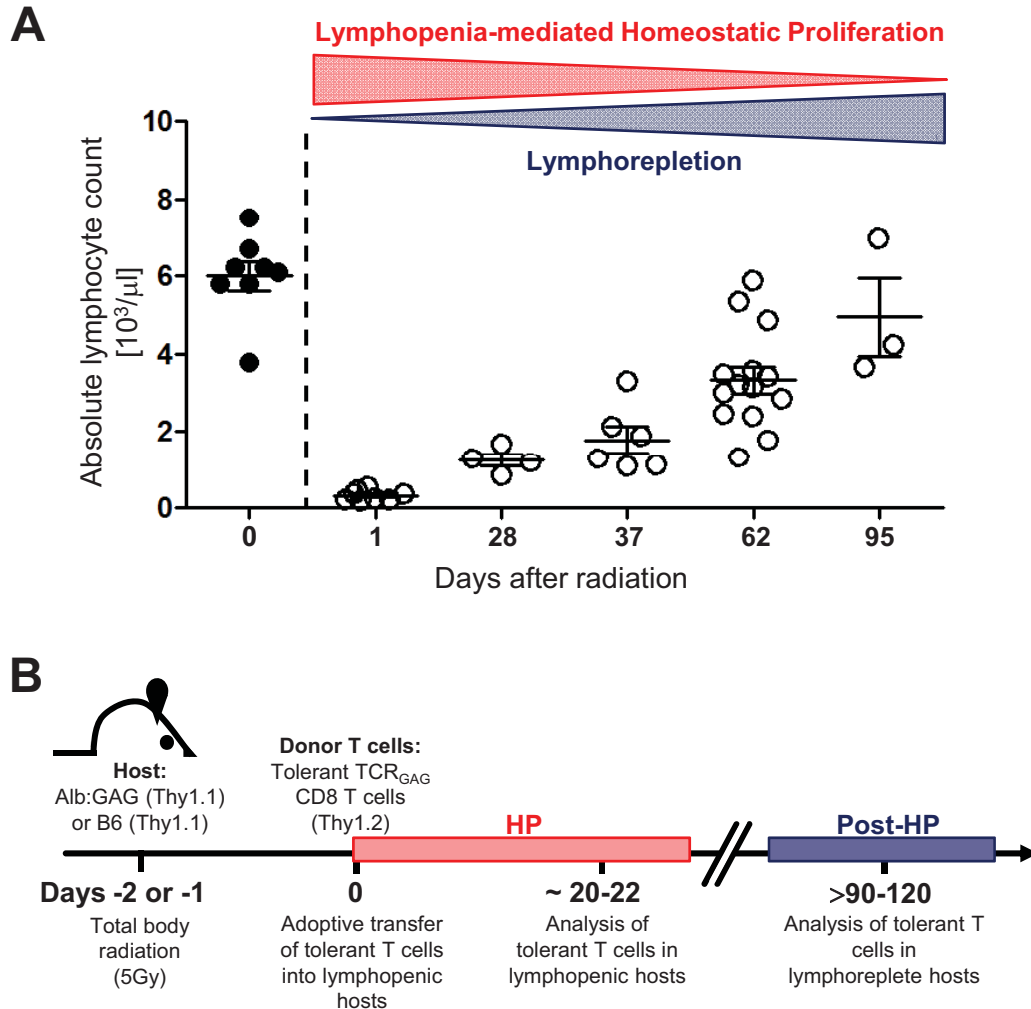

**Supplementary Figure 2: Radiation-induced lymphopenia and lymphorepletion.** (A) Lymphocyte reconstitution in mice following lymphopenia induced by sublethal total body irradiation (5Gy TBI). Adoptively transferred T cells undergo homeostatic proliferation (HP) in lymphopenic hosts. Once normal cellularity of the lymphoid compartment is restored (lymphorepletion) transferred T cells cease their proliferative drive (post-HP). (B) Experimental scheme. Tolerant TCR<sub>GAG</sub> CD8 T cells (Thy1.2) are transferred into lymphopenic Alb:GAG (Thy1.1) or B6 WT (Thy1.1) mice. Analysis of homeostatically proliferating T cells is performed 20-22 days post transfer (HP, red). 3-4 months post radiation, mice are lymphoreplete and analysis of transferred T cells is carried out (post-HP, blue).

## Supplementary Figure 3

**A**

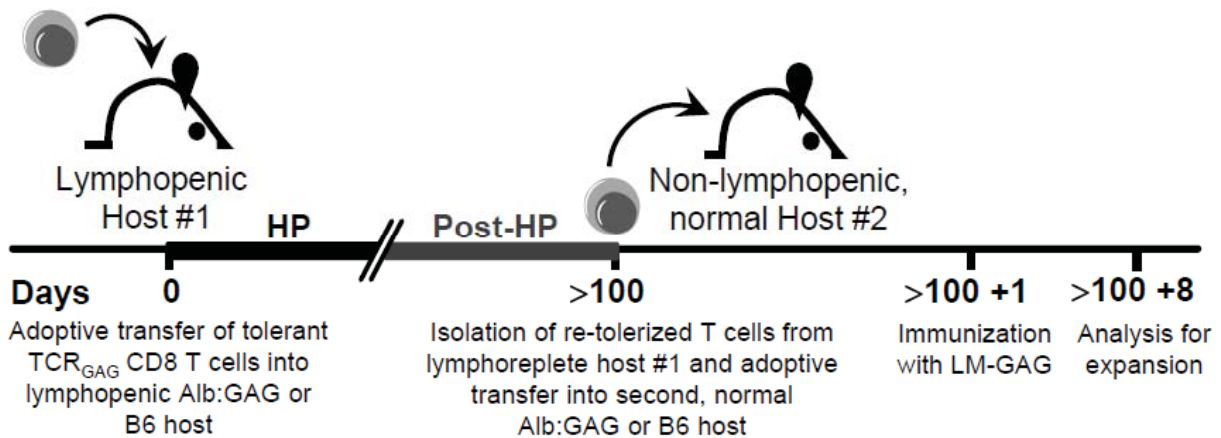

**B**

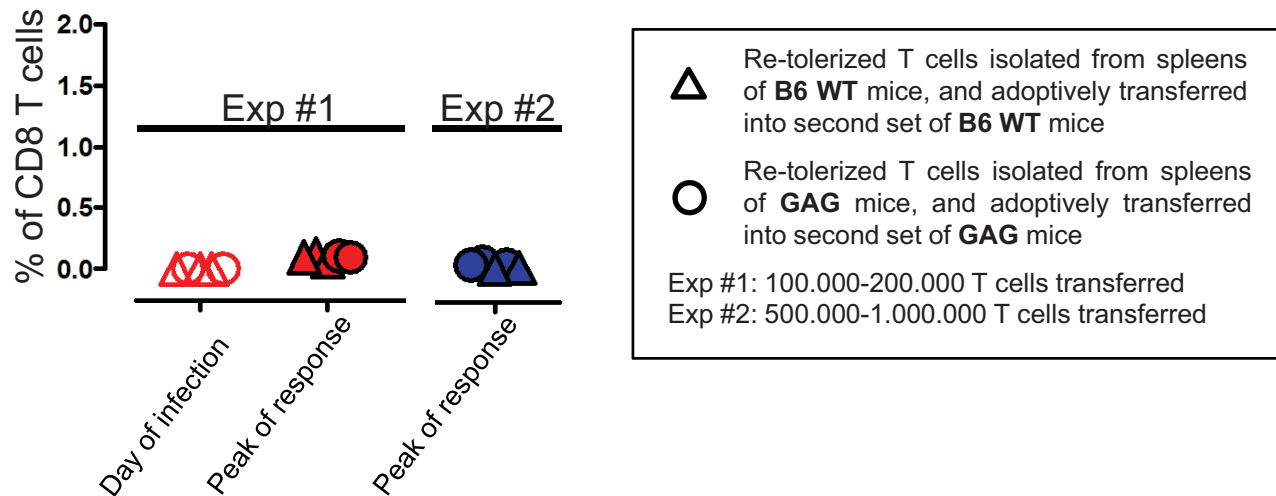

**Supplementary Figure 3: Re-tolerized TCR<sub>GAG</sub> CD8 T cells fail to respond to immunization even in non-tolerogenic hosts.** (A) Experimental scheme. Re-tolerized TCR<sub>GAG</sub> CD8 T cells were isolated and sorted (CD8<sup>+</sup> Thy1.2<sup>+</sup>) from spleens of lymphorepleted Alb:GAG Thy1.1 or B6 Thy1.1 mice and transferred into a second set of normal Alb:GAG Thy1.1 or B6 Thy1.1 mice. One day after secondary transfer mice were immunized with 3x10<sup>7</sup> cfu of LM-GAG and 7 days later spleens assessed for expansion of donor T cells (B). The responsiveness of T cells during HP does not reflect activity of a minor, non-tolerogenic subpopulation since naïve T cells that have undergone HP should have retained their responsive phenotype in the absence of self-antigen (39); furthermore TCR expression levels, in this model, did not correlate with T cell responsiveness since rescued T cells in lymphopenic Alb:GAG mice expressed lower TCR compared to tolerant T cells, and re-tolerized T cells isolated from lymphoreplete B6 hosts expressed significantly higher levels of TCR.

## Supplementary Figure 4

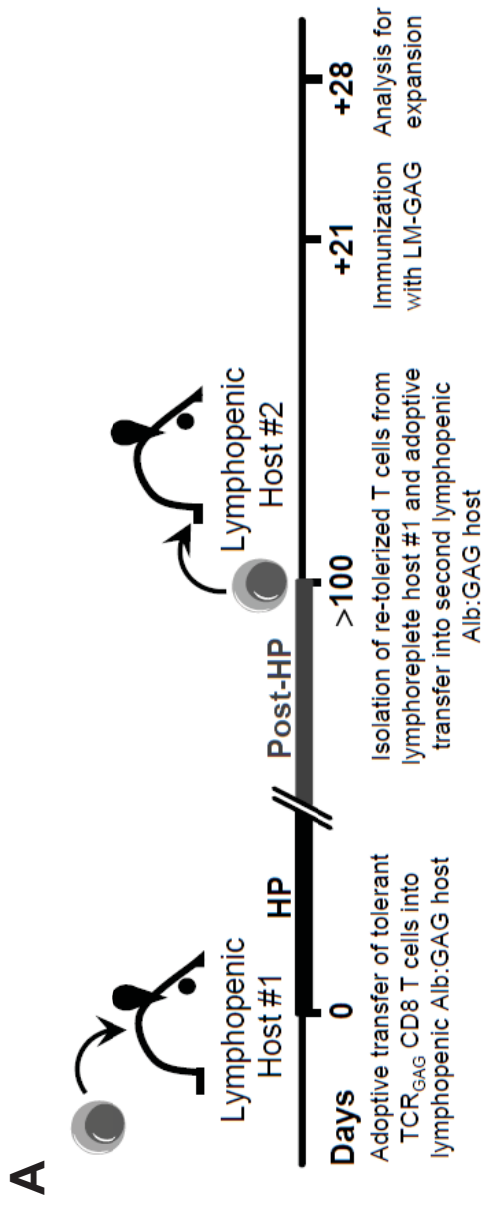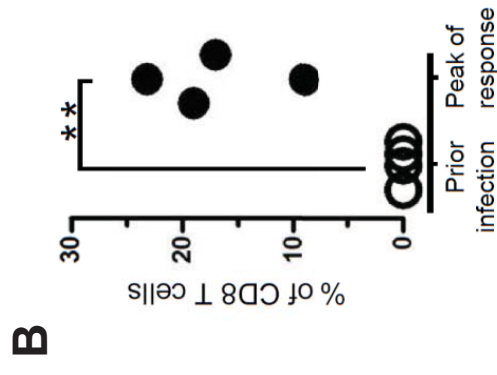

**Supplementary Figure 4: Replicative senescence (Hayflick limit) is not the cause of unresponsiveness during the post-HP phase. (A)** Experimental Scheme. Re-tolerized T cells were isolated and sorted ( $CD8^+ Thy1.2^+$ ) from spleens of lymphorepleted Alb:GAG Thy1.1 mice and transferred into a second set of lymphopenic Alb:GAG Thy1.1 mice one day after TBI. 22 days after secondary transfer mice were immunized with  $3 \times 10^7$  cfu of LM-GAG and 7 days later peripheral blood analyzed by FACS (**B**); \*\*  $P = 0.0012$ .

## Supplementary Figure 5

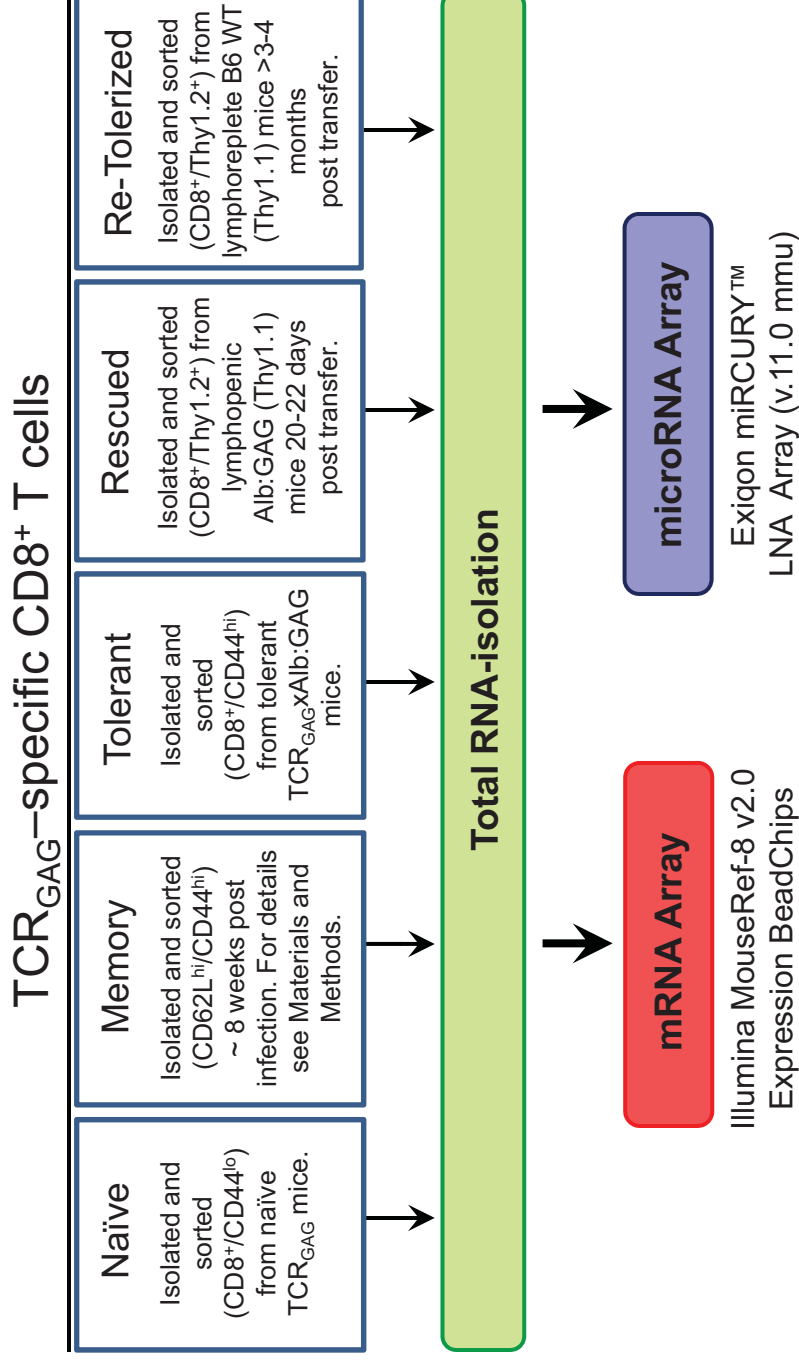

**Supplementary Figure 5: Scheme for genome-wide mRNA and microRNA expression profiling of naïve, memory, tolerant, rescued and re-tolerized TCR<sub>GAG</sub> CD8 T cells.** For detailed information on isolation, purification of samples and downstream analyses see *Materials and Methods*. Note: microRNA array has not been performed on re-tolerized T cell samples (see text).

# Supplementary Figure 6

## A Tolerance-specific genes [ $\uparrow$ T/RT]

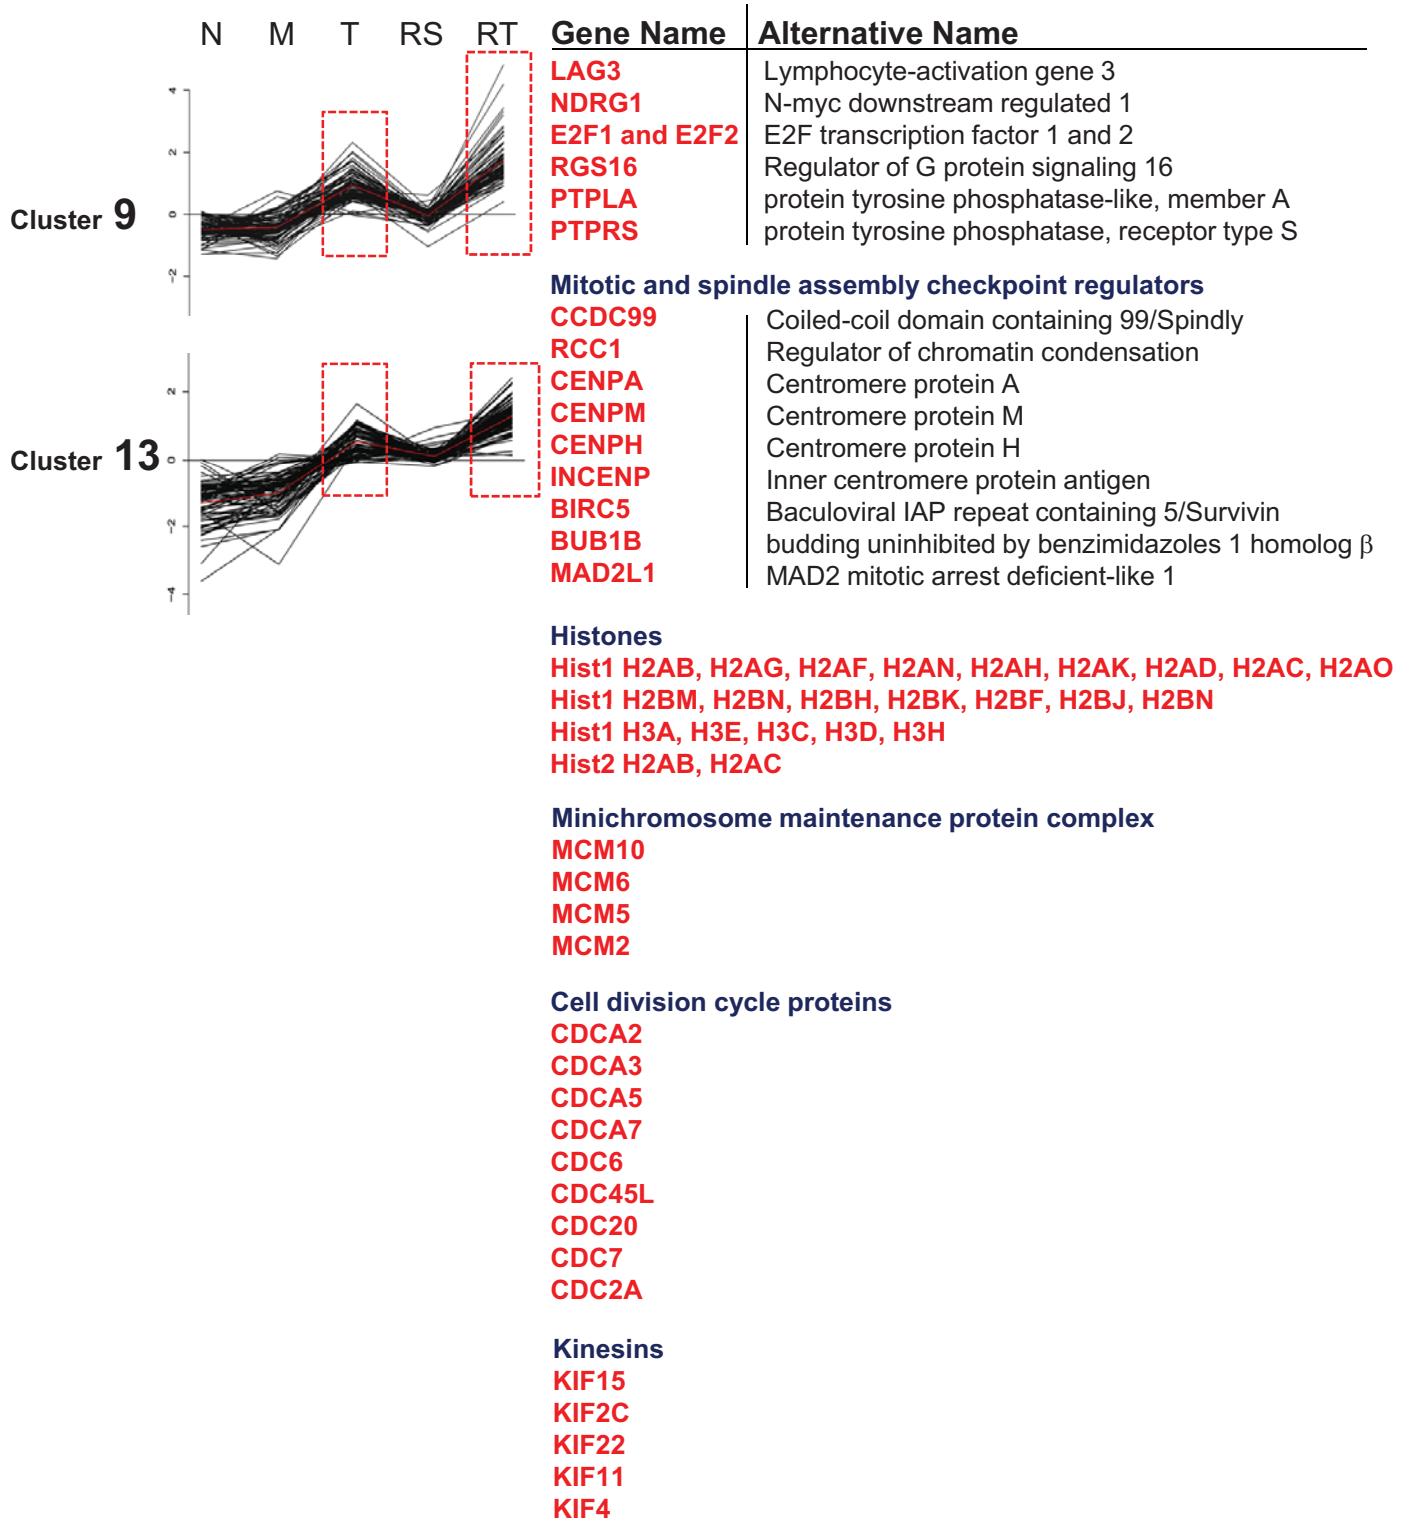

## B

| GO Terms                        | Genes                                                                                                                                                                                                                                                |
|---------------------------------|------------------------------------------------------------------------------------------------------------------------------------------------------------------------------------------------------------------------------------------------------|
| Cell Cycle (32)                 | BIRC5, BUB1B, CDC2A, CDC45L, CDC7, CDCA3, H2AFX, INCENP, KIF11, LIG1, MCM6, UHRF1, PLK1, CDC6, CHAF1A, SPAG5, MAD2L1, SPC25, CDCA5, NCAPD2, ANLN, CCDC99, SGOL1, KIF2C, CDC20, NUSAP1, CDCA2, CHAF1B, KNTC1, FANCD2, CHTF18, CLSPN                   |
| Cell Division (25)              | CDC7, CDCA3, KIF11, LIG1, MCM5, PLK1, AURKA, CDC6, CENPH, SPAG5, MAD2L1, SPC25, CDCA5, BIRC5, BUB1B, NCAPD2, CCDC99, SGOL1, KIF2C, CDC20, NUSAP1, CDCA2, KNTC1, NCAPH, CCNB1                                                                         |
| Nucleosome Assembly (24)        | HIST1H3C, HIST1H3D, HIST1H3E, HIST1H3H, HIST1H2AD, HIST1H2AG, HIST1H2AH, HIST1H2AK, HIST1H2AN, HIST1H2AO, HIST1H2AB, HIST1H2AF, HIST2H2AC, HIST1H2BF, HIST1H2BH, HIST1H2BJ, HIST1H2BK, HIST1H2BM, HIST1H2BN, HIST1H3A, HIST2H2AB, H2AFX, CENPA, MCM2 |
| Mitosis (19)                    | BIRC5, CDCA3, INCENP, PLK1, AURKA, CDC6, SPAG5, MAD2L1, SPC25, CDCA5, NCAPD2, ANLN, CCDC99, SGOL1, KIF2C, CDC20, CDCA2, KNTC1, NCAPH                                                                                                                 |
| DNA replication (13)            | CDC45L, LIG1, MCM2, MCM5, MCM6, RRM1, RRM2, TK1, CDC6, CHAF1A, MCM10, CHAF1B, CHTF18                                                                                                                                                                 |
| DNA repair (12)                 | FEN1, H2AFX, LIG1, UHRF1, RAD51, CHAF1A, APITD1, KIF22, CHAF1B, FANCD2, CLSPN, E130016E03RIK                                                                                                                                                         |
| Regulation of transcription (8) | E2F1, MCM6, UHRF1, SOX5, CHAF1A, LITAF, CDCA7, CHAF1B                                                                                                                                                                                                |

### C Rescue-associated genes [ $\downarrow$ M/RS and $\uparrow$ T/RT or $\uparrow$ M/RS and $\downarrow$ T/RT]

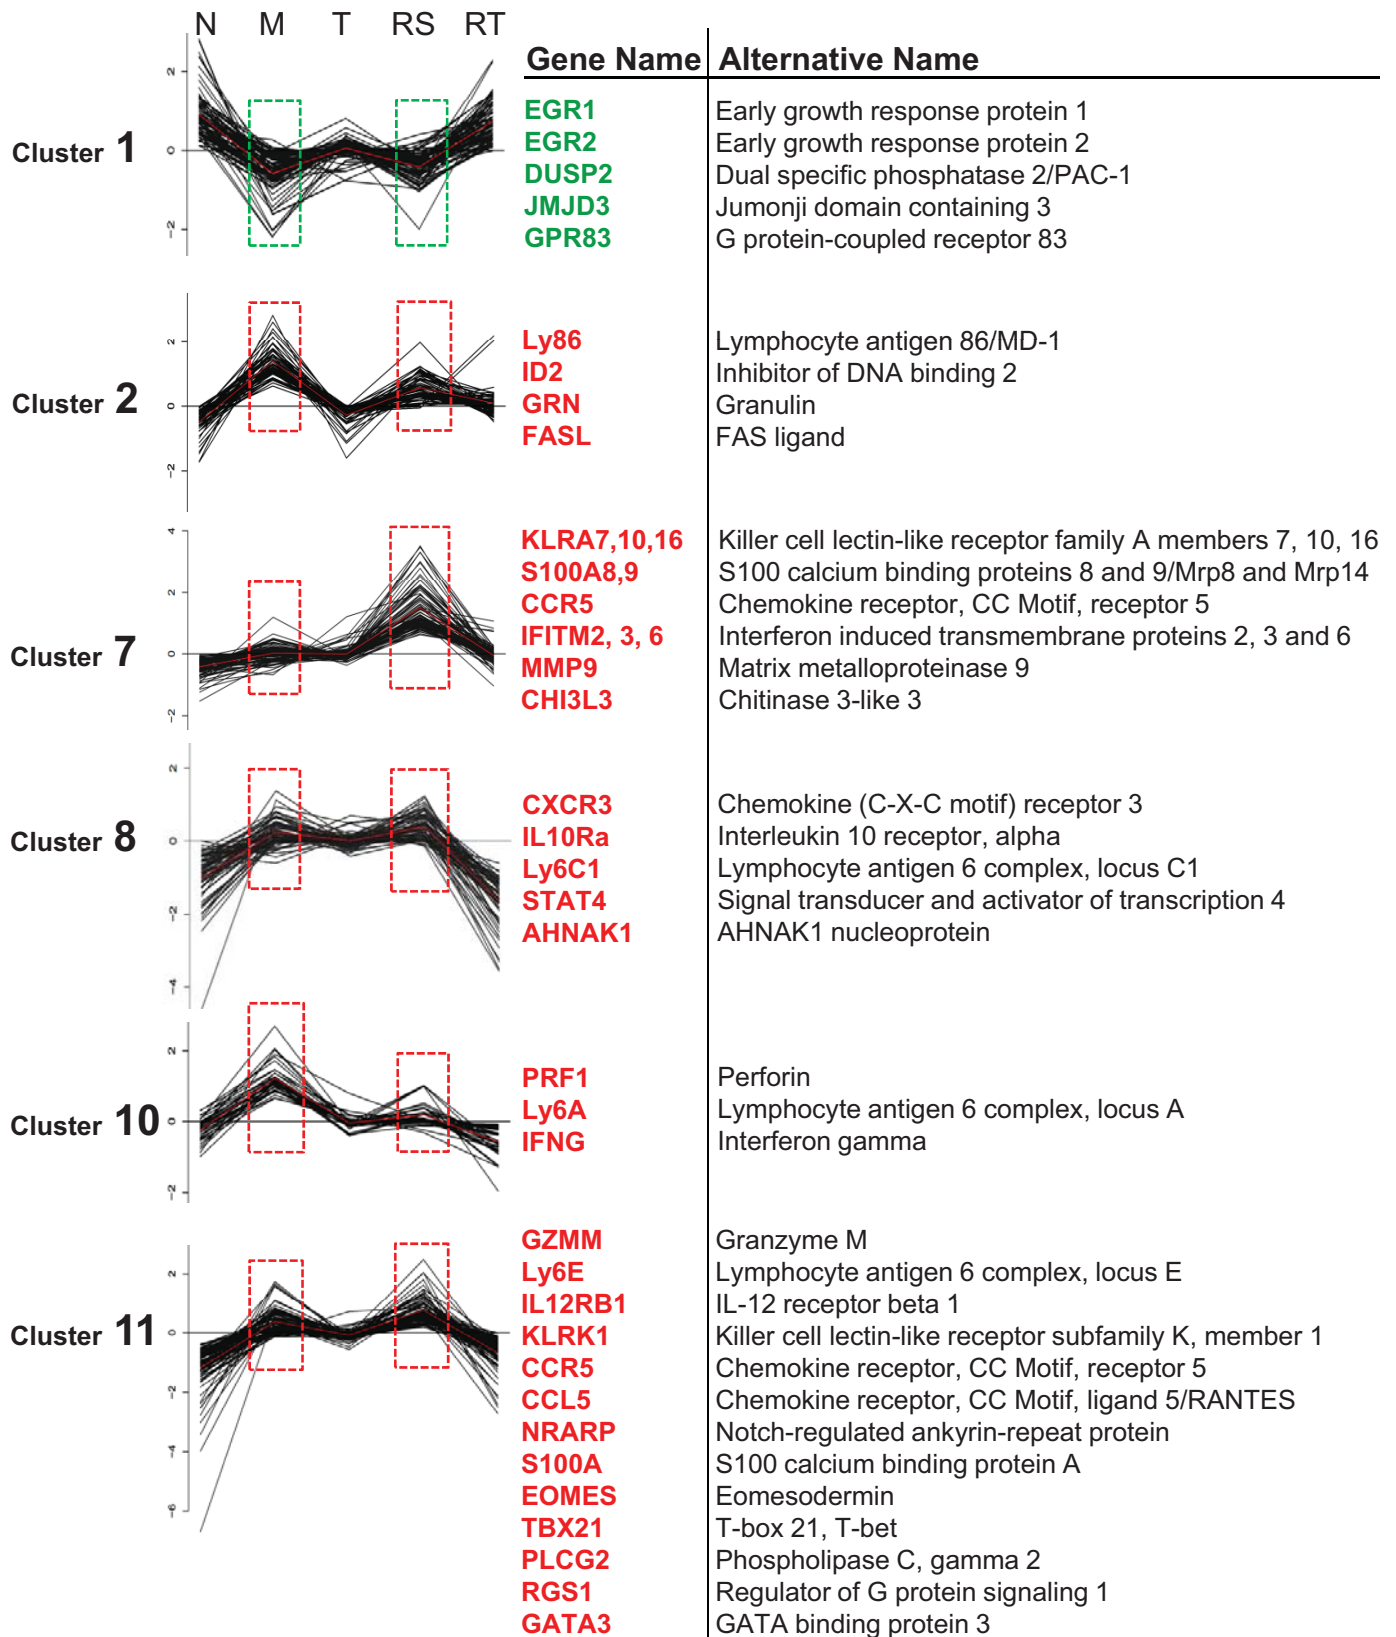

**Supplementary Figure 6: K-means clustering of gene expression profiles for naïve, memory, tolerant, rescued and re-tolerized T cells.** K-means clusters show  $\log_2$ -transformed expression intensities mean-centered at the probe-level. **(A)** Tolerance-specific genes uniquely up-regulated in tolerant and re-tolerized T cells are represented in clusters 9 and 13. **(B)** Gene ontology (GO) analysis of tolerance-specific genes from clusters 9 and 13. Shown are the top 6 GO terms with the identified genes. **(C)** Rescue-associated gene sets, clusters 1, 2, 7, 8, 10 and 11. Clusters represent genes up- or down-regulated in memory and rescued T cells (red or green boxes) but not in tolerant or re-tolerized T cells. Gene names and alternative names are shown.



# Supplementary Figure 7

A

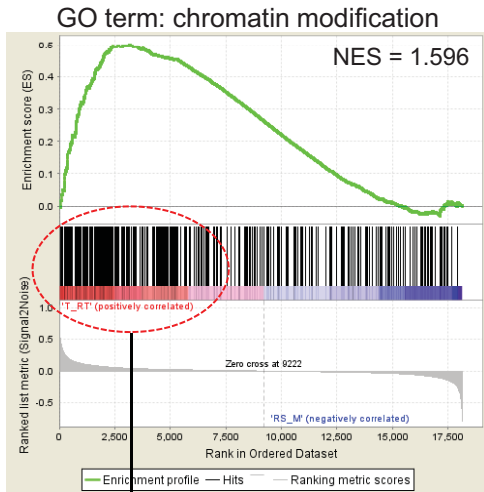

B

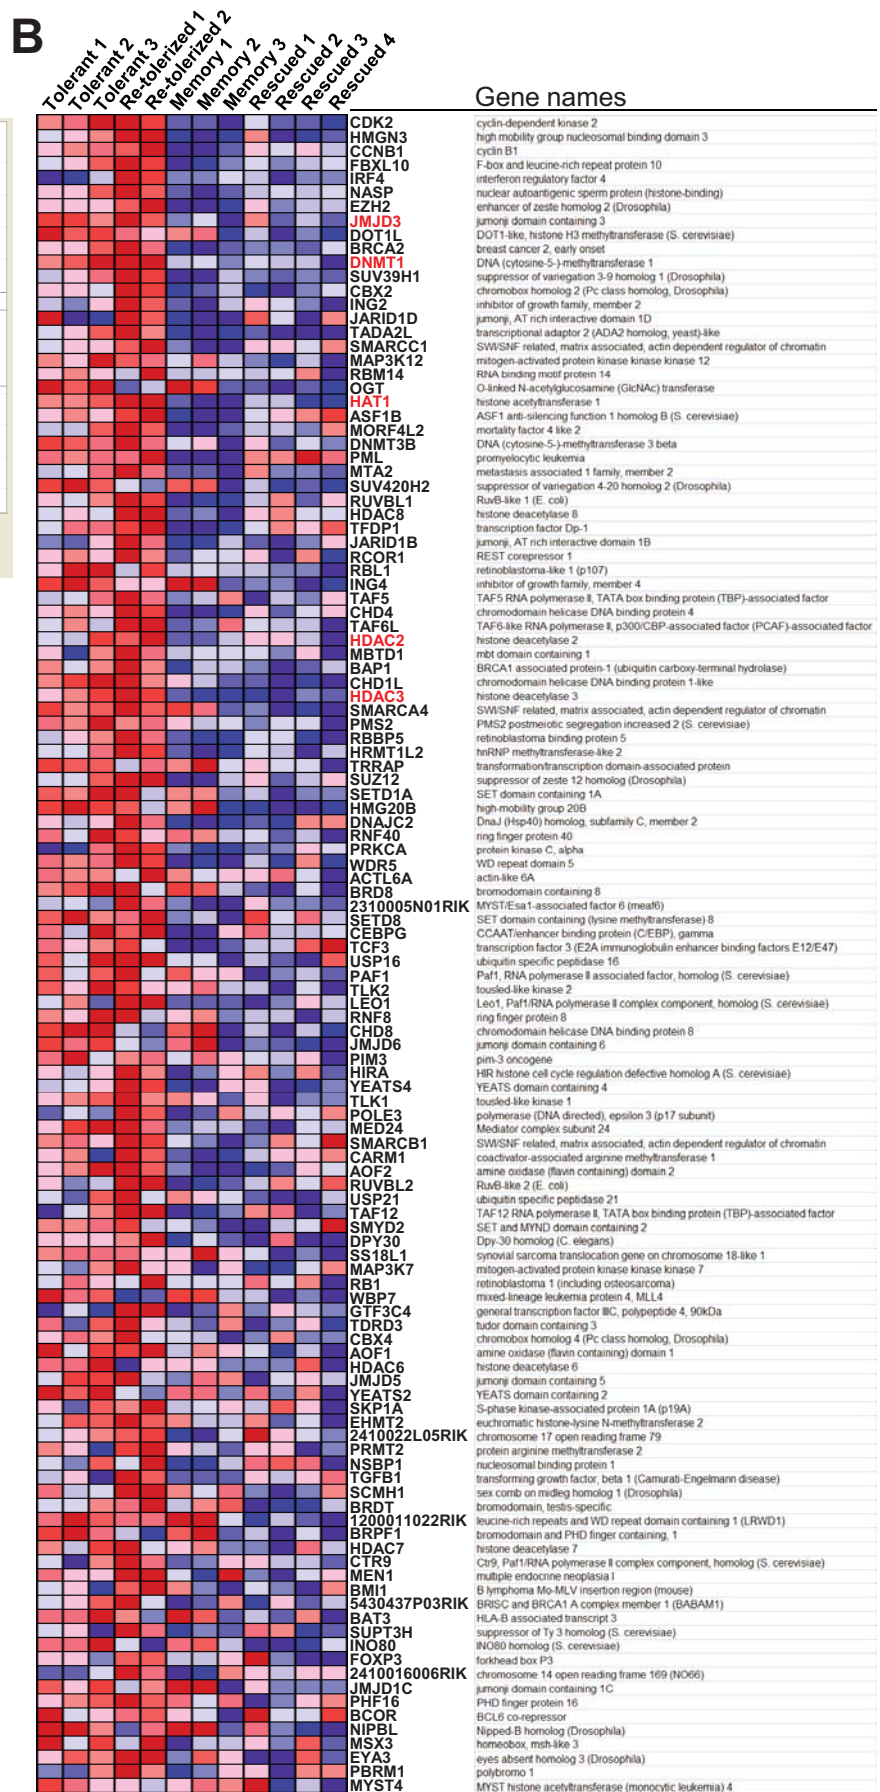

C

|    | GENE SYMBOL   | GENE TITLE                                                                                        | RANK IN GENE LIST | RANK METRIC SCORE | RUNNING ES  | CORE ENRICHMENT |
|----|---------------|---------------------------------------------------------------------------------------------------|-------------------|-------------------|-------------|-----------------|
| 1  | CDK2          | cyclin-dependent kinase 2                                                                         | 83                | 0.427261323       | 0.016899513 | Yes             |
| 2  | HMGN3         | high mobility group nucleosomal binding domain 3                                                  | 101               | 0.398789883       | 0.036068507 | Yes             |
| 3  | CCNB1         | cyclin B1                                                                                         | 140               | 0.340105832       | 0.05109696  | Yes             |
| 4  | FBXL10        | F-box and leucine-rich repeat protein 10                                                          | 218               | 0.278510064       | 0.060827155 | Yes             |
| 5  | IRF4          | interferon regulatory factor 4                                                                    | 245               | 0.264148027       | 0.0726965   | Yes             |
| 6  | NASP          | nuclear autoantigenic sperm protein (histone-binding)                                             | 250               | 0.260947973       | 0.08563977  | Yes             |
| 7  | EZH2          | enhancer of zeste homolog 2 (Drosophila)                                                          | 254               | 0.257332504       | 0.09845674  | Yes             |
| 8  | JMJ3          | jumonji domain containing 3                                                                       | 266               | 0.253666788       | 0.110639505 | Yes             |
| 9  | DOT1L         | DOT1-like, histone H3 methyltransferase (S. cerevisiae)                                           | 337               | 0.2233769         | 0.11798067  | Yes             |
| 10 | BRCA2         | breast cancer 2, early onset                                                                      | 353               | 0.219625369       | 0.12822102  | Yes             |
| 11 | DNMT1         | DNA (cytosine-5-)-methyltransferase 1                                                             | 376               | 0.213249385       | 0.13774656  | Yes             |
| 12 | SUV39H1       | suppressor of variegation 3-9 homolog 1 (Drosophila)                                              | 380               | 0.21253714        | 0.14830308  | Yes             |
| 13 | Cbx2          | chromobox homolog 2 (Pc class homolog, Drosophila)                                                | 382               | 0.211818233       | 0.15893564  | Yes             |
| 14 | ING2          | inhibitor of growth family, member 2                                                              | 389               | 0.20988822        | 0.16919003  | Yes             |
| 15 | JARID1D       | jumonji, AT rich interactive domain 1D                                                            | 455               | 0.192932457       | 0.17527568  | Yes             |
| 16 | TADA2L        | transcriptional adaptor 2 (ADA2 homolog, yeast)-like                                              | 489               | 0.184326738       | 0.18272403  | Yes             |
| 17 | SMARCC1       | SWI/SNF related, matrix associated, actin dependent regulator of chromatin, subfamily c, member 1 | 505               | 0.181631267       | 0.19104713  | Yes             |
| 18 | MAP3K12       | mitogen-activated protein kinase kinase kinase 12                                                 | 533               | 0.176455855       | 0.19843523  | Yes             |
| 19 | RBM14         | RNA binding motif protein 14                                                                      | 573               | 0.165710911       | 0.20460726  | Yes             |
| 20 | OGT           | O-linked N-acetylglucosamine (GlcNAc) transferase                                                 | 588               | 0.163274154       | 0.21206018  | Yes             |
| 21 | HAT1          | histone acetyltransferase 1                                                                       | 592               | 0.16258575        | 0.22009608  | Yes             |
| 22 | ASF1B         | ASF1 anti-silencing function 1 homolog B (S. cerevisiae)                                          | 702               | 0.148330852       | 0.22146027  | Yes             |
| 23 | MORF4L2       | mortality factor 4 like 2                                                                         | 721               | 0.146211356       | 0.22782756  | Yes             |
| 24 | DNMT3B        | DNA (cytosine-5-)-methyltransferase 3 beta                                                        | 745               | 0.142823175       | 0.2374312   | Yes             |
| 25 | PML           | promyelocytic leukemia                                                                            | 746               | 0.142678365       | 0.24094291  | Yes             |
| 26 | MTA2          | metastasis associated 1 family, member 2                                                          | 754               | 0.141108081       | 0.24767038  | Yes             |
| 27 | SUV420H2      | suppressor of variegation 4-20 homolog 2 (Drosophila)                                             | 761               | 0.140796766       | 0.2544383   | Yes             |
| 28 | RUVBL1        | RuvB-like 1 (E. coli)                                                                             | 771               | 0.139453724       | 0.26096997  | Yes             |
| 29 | HDAC8         | histone deacetylase 8                                                                             | 783               | 0.137962488       | 0.26731512  | Yes             |
| 30 | TFDP1         | transcription factor Dp-1                                                                         | 806               | 0.13607043        | 0.27294606  | Yes             |
| 31 | JARID1B       | jumonji, AT rich interactive domain 1B                                                            | 813               | 0.13525711        | 0.27943444  | Yes             |
| 32 | RCOR1         | REST corepressor 1                                                                                | 852               | 0.131043524       | 0.28391325  | Yes             |
| 33 | RBL1          | retinoblastoma-like 1 (p107)                                                                      | 869               | 0.129746228       | 0.289562    | Yes             |
| 34 | ING4          | inhibitor of growth family, member 4                                                              | 871               | 0.129595622       | 0.29604545  | Yes             |
| 35 | TAF5          | TAF5 RNA polymerase II, TATA box binding protein (TBP)-associated factor, 100kDa                  | 896               | 0.127395883       | 0.30112636  | Yes             |
| 36 | CHD4          | chromodomain helicase DNA binding protein 4                                                       | 929               | 0.124236919       | 0.30559862  | Yes             |
| 37 | TAF6L         | TAF6-like RNA polymerase II, p300/CBP-associated factor (PCAF)-associated factor, 65kDa           | 934               | 0.123564117       | 0.31160927  | Yes             |
| 38 | HDAC2         | histone deacetylase 2                                                                             | 984               | 0.1193204         | 0.3148788   | Yes             |
| 39 | MBTD1         | mbt domain containing 1                                                                           | 986               | 0.11920435        | 0.32083791  | Yes             |
| 40 | BAP1          | BRCA1 associated protein-1 (ubiquitin carboxy-terminal hydrolase)                                 | 1071              | 0.113522656       | 0.32184947  | Yes             |
| 41 | CHD1L         | chromodomain helicase DNA binding protein 1-like                                                  | 1097              | 0.11218743        | 0.3261068   | Yes             |
| 42 | HDAC3         | histone deacetylase 3                                                                             | 1104              | 0.111529015       | 0.3313978   | Yes             |
| 43 | SMARCA4       | SWI/SNF related, matrix associated, actin dependent regulator of chromatin, subfamily a, member 4 | 1121              | 0.110351607       | 0.33606786  | Yes             |
| 44 | PMS2          | PMS2 postmeiotic segregation increased 2 (S. cerevisiae)                                          | 1137              | 0.108649857       | 0.3407082   | Yes             |
| 45 | RBBP5         | retinoblastoma binding protein 5                                                                  | 1171              | 0.10589365        | 0.34419817  | Yes             |
| 46 | HRMT1L2       | hnRNP methyltransferase-like 2                                                                    | 1173              | 0.105708972       | 0.34947628  | Yes             |
| 47 | TRRAP         | transformation/transcription domain-associated protein                                            | 1191              | 0.10456533        | 0.35379818  | Yes             |
| 48 | SUZ12         | suppressor of zeste 12 homolog (Drosophila)                                                       | 1199              | 0.104012631       | 0.35865375  | Yes             |
| 49 | SETD1A        | SET domain containing 1A                                                                          | 1219              | 0.103118166       | 0.36279035  | Yes             |
| 50 | HMG20B        | high-mobility group 20B                                                                           | 1238              | 0.102017626       | 0.36692756  | Yes             |
| 51 | DNAJC2        | DnaJ (Hsp40) homolog, subfamily C, member 2                                                       | 1282              | 0.099648811       | 0.36954135  | Yes             |
| 52 | RNF40         | ring finger protein 40                                                                            | 1352              | 0.096495837       | 0.37053603  | Yes             |
| 53 | PRKCA         | protein kinase C, alpha                                                                           | 1387              | 0.095143177       | 0.37342787  | Yes             |
| 54 | WDR5          | WD repeat domain 5                                                                                | 1402              | 0.094431467       | 0.3774069   | Yes             |
| 55 | ACTL8A        | actin-like 6A                                                                                     | 1434              | 0.093199909       | 0.38036913  | Yes             |
| 56 | BRD8          | bromodomain containing 8                                                                          | 1441              | 0.092853881       | 0.38471776  | Yes             |
| 57 | 2310005N01RIK | MYST/Esa1-associated factor 6 (meaf6)                                                             | 1475              | 0.090887889       | 0.38745102  | Yes             |
| 58 | SETD8         | SET domain containing (lysine methyltransferase) 8                                                | 1488              | 0.090272427       | 0.39133248  | Yes             |
| 59 | CEBPB         | CCAAT/enhancer binding protein (C/EBP), gamma                                                     | 1499              | 0.089827366       | 0.39530376  | Yes             |
| 60 | TCF3          | transcription factor 3 (E2A immunoglobulin enhancer binding factors E12/E47)                      | 1566              | 0.086825378       | 0.39597893  | Yes             |
| 61 | USP16         | ubiquitin specific peptidase 16                                                                   | 1571              | 0.086455278       | 0.40011698  | Yes             |
| 62 | PAF1          | Paf1, RNA polymerase II associated factor, homolog (S. cerevisiae)                                | 1588              | 0.085441738       | 0.40353006  | Yes             |
| 63 | TLK2          | tousled-like kinase 2                                                                             | 1595              | 0.085189477       | 0.40749192  | Yes             |
| 64 | LEO1          | Leo1, Paf1/RNA polymerase II complex component, homolog (S. cerevisiae)                           | 1605              | 0.084975943       | 0.41127458  | Yes             |
| 65 | RNF8          | ring finger protein 8                                                                             | 1620              | 0.08446487        | 0.41475064  | Yes             |
| 66 | CHD8          | chromodomain helicase DNA binding protein 8                                                       | 1621              | 0.084430397       | 0.41901115  | Yes             |
| 67 | JMJ6          | jumonji domain containing 6                                                                       | 1646              | 0.083185405       | 0.4218611   | Yes             |
| 68 | PIM3          | pim-3 oncogene                                                                                    | 1659              | 0.082581855       | 0.42535448  | Yes             |
| 69 | HIRA          | HIR histone cell cycle regulation defective homolog A (S. cerevisiae)                             | 1703              | 0.080668554       | 0.42701015  | Yes             |
| 70 | YEATS4        | YEATS domain containing 4                                                                         | 1752              | 0.078448951       | 0.42827377  | Yes             |
| 71 | TLK1          | tousled-like kinase 1                                                                             | 1784              | 0.077551328       | 0.43044636  | Yes             |
| 72 | POLE3         | polymerase (DNA directed), epsilon 3 (p17 subunit)                                                | 1800              | 0.076944992       | 0.43348682  | Yes             |
| 73 | MED24         | Mediator complex subunit 24                                                                       | 1828              | 0.075917579       | 0.43580157  | Yes             |
| 74 | SMARCB1       | SWI/SNF related, matrix associated, actin dependent regulator of chromatin, subfamily b, member 1 | 1840              | 0.075437412       | 0.43899056  | Yes             |
| 75 | CARM1         | coactivator-associated arginine methyltransferase 1                                               | 1841              | 0.075392641       | 0.442795    | Yes             |
| 76 | AOF2          | amine oxidase (flavin containing) domain 2                                                        | 1910              | 0.073199488       | 0.4426703   | Yes             |
| 77 | RUVBL2        | RuvB-like 2 (E. coli)                                                                             | 1911              | 0.073160261       | 0.44636208  | Yes             |
| 78 | USP21         | ubiquitin specific peptidase 21                                                                   | 1939              | 0.072016142       | 0.44847995  | Yes             |
| 79 | TAF12         | TAF12 RNA polymerase II, TATA box binding protein (TBP)-associated factor, 20kDa                  | 1943              | 0.071849264       | 0.4519371   | Yes             |
| 80 | SMYD2         | SET and MYND domain containing 2                                                                  | 1968              | 0.071208976       | 0.45418274  | Yes             |
| 81 | DPY30         | Dpy-30 homolog (C. elegans)                                                                       | 1982              | 0.070794173       | 0.45702514  | Yes             |
| 82 | SS18L1        | synovial sarcoma translocation gene on chromosome 18-like 1                                       | 1983              | 0.070737325       | 0.46059465  | Yes             |
| 83 | MAP3K7        | mitogen-activated protein kinase kinase kinase 7                                                  | 1996              | 0.070139818       | 0.46346018  | Yes             |
| 84 | RB1           | retinoblastoma 1 (including osteosarcoma)                                                         | 2018              | 0.069372296       | 0.46578157  | Yes             |
| 85 | WBP7          | mixed-lineage leukemia protein 4, MLL4                                                            | 2040              | 0.068535268       | 0.46806073  | Yes             |
| 86 | GTF3C4        | general transcription factor IIC, polypeptide 4, 90kDa                                            | 2043              | 0.068492748       | 0.4714047   | Yes             |

|     | GENE SYMBOL   | GENE TITLE                                                              | RANK IN GENE LIST | RANK METRIC SCORE | RUNNING ES | CORE ENRICHMENT |
|-----|---------------|-------------------------------------------------------------------------|-------------------|-------------------|------------|-----------------|
| 87  | TDRD3         | tudor domain containing 3                                               | 2051              | 0.068233572       | 0.4744548  | Yes             |
| 88  | CBX4          | chromobox homolog 4 (Pc class homolog, Drosophila)                      | 2103              | 0.066387154       | 0.47494093 | Yes             |
| 89  | AOF1          | amine oxidase (flavin containing) domain 1                              | 2139              | 0.06513419        | 0.4762623  | Yes             |
| 90  | HDAC6         | histone deacetylase 6                                                   | 2157              | 0.06469962        | 0.47857252 | Yes             |
| 91  | JMJD5         | jumonji domain containing 5                                             | 2197              | 0.063398257       | 0.47958168 | Yes             |
| 92  | YEATS2        | YEATS domain containing 2                                               | 2253              | 0.061880447       | 0.47961578 | Yes             |
| 93  | SKP1A         | S-phase kinase-associated protein 1A (p19A)                             | 2256              | 0.061724737       | 0.4826182  | Yes             |
| 94  | EHMT2         | euchromatic histone-lysine N-methyltransferase 2                        | 2258              | 0.061604612       | 0.48567072 | Yes             |
| 95  | 2410022L05RIK | chromosome 17 open reading frame 79                                     | 2306              | 0.060063578       | 0.48606238 | Yes             |
| 96  | PRMT2         | protein arginine methyltransferase 2                                    | 2311              | 0.060021173       | 0.4888665  | Yes             |
| 97  | NSBP1         | nucleosomal binding protein 1                                           | 2324              | 0.059738655       | 0.49120718 | Yes             |
| 98  | TGFB1         | transforming growth factor, beta 1 (Camurati-Engelmann disease)         | 2327              | 0.059605874       | 0.4941027  | Yes             |
| 99  | SCMH1         | sex comb on midleg homolog 1 (Drosophila)                               | 2379              | 0.058013704       | 0.49416628 | Yes             |
| 100 | BRDT          | bromodomain, testis-specific                                            | 2383              | 0.057949249       | 0.49692205 | Yes             |
| 101 | 1200011O22RIK | leucine-rich repeats and WD repeat domain containing 1 (LRWD1)          | 2403              | 0.057387225       | 0.49875095 | Yes             |
| 102 | BRPF1         | bromodomain and PHD finger containing, 1                                | 2490              | 0.055479322       | 0.49672124 | Yes             |
| 103 | HDAC7         | histone deacetylase 7                                                   | 2552              | 0.054050263       | 0.4960233  | Yes             |
| 104 | CTR9          | Ctr9, Paf1/RNA polymerase II complex component, homolog (S. cerevisiae) | 2564              | 0.053811803       | 0.49812102 | Yes             |
| 105 | MEN1          | multiple endocrine neoplasia 1                                          | 2611              | 0.052698962       | 0.4981972  | Yes             |
| 106 | BM1           | B lymphoma Mo-MLV insertion region (mouse)                              | 2624              | 0.052405816       | 0.50016785 | Yes             |
| 107 | 5430437P03RIK | BRISC and BRCA1 A complex member 1 (BABAM1)                             | 2669              | 0.051359221       | 0.5002887  | Yes             |
| 108 | BAT3          | HLA-B associated transcript 3                                           | 2804              | 0.04865548        | 0.49521923 | Yes             |
| 109 | SUPT3H        | suppressor of Ty 3 homolog (S. cerevisiae)                              | 2834              | 0.048102628       | 0.49601808 | Yes             |
| 110 | INO80         | INO80 homolog (S. cerevisiae)                                           | 2844              | 0.047931623       | 0.49793142 | Yes             |
| 111 | FOXP3         | forkhead box P3                                                         | 2851              | 0.047857907       | 0.5000095  | Yes             |
| 112 | 2410016O06RIK | chromosome 14 open reading frame 169 (NO66)                             | 2905              | 0.046911653       | 0.49940053 | Yes             |
| 113 | JMJD1C        | jumonji domain containing 1C                                            | 2933              | 0.046425451       | 0.50022703 | Yes             |
| 114 | PHF16         | PHD finger protein 16                                                   | 2953              | 0.046166502       | 0.50148976 | Yes             |
| 115 | BCOR          | BCCL6 co-repressor                                                      | 3011              | 0.045348484       | 0.50057733 | Yes             |
| 116 | NIPBL         | Nipped-B homolog (Drosophila)                                           | 3049              | 0.044736922       | 0.5007571  | Yes             |
| 117 | MSX3          | homeobox, msh-like 3                                                    | 3097              | 0.044128768       | 0.50034463 | Yes             |
| 118 | EYA3          | eyes absent homolog 3 (Drosophila)                                      | 3139              | 0.043376565       | 0.50023115 | Yes             |
| 119 | PBRM1         | polybromo 1                                                             | 3145              | 0.043290898       | 0.5021349  | Yes             |
| 120 | MYST4         | MYST histone acetyltransferase (monocytic leukemia) 4                   | 3164              | 0.042988345       | 0.5032934  | Yes             |

**Supplementary Figure 7: Gene set enrichment analysis of genes regulating chromatin modification in memory and rescued T cell samples versus tolerant and re-tolerized T cell samples.** Expression data were analyzed for genes involved in chromatin modification using gene set enrichment analysis (GSEA). Gene set consists of 330 genes found in the gene ontology term ‘chromatin modification’ ([www.geneontology.org](http://www.geneontology.org); GO:0016568 chromatin modification; consisting of 376 genes total; 330 genes found on microarray). **(A)** Gene set enrichment plot showing skewing to the left, indicating enrichment of chromatin modifying genes in tolerant and re-tolerized T cells compared to memory and rescued T cells. The distribution of the genes is listed according to rank position. 120 genes were found to be enriched in data set. NES, normalized enrichment score. **(B)** Corresponding heat map displaying the expression levels of the 120 most enriched genes. Expression levels are represented as a gradient from high (red) to low (blue). Gene names listed in red are examples for DNA-methyltransferases (DNMT1), histone demethylases (JMJD3), histone acetyltransferases (HAT1), and histone deacetylases (HDAC2, HDAC3). All 120 genes including ranked metric score and enrichment score (ES) are listed in **(C)**.

# Supplementary Figure 8

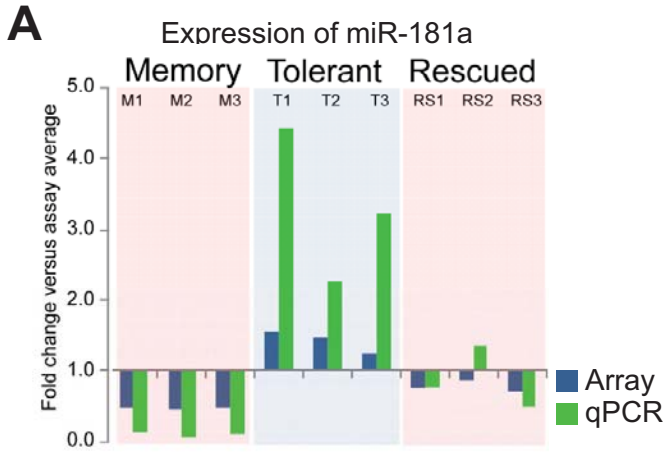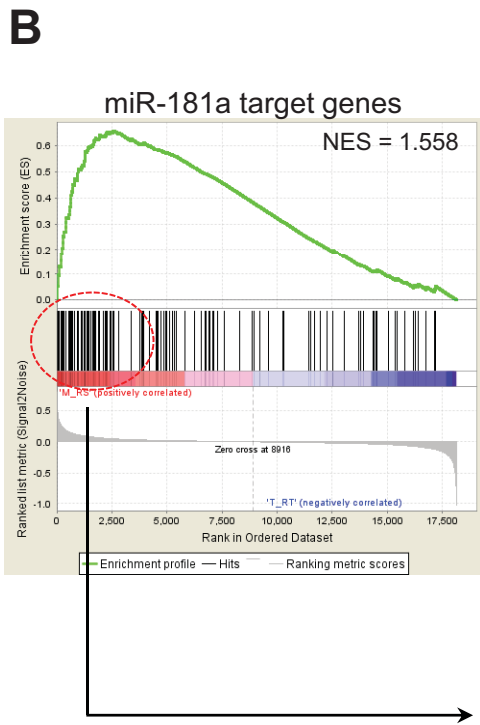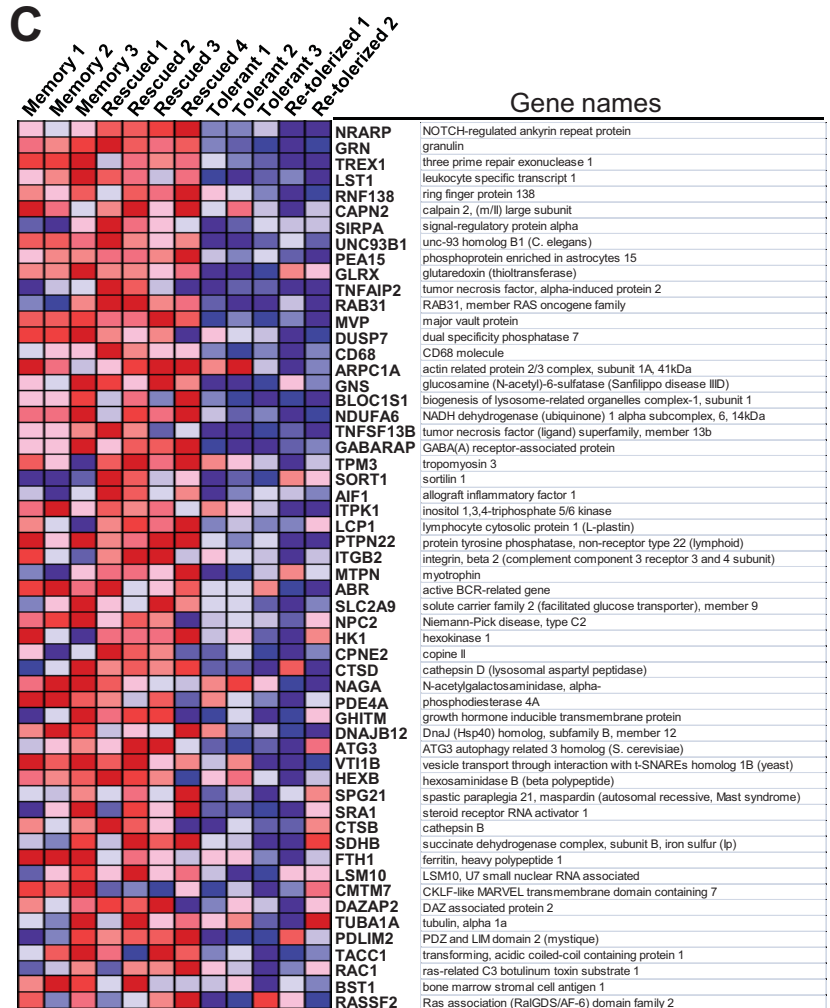

D

|    | GENE SYMBOL | GENE TITLE                                                             | RANK IN GENE LIST | RANK METRIC SCORE | RUNNING ES  | CORE ENRICHMEN |
|----|-------------|------------------------------------------------------------------------|-------------------|-------------------|-------------|----------------|
| 1  | NRARP       | NOTCH-regulated ankyrin repeat protein                                 | 21                | 0.52769357        | 0.054924488 | Yes            |
| 2  | GRN         | granulin                                                               | 58                | 0.421000153       | 0.0976755   | Yes            |
| 3  | TREX1       | three prime repair exonuclease 1                                       | 111               | 0.327860177       | 0.12963817  | Yes            |
| 4  | LST1        | leukocyte specific transcript 1                                        | 185               | 0.273305655       | 0.15463631  | Yes            |
| 5  | RNF138      | ring finger protein 138                                                | 189               | 0.270939112       | 0.18326876  | Yes            |
| 6  | CAPN2       | calpain 2, (m//l) large subunit                                        | 240               | 0.239159524       | 0.20591417  | Yes            |
| 7  | SIRPA       | signal-regulatory protein alpha                                        | 263               | 0.22981751        | 0.22912094  | Yes            |
| 8  | UNC93B1     | unc-93 homolog B1 (C. elegans)                                         | 273               | 0.224938184       | 0.25253072  | Yes            |
| 9  | PEA15       | phosphoprotein enriched in astrocytes 15                               | 341               | 0.201225147       | 0.27020028  | Yes            |
| 10 | GLRX        | glutaredoxin (thioltransferase)                                        | 393               | 0.188874766       | 0.28744525  | Yes            |
| 11 | TNFAIP2     | tumor necrosis factor, alpha-induced protein 2                         | 395               | 0.188079283       | 0.30738127  | Yes            |
| 12 | RAB31       | RAB31, member RAS oncogene family                                      | 431               | 0.18020156        | 0.32459256  | Yes            |
| 13 | MVP         | major vault protein                                                    | 522               | 0.165655762       | 0.33720452  | Yes            |
| 14 | DUSP7       | dual specificity phosphatase 7                                         | 567               | 0.158645526       | 0.35162494  | Yes            |
| 15 | CD68        | CD68 molecule                                                          | 598               | 0.152968004       | 0.366219    | Yes            |
| 16 | ARPC1A      | actin related protein 2/3 complex, subunit 1A, 41kDa                   | 613               | 0.150940463       | 0.3814858   | Yes            |
| 17 | GNS         | glucosamine (N-acetyl)-6-sulfatase (Sanfilippo disease IIID)           | 620               | 0.149765104       | 0.39707172  | Yes            |
| 18 | BLOC1S1     | biogenesis of lysosome-related organelles complex-1, subunit 1         | 649               | 0.145250753       | 0.41095656  | Yes            |
| 19 | NDUFA6      | NADH dehydrogenase (ubiquinone) 1 alpha subcomplex, 6, 14kDa           | 692               | 0.139742091       | 0.42347866  | Yes            |
| 20 | TNFSF13B    | tumor necrosis factor (ligand) superfamily, member 13b                 | 720               | 0.136379555       | 0.43647605  | Yes            |
| 21 | GADARAP     | GADA(A) receptor-associated protein                                    | 725               | 0.135660012       | 0.45067302  | Yes            |
| 22 | TPM3        | tropomyosin 3                                                          | 785               | 0.128673092       | 0.4610757   | Yes            |
| 23 | SORT1       | sortilin 1                                                             | 805               | 0.127180308       | 0.47353935  | Yes            |
| 24 | AIF1        | allograft inflammatory factor 1                                        | 918               | 0.116156392       | 0.4796686   | Yes            |
| 25 | ITPK1       | inositol 1,3,4-triphosphate 5/6 kinase                                 | 939               | 0.114958584       | 0.49077767  | Yes            |
| 26 | LCP1        | lymphocyte cytosolic protein 1 (L-plastin)                             | 955               | 0.114189558       | 0.5020826   | Yes            |
| 27 | PTPN22      | protein tyrosine phosphatase, non-receptor type 22 (lymphoid)          | 996               | 0.111047804       | 0.5116657   | Yes            |
| 28 | ITGB2       | integrin, beta 2 (complement component 3 receptor 3 and 4 subunit)     | 1097              | 0.104847699       | 0.51725906  | Yes            |
| 29 | MTPN        | myotrophin                                                             | 1169              | 0.100758575       | 0.52402765  | Yes            |
| 30 | ABR         | active BCR-related gene                                                | 1223              | 0.097706407       | 0.531471    | Yes            |
| 31 | SLC2A0      | solute carrier family 2 (facilitated glucose transporter), member 0    | 1256              | 0.095021470       | 0.5398904   | Yes            |
| 32 | NPC2        | Niemann-Pick disease, type C2                                          | 1263              | 0.095445111       | 0.5497025   | Yes            |
| 33 | HK1         | hexokinase 1                                                           | 1274              | 0.094981469       | 0.55924326  | Yes            |
| 34 | CPNE2       | copine II                                                              | 1289              | 0.094417147       | 0.568502    | Yes            |
| 35 | CTSD        | cathepsin D (lysosomal aspartyl peptidase)                             | 1291              | 0.094293579       | 0.5784692   | Yes            |
| 36 | NAGA        | N-acetylgalactosaminidase, alpha-                                      | 1386              | 0.089298509       | 0.5827429   | Yes            |
| 37 | PDE4A       | phosphodiesterase 4A                                                   | 1399              | 0.088441409       | 0.59147745  | Yes            |
| 38 | GHITM       | growth hormone inducible transmembrane protein                         | 1471              | 0.084994152       | 0.59657043  | Yes            |
| 39 | DNAJB12     | DnaJ (Hsp40) homolog, subfamily B, member 12                           | 1565              | 0.080411144       | 0.5999549   | Yes            |
| 40 | ATG3        | ATG3 autophagy related 3 homolog (S. cerevisiae)                       | 1636              | 0.077318452       | 0.60428745  | Yes            |
| 41 | VTI1B       | vesicle transport through interaction with t-SNAREs homolog 1B (yeast) | 1667              | 0.076081924       | 0.6107091   | Yes            |
| 42 | HEXB        | hexosaminidase B (beta polypeptide)                                    | 1679              | 0.075786002       | 0.618154    | Yes            |
| 43 | SPG21       | spastic paraplegia 21, maspardin (autosomal recessive, Mast syndrome)  | 1722              | 0.074025944       | 0.6236909   | Yes            |
| 44 | SRA1        | steroid receptor RNA activator 1                                       | 1743              | 0.072968312       | 0.6303367   | Yes            |
| 45 | CTSB        | cathepsin B                                                            | 1913              | 0.066194147       | 0.62799114  | Yes            |
| 46 | SDHB        | succinate dehydrogenase complex, subunit B, iron sulfur (lp)           | 1926              | 0.065721504       | 0.6343107   | Yes            |
| 47 | FTH1        | ferritin, heavy polypeptide 1                                          | 1931              | 0.065551423       | 0.64105636  | Yes            |
| 48 | LSM10       | LSM10, U7 small nuclear RNA associated                                 | 2095              | 0.060444389       | 0.6384326   | Yes            |
| 49 | CMTM7       | CKLF-like MARVEL transmembrane domain containing 7                     | 2181              | 0.058230128       | 0.63990355  | Yes            |
| 50 | DAZAP2      | DAZ associated protein 2                                               | 2235              | 0.056818902       | 0.6430009   | Yes            |
| 51 | TUBA1A      | tubulin, alpha 1a                                                      | 2250              | 0.056404322       | 0.6482191   | Yes            |
| 52 | PDLIM2      | PDZ and LIM domain 2 (mystique)                                        | 2278              | 0.055888023       | 0.6526608   | Yes            |
| 53 | TACC1       | transforming, acidic coiled-coil containing protein 1                  | 2395              | 0.052636098       | 0.6518162   | Yes            |
| 54 | RAC1        | ras-related C3 botulinum toxin substrate 1                             | 2480              | 0.050786909       | 0.6525515   | Yes            |
| 55 | BST1        | bone marrow stromal cell antigen 1                                     | 2542              | 0.0495685         | 0.654434    | Yes            |
| 56 | RASSF2      | Ras association (RalGDS/AF-6) domain family 2                          | 2604              | 0.048371717       | 0.6561893   | Yes            |

**Supplementary Figure 8: miR-181a expression and enrichment of miR-181a predicted target genes in TCR<sub>GAG</sub> CD8 T cells.** **(A)** Comparison of miR-181a expression determined by microRNA array (blue) and qRT-PCR (green). The diagram shows the average fold change between average for each assay and the different T cell samples [memory (M1, M2, M3), tolerant (T1, T2, T3), rescued (RS1, RS2, RS3)]. A fold change higher than one indicates up-regulation, and a fold change less than one a down-regulation in the samples compared to the assay average. **(B)-(D)** Gene set enrichment analysis (GSEA) of miR-181a predicted target genes. Predicted target genes were compiled from published reports (27, 40, 41). A total of 124 target genes were compared to microarray data from memory, tolerant, rescued and re-tolerized TCR<sub>GAG</sub> CD8 T cell samples. **(B)** Gene set enrichment plot showing skewing to the left, indicating enrichment of predicted target genes for memory, tolerant, rescued and re-tolerized T cells. NES, normalized enrichment score. Nominal p-value 0.015. **(C)** Corresponding heat map displaying the correlation of the 56 most enriched genes with mRNA target expression levels inversely correlated with miR-181a expression levels. Expression levels are represented as a gradient from high (red) to low (blue). Individual genes including ranked metric score and ES are listed in **(D)**.

## Supplementary Figure 9

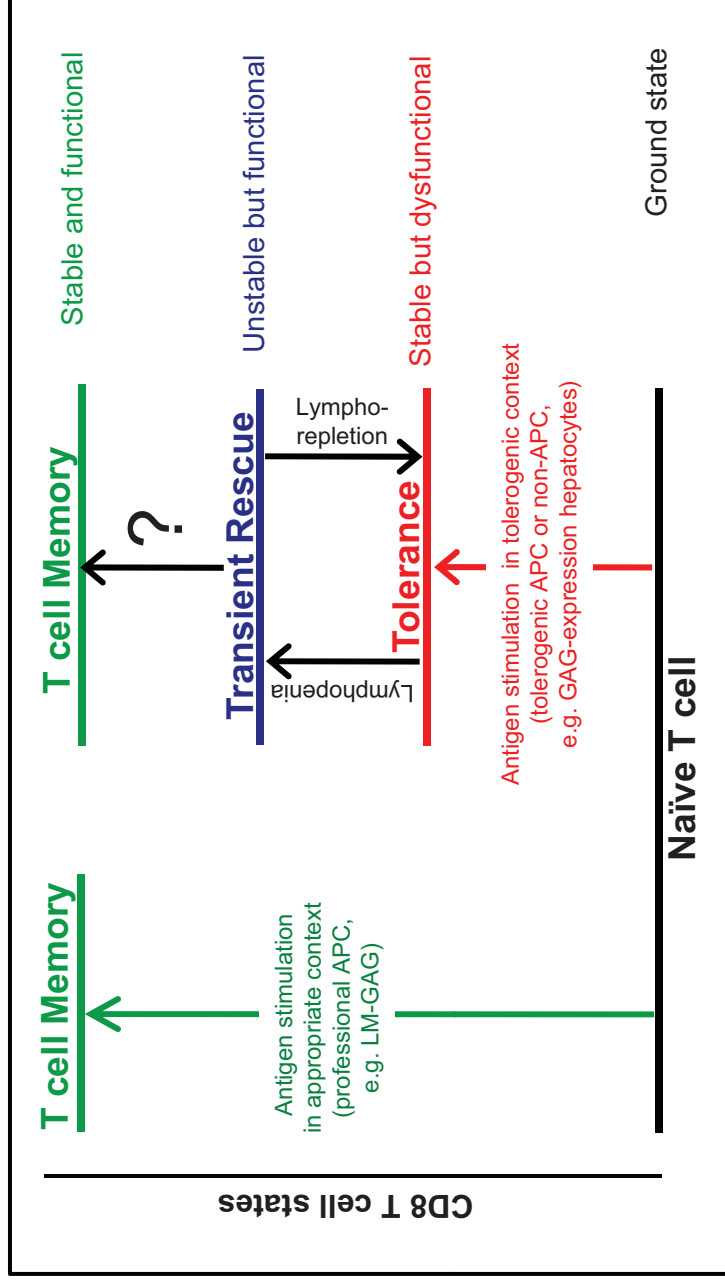

**Supplementary Figure 9: Model for peripheral CD8 T cell tolerance.** Naïve peripheral CD8 T cells, when triggered by antigen, can transition into distinct T cell states depending on the conditions as indicated: (Left) A first encounter with (foreign) antigen presented on professional antigen presenting cells (APC) frequently results in the generation of long-lived memory CD8 T cells (e.g. naïve TCR<sub>GAG</sub> CD8 T cells become memory T cells after LM-GAG infection). Memory CD8 T cells are functional. (Right) Peripheral naïve CD8 T cells that encounter (self-) antigen under tolerogenic conditions can be deleted (not shown) or become tolerant and dysfunctional. The initial encounter(s) with (self-) antigen in the periphery results in the establishment of a tolerance-specific program associated with functional unresponsiveness. The tolerance-program can be temporarily overridden under lymphopenic conditions and tolerant T cells become transiently rescued, but it is eventually reasserted in lymphoreplete hosts and rescued T cells return to their imprinted, tolerant state (epigenetic memory). The model of stable and unstable T cell states and T cell plasticity has been adapted from the review by K.M. Murphy and B. Stockinger (42).

**Supplementary Table S1:** Full list of genes in each K-means cluster. Log<sub>2</sub>-transformed expression intensities that were mean-centered at the probe level for naïve, memory, tolerant, rescued and re-tolerized T cells are shown.



Supplementary Table 1

| Cluster | Probe ID | Target ID     | Naive      | Memory     | Tolerant  | Rescued    | Re-tolerizad |
|---------|----------|---------------|------------|------------|-----------|------------|--------------|
| 1       | 2870132  | PLEKHG2       | 0.8018009  | -0.428892  | 0.0632551 | -0.8980818 | 0.13529004   |
| 1       | 3190731  | PRICKLE1      | 0.48148066 | -0.7762711 | 0.1907616 | -0.5478571 | 1.0437983    |
| 1       | 5700017  | ITGAE         | 2.3588505  | -0.7984876 | -0.448296 | 0.2259299  | 0.7723071    |
| 1       | 5700632  | TRAT1         | 1.1955078  | -0.4532592 | -0.036097 | -0.0587368 | 0.46185258   |
| 1       | 5720239  | INPP5F        | 0.37912115 | -0.3214806 | 0.1053727 | -0.6270103 | 0.61737794   |
| 1       | 6450471  | ITGAE         | 2.377154   | -0.4853267 | -0.155947 | 0.39544135 | 0.7843138    |
| 1       | 20553    | CEP97         | 0.8881087  | -0.0094054 | 0.0070132 | -0.1768393 | 0.57109833   |
| 1       | 150372   | RASL11B       | 0.8388532  | -0.3278843 | 0.1029604 | -0.7017528 | 1.1419865    |
| 1       | 290341   | RASL11B       | 1.008759   | -0.2487633 | 0.2905285 | -0.5563425 | 1.3037854    |
| 1       | 540202   | TTC3          | 0.41567135 | -0.621565  | 0.1060438 | -0.3854678 | 0.632823     |
| 1       | 610274   | FADS1         | 0.57673985 | 0.06997927 | -0.11154  | -0.5858762 | 0.7615062    |
| 1       | 630091   | NFKBID        | 0.11534373 | -0.1858197 | 0.0853166 | -1.0431087 | 0.3689468    |
| 1       | 1110719  | FRMD6         | 0.70148575 | -0.1312694 | 0.0285966 | -0.6324747 | 1.1053064    |
| 1       | 1570373  | CSNK1E        | 0.86376375 | -0.1502244 | 0.220851  | -0.3526485 | 0.45887974   |
| 1       | 1660474  | CSNK1E        | 0.7679985  | -0.420868  | 0.1520601 | -0.4162918 | 0.51179487   |
| 1       | 2140706  | ACVR2B        | 1.2439562  | -0.181673  | 0.0289042 | -0.1405826 | 0.5859289    |
| 1       | 2470465  | MDK           | 0.9085245  | -0.0945939 | 0.7964716 | -0.4163674 | 0.41895178   |
| 1       | 2480475  | SESN1         | 0.6792052  | -0.5229772 | 0.0950666 | -0.638139  | 0.2633572    |
| 1       | 2570008  | IVNS1ABP      | 0.24770916 | -0.8085313 | 0.2112749 | -0.2887533 | 0.13935125   |
| 1       | 2570131  | DLG3          | 0.7153892  | -0.1023802 | 0.0798123 | -0.3108139 | 1.1832613    |
| 1       | 2570435  | 4631426J05RIK | 0.4041749  | -0.66827   | -0.019188 | -0.1815527 | 0.6812899    |
| 1       | 2690070  | FBLN1         | 0.25331283 | -0.7516553 | 0.2650927 | -0.386355  | 0.62971485   |
| 1       | 2810280  | LOC100047856  | 1.1529646  | -0.2418921 | -0.017605 | -0.4092597 | 1.5026354    |
| 1       | 2900373  | 1190002H23RIK | 1.9152033  | -0.5981559 | 0.1665595 | -1.9895834 | 1.3779511    |
| 1       | 2900474  | LTA           | 0.39848738 | -0.1225137 | 0.1566144 | -0.6079359 | 0.15211368   |
| 1       | 3107379  | CCL27         | 0.41318982 | -0.0965137 | 0.0117217 | -0.8605808 | 0.15105592   |
| 1       | 3190681  | SV2A          | 1.0624876  | -0.568151  | 0.4314072 | -0.4123106 | 0.27742603   |
| 1       | 3370487  | EXT1          | 0.9045303  | -0.0179992 | 0.0472379 | -0.3331347 | 1.1021596    |
| 1       | 3390341  | TMEM87A       | 0.6679825  | -0.4641398 | -0.009678 | -0.0161636 | 0.46247116   |
| 1       | 3440397  | MATK          | 1.3003168  | 0.07529158 | -0.146828 | -0.6216791 | 0.50897247   |
| 1       | 3460142  | BACH2         | 0.56303596 | -0.0388804 | 0.0473324 | -0.5100122 | 0.6632082    |
| 1       | 4010243  | RAMP1         | 1.3666203  | -2.0124867 | 0.0684826 | -0.8998017 | 1.5443537    |
| 1       | 4060239  | PLEKHG2       | 0.8181907  | -0.2411259 | 0.1241456 | -0.8904056 | 0.10640948   |
| 1       | 4060593  | VANGL2        | 0.25841668 | -0.9743664 | 0.1583713 | -0.5227124 | 1.2285708    |
| 1       | 4180491  | KCNMB4        | 0.75762504 | -0.1304188 | 0.0898311 | -0.2618802 | 0.73865366   |
| 1       | 4280402  | EPHX1         | 0.46725988 | -2.1699574 | 0.0925976 | -1.0510663 | 1.3071985    |
| 1       | 4290273  | AMPD1         | 1.5937355  | -1.4370389 | 0.3381265 | -0.424187  | -0.01637838  |
| 1       | 4290609  | ADCY6         | 1.1193453  | -0.7183687 | 0.2438435 | -0.6426052 | 0.6348519    |
| 1       | 4860379  | DUSP2         | 1.0882053  | -0.1765012 | 0.1190957 | -0.3112592 | 0.3267282    |
| 1       | 4880253  | JMJD3         | 0.67533094 | -0.7289099 | 0.2122255 | -0.5422794 | 0.3827848    |
| 1       | 4890022  | TTC3          | 0.4105568  | -0.6851057 | 0.0072602 | -0.1482116 | 0.97230566   |
| 1       | 4900632  | RCAN3         | 1.3034546  | -0.0158006 | -0.078364 | -0.4264614 | 0.6695535    |
| 1       | 4920424  | JMJD3         | 0.60211265 | -0.6318017 | 0.0780334 | -0.5121642 | 0.5364411    |
| 1       | 5130450  | USP6NL        | 0.11843861 | -0.9211223 | 0.1628048 | -0.8130905 | 1.225928     |
| 1       | 5390398  | JARID1D       | 0.52076924 | -0.5319055 | -0.049998 | 0.07200626 | 0.83284116   |
| 1       | 5550356  | GTF2IRD1      | 0.77324176 | -0.3510335 | 0.1195403 | -0.095476  | 0.5986678    |
| 1       | 5860296  | RASGRP1       | 0.5368891  | -0.4803597 | 0.2490036 | -0.338333  | 0.41579652   |
| 1       | 5910239  | ENG           | 0.31544235 | -0.7465336 | 0.1902012 | -0.7338076 | 0.27234238   |
| 1       | 6060646  | PRX2          | 0.9127204  | -0.079587  | 0.1491135 | -0.1369453 | 0.33154312   |
| 1       | 6300610  | XKRKX         | 1.7735167  | -0.7307276 | 0.1131985 | -0.6641933 | 0.95774525   |
| 1       | 6450056  | SOLE          | 0.45867026 | 0.26307464 | -0.778443 | -0.975629  | 0.31528986   |
| 1       | 6620079  | EGR1          | 0.70591086 | -1.5391787 | 0.1556476 | -0.9305695 | 1.4714879    |
| 1       | 7040195  | GPR83         | 2.4719543  | -1.273799  | 0.1672676 | -0.4477192 | 1.1957731    |
| 1       | 7100687  | ITGAE         | 2.8026774  | -1.6096157 | -0.750379 | 0.02768894 | 1.462209     |
| 1       | 7210072  | IRF6          | 0.96485806 | -0.3722287 | 0.0603718 | -0.2804379 | 0.9294641    |
| 1       | 7320139  | IFT80         | 0.54156303 | -0.7262937 | 0.232917  | -0.8732254 | 0.84522814   |
| 1       | 7330026  | EGR2          | 0.8951821  | -0.9712015 | 0.3365504 | -0.4925921 | 2.2748318    |
| 1       | 7610239  | 2510009E07RIK | 0.5211278  | -0.6094481 | -0.533715 | 0.14082666 | 1.4153204    |
| 1       | 130634   | DDIT4         | 1.3910939  | -0.376381  | -0.524397 | 0.04905623 | 0.18583256   |
| 1       | 160484   | SV2A          | 1.3043916  | -0.5354812 | 0.5616949 | -0.2063511 | 0.36696762   |
| 1       | 520196   | ITGAE         | 2.754341   | -1.6264517 | -0.758647 | 0.08013526 | 1.4379636    |
| 1       | 580379   | TTC3          | 0.4571378  | -0.6701853 | 0.0610247 | -0.2303334 | 0.8513744    |
| 1       | 610671   | AMPD1         | 1.3727782  | -1.1203685 | 0.2678575 | -0.3533559 | 0.08436439   |
| 1       | 650609   | TPCN1         | 0.79683894 | -0.1228108 | 0.1640049 | -0.3226422 | 0.4562145    |
| 1       | 780671   | TRAT1         | 1.4428408  | -1.5288825 | -0.289439 | -0.3111985 | 1.3345236    |
| 1       | 1010296  | TUBB2B        | 1.127433   | -0.5559389 | 0.0601501 | -0.2327091 | 1.0204176    |
| 1       | 1030133  | TUBB2B        | 0.33474636 | -2.1921475 | 0.3739117 | -0.9374247 | 2.2369561    |
| 1       | 1090903  | TTC3          | 0.4309545  | -0.6357225 | 0.1022983 | -0.2496075 | 0.83661926   |
| 1       | 1170521  | DUSP2         | 0.79973185 | -0.0998848 | 0.0866004 | -0.4418083 | 0.29515368   |
| 1       | 1190592  | PARP6G        | 0.38368946 | -0.7071417 | 0.0787735 | -0.2156478 | 0.83156675   |
| 1       | 1240551  | LRRC1         | 0.76732934 | -0.0667942 | 0.0113038 | -0.2957105 | 0.40964842   |
| 1       | 1300059  | ITGAE         | 2.112571   | -0.2512685 | -0.164225 | 0.1924351  | 1.7106191    |
| 1       | 1340349  | SSBP3         | 0.65441585 | -0.7839968 | 0.2742478 | -0.3910944 | 1.3391068    |
| 1       | 1430368  | ST6GAL1       | 0.33634575 | -0.8654459 | 0.1479386 | -0.1456489 | 0.3100385    |
| 1       | 1440286  | HECTD2        | 0.4734605  | -0.6306888 | 0.1630988 | -0.3674138 | 0.18034273   |
| 1       | 4050626  | TNF           | 0.22615589 | -0.2202564 | 0.1186467 | -0.9994846 | 0.23995203   |
| 1       | 1440739  | RNF19A        | 0.38635588 | -0.665993  | 0.0491247 | -0.5695642 | 1.0240266    |
| 1       | 1570725  | DSCR1L2       | 1.1976281  | 0.03311677 | -0.081498 | -0.394302  | 0.65766925   |
| 1       | 1770519  | TCF25         | 0.3103668  | -0.3150619 | 0.1692824 | -0.7878287 | 0.08553292   |
| 1       | 1850082  | CSRNP2        | 1.3399237  | -0.2319983 | 0.1286378 | -0.3358237 | 0.5415284    |
| 1       | 2070152  | TIMP2         | 0.83782583 | -0.035937  | -0.25034  | 0.02270594 | 1.1515279    |
| 1       | 2100243  | KIF1B         | 0.747985   | -0.8084226 | -0.072465 | -0.0886659 | 0.0579876    |
| 1       | 2230070  | TMEM108       | 0.90322965 | -0.4530796 | 0.0202815 | 0.08964189 | -0.00441309  |
| 1       | 2350440  | GPR68         | 0.88460803 | 0.03224373 | -0.369587 | -0.1343798 | 0.27359274   |
| 2       | 1030519  | ID2           | -0.2621223 | 0.99765503 | -0.221017 | 0.7049803  | -0.35680678  |
| 2       | 1110326  | FCGR2B        | -0.2118132 | 1.0683037  | -0.033943 | 0.4979016  | -0.07451714  |
| 2       | 3310189  | CST7          | -0.4580198 | 0.79344386 | -0.170302 | 0.629477   | -0.306268    |
| 2       | 3440132  | SMPDL3B       | -1.4734874 | 2.408794   | -0.277435 | 1.0382475  | -0.19338875  |
| 2       | 5560754  | LY6D          | -0.3947854 | 1.9181828  | -0.807915 | 0.40375826 | 0.2749083    |
| 2       | 6940187  | NRP1          | -0.3426279 | 1.5092454  | -0.124975 | 0.03320022 | 2.1929953    |
| 2       | 20465    | SRPK3         | -0.0669757 | 1.5948634  | -0.11548  | 0.095549   | 0.058498394  |
| 2       | 650707   | H2-AA         | -1.415979  | 2.1624398  | -0.772342 | 1.0818133  | 0.3881212    |
| 2       | 670703   | FCRLA         | -0.2301906 | 2.1462042  | -0.269809 | 0.832072   | 0.30071986   |
| 2       | 1010132  | CCR6          | -0.2223467 | 1.5125874  | -0.139576 | 0.3936404  | 0.1924398    |
| 2       | 1240538  | P2RY14        | -0.2296907 | 0.8078909  | -0.041186 | 0.3505406  | -0.02666731  |
| 2       | 1260164  | ASNS          | -0.5263515 | 1.1578513  | -0.0953   | 0.6562173  | -0.25614932  |
| 2       | 1260477  | FCRLA         | -0.2862084 | 1.7769675  | -0.167592 | 0.5822335  | 0.15625635   |
| 2       | 1340553  | LOC100047815  | -0.6041209 | 1.7042191  | -0.546491 | 0.3009582  | 0.13599828   |
| 2       | 1440307  | H2-AB1        | -1.7285977 | 1.9574854  | -1.081012 | 1.1458714  | -0.3491888   |
| 2       | 1820037  | RASL12        | -0.5077106 | 1.4098238  | -0.059175 | 0.1228979  | -0.34990352  |
| 2       | 1880411  | ARRDC3        | -0.1125518 | 1.1020321  | 0.0238553 | -0.0094436 | 0.24767856   |
| 2       | 1890546  | FAIM3         | -1.7088625 | 2.8155851  | -1.604732 | 0.8459365  | 0.41579634   |
| 2       | 2120392  | CYP4F18       | -0.2008844 | 1.017208   | -0.178501 | 0.5616507  | -0.04888338  |
| 2       | 2510646  | LY6D          | -0.3294037 | 1.747707   | -0.521821 | 0.2164593  | 0.37087592   |
| 2       | 2630463  | CITA          | -0.453339  | 0.984656   | -0.138047 | 0.38650793 | 0.028498165  |
| 2       | 2710520  | TNFRSF13C     | -0.4102783 | 1.3086666  | -0.138885 | 0.2683429  | -0.08096335  |
| 2       | 2750706  | FCER2A        | -0.1285973 | 1.5857992  | 0.0073374 | 0.27013367 | -0.03153205  |
| 2       | 3140491  | BLK           | -0.1423258 | 1.058905   | -0.166872 | 0.21020935 | 0.11049039   |
| 2       | 3290279  | BLK           | -0.3626047 | 1.3716393  | -0.409875 | 0.30958217 | -0.05890627  |
| 2       | 3310438  | GNPTAB        | -0.5737653 | 0.7114746  | -0.068477 | 0.46949828 | -0.21315351  |
| 2       | 3450482  | H2-DMB2       | -0.0404825 | 1.2876958  | -0.20531  | 0.39583564 | 0.01219363   |
| 2       | 3870047  | CTSH          | -0.7626274 | 1.1615129  | -0.514242 | 1.0820864  | -0.10897806  |
| 2       | 3890274  | SCD1          | -0.2795542 | 2.3059523  | -0.23519  | 0.52314526 | 0.2767346    |
| 2       | 4050093  | FCRLA         | -0.181744  | 1.7749143  | -0.166073 | 0.38291737 | 0.14887759   |
| 2       | 4290180  | CASP4         | -0.5262026 | 1.2127475  | -0.199162 | 0.0816417  | 0.5802786    |
| 2       | 4490709  | GZMK          | -0.0101881 | 1.4531571  | -0.112855 | -0.0206572 | 0.34173152   |
| 2       | 4570463  | KCNK5         | -1.0010993 | 2.610963   | -0.403864 | 0.85898405 | -0.02591835  |
| 2       | 4760241  | CD40          | -0.1539865 | 1.2544303  | -0.021475 | 0.38139403 | 0.045563955  |
| 2       | 4780047  | B3GNT8        | -0.1294624 | 1.192972   | -0.174633 | 0.42042917 | 0.089328215  |
| 2       | 4830551  | NAPSA         | -0.5826257 | 1.0228887  | -0.470186 | 0.7909786  | -0.29851174  |
| 2       | 4900500  | VPREB3        | -0.180333  | 1.0937319  |           |            |              |

|   |         |                   |            |             |           |            |             |
|---|---------|-------------------|------------|-------------|-----------|------------|-------------|
| 2 | 6020224 | IL4I1             | -0.2491837 | 1.5663941   | -0.164792 | 0.3208465  | 0.21153186  |
| 2 | 6020487 | LOC100044439      | -0.4931661 | 1.9471418   | -0.274344 | 1.1974484  | 0.067621484 |
| 2 | 6370164 | KCNK5             | -0.3708322 | 1.0385724   | -0.249377 | 0.05963286 | 0.04440363  |
| 2 | 7210672 | 2010001M09RIK     | -1.1343588 | 1.5712336   | -1.150187 | 0.93860483 | 0.2661818   |
| 2 | 7320576 | MANSC1            | -0.1505263 | 0.8738996   | -0.135422 | 0.40203646 | -0.19124858 |
| 2 | 7570537 | LMO2              | -0.6314372 | 1.2627714   | -0.30072  | 0.82397294 | -0.18432428 |
| 2 | 360743  | NRP1              | -0.4310794 | 1.3842376   | -0.167403 | -0.0627898 | 2.0274916   |
| 2 | 380398  | NAPSA             | -0.9241345 | 1.3810921   | -0.555122 | 0.9852623  | -0.10882019 |
| 2 | 430167  | LY86              | -0.6814998 | 1.1986059   | -0.333129 | 1.0600072  | -0.25186363 |
| 2 | 430703  | RNASE6            | -0.4948967 | 0.85891704  | -0.050702 | 0.70473105 | -0.08491256 |
| 2 | 460692  | FKL11A            | -0.1846274 | 1.118038    | -0.041085 | 0.405534   | 0.030720105 |
| 2 | 1740992 | FASL              | -0.7786429 | 1.650161    | -0.044532 | 1.9688589  | -0.44881217 |
| 2 | 2000246 | GRN               | -0.321204  | 1.0668877   | -0.09861  | 1.2257752  | -0.42830566 |
| 2 | 7610451 | BZRAP1            | 0.00521939 | 0.30231687  | 1.4806492 | -0.263243  | -0.20873709 |
| 3 | 3365020 | TMEM49            | -0.749862  | 0.582163    | 0.4618087 | -0.0960062 | 0.051072903 |
| 3 | 3370452 | HIST1H4K          | -0.2992219 | 0.719589    | 0.9265488 | -0.3091306 | 0.42811868  |
| 3 | 3450373 | XIST              | 0.28981265 | 1.8143076   | 1.7328439 | -0.0069916 | -0.3319327  |
| 3 | 3870630 | HIST1H4J          | -0.6692572 | 0.43044913  | 0.9731709 | -0.8916195 | 0.6521201   |
| 3 | 4040187 | HIST1H4C          | -0.2185195 | 0.8687187   | 0.4270525 | -0.4192862 | -0.087669   |
| 3 | 5690358 | MAPK11            | -0.7549804 | 0.53758186  | 0.3637483 | -0.7555864 | 0.7361259   |
| 3 | 6860347 | HIST1H4F          | -0.6653771 | 0.05770238  | 0.6328816 | -0.4650026 | 0.45305437  |
| 3 | 150291  | HIST1H4M          | -0.4037668 | 0.6911619   | 0.8555322 | -0.3311033 | 0.26476002  |
| 3 | 1990021 | ENSMUSG0000068790 | -0.4093004 | 0.85440373  | 1.526336  | -0.3458625 | 0.50053626  |
| 3 | 2850403 | MID1              | -0.4478229 | 0.16124372  | 0.6500887 | -0.2353573 | -0.30264094 |
| 3 | 6250541 | HIST1H4I          | -0.5963997 | 0.13346857  | 0.6900402 | -0.528684  | 0.6829517   |
| 3 | 6200598 | 8430432M10RIK     | 0.14245045 | -0.4535564  | 0.1540216 | -1.8876606 | -1.6154451  |
| 4 | 6220044 | DENND1C           | 0.18989293 | -0.2302207  | 0.226657  | -1.0960276 | -1.3946998  |
| 4 | 6400551 | ANKS3             | 0.24555436 | -0.6532263  | 0.0587213 | -2.2482784 | -2.1185284  |
| 4 | 6450059 | BC037034          | 0.37763274 | 0.06054187  | 0.2586939 | -0.6540876 | -1.4405936  |
| 4 | 6650458 | NFKBIZ            | 0.37463903 | -0.4535304  | 0.1650257 | -1.1409076 | -0.7962871  |
| 4 | 6660292 | SPO11             | 0.14801171 | -0.5086518  | 0.1846568 | -1.562006  | -1.5020666  |
| 4 | 6760706 | NISCH             | 0.09782045 | -0.5671967  | 0.0999389 | -1.6892773 | -0.901912   |
| 4 | 6770630 | MIB2              | 0.14923905 | 0.34866953  | 0.2745731 | -0.9484683 | -1.3498807  |
| 4 | 6860082 | SNAPC3            | 0.28442764 | -0.1985661  | 0.1005345 | -1.2420337 | -1.2763355  |
| 4 | 6940132 | A230050P20RIK     | 0.03057565 | -0.0601639  | 0.3765081 | -1.2150489 | -0.8310828  |
| 4 | 6960095 | OGT               | 0.25181246 | -0.1691399  | 0.2220724 | -1.3854883 | -0.97099745 |
| 4 | 6960377 | LRRF1P1           | 0.2327682  | -0.0651147  | 0.20185   | -1.3796851 | -1.9488506  |
| 4 | 7000324 | 2410002F23RIK     | 0.05262963 | -0.1561088  | 0.2787953 | -1.2165901 | 1.600354    |
| 4 | 7050113 | LRRC45            | 0.09908281 | -0.2055515  | 0.0436706 | -0.9904573 | -0.6444452  |
| 4 | 7050577 | CLK4              | 0.34992138 | -0.4276781  | 0.2059236 | -1.321965  | -1.2209005  |
| 4 | 7100292 | ATP13A1           | 0.15406197 | -0.0772497  | 0.2427935 | -0.0780927 | -1.0204582  |
| 4 | 7150315 | ZFP692            | 0.1445636  | -0.2571031  | 0.2040362 | -1.5836259 | -1.6146104  |
| 4 | 7160192 | 1600016N20RIK     | 0.09681431 | 0.16837981  | 0.5641888 | -1.4365605 | -1.5617807  |
| 4 | 7560097 | NARG2             | 0.24790609 | 0.04325955  | 0.2112325 | -0.9405766 | -0.7762265  |
| 4 | 7610390 | TRPC2             | 0.583308   | -0.3943833  | 0.3258455 | -1.256312  | -1.1399654  |
| 4 | 7650167 | CHKB              | 0.27622867 | -0.5294365  | 0.2035658 | -1.5170431 | -1.2956282  |
| 4 | 50368   | RBM5              | 0.3196106  | -0.308735   | 0.1348492 | -0.7092502 | -0.37792128 |
| 4 | 60041   | IL11RA1           | 0.44539836 | -0.4771768  | 0.0611847 | -2.0899909 | -1.1174476  |
| 4 | 110577  | TARDBP            | 0.6041564  | -0.2024324  | 0.271651  | -1.3018173 | -1.3623227  |
| 4 | 150136  | RAB24             | 0.16336012 | 0.10374112  | 0.0591854 | -0.9174655 | -1.1293597  |
| 4 | 290520  | OGT               | 0.10958798 | -0.4611552  | 0.3178518 | -1.6256772 | -1.5985354  |
| 4 | 360097  | SNORA65           | 0.27885124 | -0.1953662  | 0.1054768 | -1.5720088 | -1.8201658  |
| 4 | 380196  | HNRPL             | 0.46345115 | -0.5305883  | 0.3082635 | -1.9384363 | -1.5622095  |
| 4 | 450333  | RTLE1             | 0.20371969 | -0.1916214  | 0.0901614 | -1.0777204 | -0.9665457  |
| 4 | 510093  | SFXN4             | 0.27445635 | 0.10255134  | 0.128567  | -1.0095037 | -0.31459036 |
| 4 | 510524  | SBF1              | 0.32016593 | -0.0899564  | 0.2942771 | -0.7680644 | -0.6385918  |
| 4 | 520189  | ZC3H7A            | 0.13969289 | -0.2478331  | 0.2871344 | -0.9830587 | -1.1577289  |
| 4 | 540239  | TNRC6A            | 0.422179   | -0.0801111  | 0.1122977 | -1.1293911 | -0.90101796 |
| 4 | 580341  | SLC35B3           | 0.40912402 | -0.1717453  | 0.0634955 | -0.9553856 | -0.73833644 |
| 4 | 730300  | 2810403A07RIK     | 0.4532161  | -0.3545948  | 0.0786897 | -1.0023334 | -0.86234456 |
| 4 | 730725  | AKAP9             | 0.30451706 | -0.3641129  | 0.1292992 | -0.9581112 | -0.69545084 |
| 4 | 770349  | ATP2A2            | 0.20622288 | -0.2342213  | 0.2449811 | -0.9294675 | -0.6961665  |
| 4 | 830523  | LOC386486         | 0.08565493 | -0.4474909  | 0.080475  | -1.074397  | -1.00970717 |
| 4 | 940730  | ATP2A2            | 0.36557433 | -0.1884212  | 0.3876212 | -0.6890965 | -0.32926766 |
| 4 | 1030471 | A930025D01RIK     | 0.19329938 | -0.2232873  | 0.2138064 | -0.9779376 | -0.89459324 |
| 4 | 1030630 | RCCD1             | 0.15933195 | 0.12449355  | 0.2035504 | -1.0137616 | -0.9984959  |
| 4 | 1070341 | 4933439C20RIK     | 0.42997253 | 0.19604406  | 0.1498891 | -1.8016914 | -1.973195   |
| 4 | 1090162 | 4833420G17RIK     | 0.16125073 | -0.3138399  | 0.0809485 | -1.3572246 | -1.3718821  |
| 4 | 1170022 | RMND1             | 0.29060188 | -0.1450856  | 0.1468585 | -1.0633713 | -1.056687   |
| 4 | 1230368 | CCDC84            | 0.61467767 | -0.083854   | 0.2177654 | -1.4082085 | -0.99959565 |
| 4 | 1240575 | BC021381          | 0.21330096 | -0.5488974  | 0.2142508 | -1.9443914 | -1.4022663  |
| 4 | 1260709 | OGT               | 0.10839459 | -0.3702143  | 0.2850997 | -1.4612406 | -1.580309   |
| 4 | 1450639 | AKAP8L            | 0.5648483  | -0.2964305  | 0.2188849 | -1.7587665 | -0.212761   |
| 4 | 1470519 | EG433224          | 0.304867   | -0.1385136  | 0.1677864 | -1.0571885 | -1.0067463  |
| 4 | 1690121 | USP52             | 0.43946272 | -0.1402438  | 0.2530504 | -0.8573989 | -0.79692686 |
| 4 | 1740139 | CCDC134           | 0.30110267 | -0.1780719  | 0.0470429 | -0.9429262 | -0.7047336  |
| 4 | 1740500 | PANK4             | 0.67385477 | -0.5060238  | 0.2808142 | -1.5802193 | -1.0912808  |
| 4 | 1850382 | XLR4C             | 0.28426185 | 0.04507157  | 0.3726558 | -1.0173037 | -0.6177896  |
| 4 | 2000692 | ABCA7             | 0.5396763  | -0.0964691  | 0.0468187 | -1.1396177 | -1.5498984  |
| 4 | 2030523 | 5033414D02RIK     | 0.20276864 | -0.1122839  | 0.1580103 | -0.9189044 | -0.12599514 |
| 4 | 2100563 | PRPF40B           | 0.25406185 | -0.0900538  | 0.304489  | -0.7708391 | -0.5932897  |
| 4 | 2190220 | CLK1              | 0.49675754 | -0.3382387  | 0.1239695 | -1.4421034 | -1.5152093  |
| 4 | 2230010 | GDI1              | 0.19106229 | -0.0332444  | 0.1390111 | -1.5269861 | -1.6944598  |
| 4 | 2230626 | WDR9              | 0.4391827  | -0.1613003  | 0.1748893 | -0.8018231 | -0.85576797 |
| 4 | 2340093 | DVL1              | 0.35762563 | -0.3889193  | 0.2433419 | -1.915898  | -1.939921   |
| 4 | 2340750 | ANKZF1            | 0.21348031 | -0.2237695  | 0.129371  | -0.9553186 | -1.1085457  |
| 4 | 2370093 | CLK2              | 0.17684044 | -0.3345491  | 0.1910823 | -1.126587  | -1.0418106  |
| 4 | 2370390 | KRTCAP3           | 0.09890349 | -0.246439   | 0.1965481 | -1.0176257 | -0.63591    |
| 4 | 2480170 | ABCA7             | 0.31657924 | -0.16193582 | 0.1769278 | -0.9886055 | -1.1941575  |
| 4 | 2490367 | 2410002F23RIK     | 0.08955514 | -0.0735459  | 0.3688986 | -0.0866699 | -0.8953552  |
| 4 | 2510068 | BTD12             | 0.16524182 | -0.4491321  | 0.1479003 | -1.1682944 | -0.8242158  |
| 4 | 2570343 | ZFP692            | 0.09309216 | -0.1174521  | 0.2059429 | -1.6185841 | -1.6572464  |
| 4 | 2600253 | A930025D01RIK     | 0.13197568 | -0.2711419  | 0.1560364 | -1.0466955 | -1.1523033  |
| 4 | 2710400 | DDX26B            | 0.46724138 | -0.148274   | 0.1031303 | -1.182154  | -1.2288185  |
| 4 | 2710767 | ARGLU1            | 0.12019938 | -0.5761066  | 0.289327  | -1.6093715 | -0.47408265 |
| 4 | 2750114 | NCAPD3            | 0.3790743  | -0.2618491  | 0.2534978 | -0.9486504 | -0.29880995 |
| 4 | 2810274 | ORF61             | 0.14630923 | -0.0189954  | 0.2804365 | -1.0351257 | -0.78935283 |
| 4 | 2810326 | FAM116B           | 0.24451445 | -0.2421226  | 0.4456023 | -2.1593766 | -1.8169833  |
| 4 | 2810725 | E4F1              | 0.3001272  | 0.18149318  | 0.3012346 | -0.7644843 | -0.26570585 |
| 4 | 2850064 | ANKRD23           | 0.2310462  | -0.3307141  | 0.1898981 | -1.0887249 | -1.1401409  |
| 4 | 2900739 | SKIV2L            | 0.2523401  | -0.017058   | 0.1396101 | -0.8984705 | -1.2744701  |
| 4 | 2940372 | SH2B1             | 0.19066957 | 0.04041898  | 0.1749732 | -0.8926296 | -1.2784199  |
| 4 | 2940564 | 9430015G10RIK     | 0.36967635 | -0.1994721  | 0.2537221 | -1.0441254 | -0.72663933 |
| 4 | 2940661 | WHRN              | 0.3991914  | -0.337542   | 0.7438012 | -0.7892256 | -0.06492108 |
| 4 | 2970646 | CLK2              | 0.22362897 | -0.3562391  | 0.2092706 | -1.0211323 | -0.9938925  |
| 4 | 3120037 | LOC100045877      | 0.09826824 | -0.1981873  | 0.0367219 | -0.9609824 | -1.2956779  |
| 4 | 3120681 | RAB24             | 0.21931334 | 0.16600391  | 0.099298  | -0.8679967 | -0.9190473  |
| 4 | 3140326 | MDN1              | 0.11319094 | -0.3757136  | 0.4578207 | -0.8873544 | -0.46652177 |
| 4 | 3180445 | OAS1B             | 0.4098541  | -0.1889286  | 0.0895656 | -0.7568442 | -0.87746024 |
| 4 | 3190092 | HNRPL             | 0.19127873 | -0.0751099  | 0.3803869 | -1.191188  | -0.74642175 |
| 4 | 3310315 | TCEA2             | 0.09494206 | -0.05404457 | 0.1536219 | -1.1249228 | -1.4217932  |
| 4 | 3310575 | ANKS3             | 0.28712677 | -0.3223082  | 0.0619779 | -1.2057086 | -1.0612948  |
| 4 | 3380279 | EXDL2             | 0.26011646 | -0.1695979  | 0.0420589 | -0.7603518 | -0.82310685 |
| 4 | 3360343 | PDE1B             | 0.48485157 | -0.3331116  | 0.2134225 | -1.914331  | -1.8909643  |
| 4 | 3370647 | RGL2              | 0.36938575 | -0.5979612  | 0.0743314 | -1.6529688 | -1.5741419  |
| 4 | 3370692 | USP52             | 0.1934326  | -0.4205985  | 0.0427724 | -1.3165617 | -1.0437351  |
| 4 | 3460279 | SFRS14            | 0.2510345  | -0.4779911  | 0.0642366 | -1.8099672 | -1.7543526  |
| 4 | 3610435 | 2700097O09RIK     | 0.18204632 | -0.1469585  | 0.1737003 | -0.8756512 | 0.11411448  |
| 4 | 3850142 | GTPBP2            | 0.35421285 | -0.1178343  | 0.1544    | -1.2131938 | -1.5380048  |
| 4 | 3870438 | GTPBP6            | 0.18151295 | -0.0608372  | 0.1302306 |            |             |

|   |         |               |            |             |           |            |             |
|---|---------|---------------|------------|-------------|-----------|------------|-------------|
| 4 | 4280167 | NXF1          | 0.24059163 | -0.2455351  | 0.3478729 | -1.073202  | -0.54999775 |
| 4 | 4280193 | IRF3          | 0.19078383 | -0.0191621  | 0.1036511 | -1.008185  | -1.0537564  |
| 4 | 4490014 | KLHL17        | 0.4122383  | -0.0720705  | 0.0286471 | -1.3768477 | -2.1437428  |
| 4 | 4540138 | LGALS4        | 0.33274734 | -0.0956443  | 0.0545661 | -1.8139999 | -1.9449354  |
| 4 | 4540682 | USP52         | 0.30599588 | -0.0880256  | 0.182329  | -0.7760599 | -0.5993868  |
| 4 | 4570739 | BRF1          | 0.41610464 | -0.316984   | 0.1199781 | -1.0253791 | -0.8618158  |
| 4 | 4640692 | SFI1          | 0.07698136 | -0.2574678  | 0.1761052 | -1.2982622 | -1.7539208  |
| 4 | 4670689 | 2410025L10RIK | 0.21664128 | -0.0421616  | 0.2395607 | -0.912401  | -1.0332341  |
| 4 | 4780445 | LUC7L         | 0.2412557  | -0.4061011  | 0.1633073 | -0.9245075 | 0.068673745 |
| 4 | 4850594 | HMAH1         | 0.3743372  | -0.0665586  | 0.4364435 | -0.8132285 | -0.94387275 |
| 4 | 4880091 | DOB2          | 0.3980279  | -0.1095174  | 0.1351056 | -0.6268593 | -1.2257727  |
| 4 | 4880630 | 2400010D15RIK | 0.33255446 | -0.1810196  | 0.069693  | -0.88024   | -1.1748484  |
| 4 | 4900474 | DOB2          | 0.42528292 | -0.0855697  | 0.3169548 | -0.9616585 | -1.2670698  |
| 4 | 5090543 | RGL2          | 0.46235004 | -0.5609056  | 0.1820015 | -1.7626181 | -1.8595898  |
| 4 | 5130066 | UBE1L         | 0.36882117 | -0.0558996  | 0.1853109 | -0.8643156 | -1.7969769  |
| 4 | 5130138 | APPL2         | 0.65082294 | -0.3349317  | 0.2025718 | -0.9883144 | -1.3984991  |
| 4 | 5220601 | SPNS1         | 0.32210362 | 0.3021401   | 0.1877899 | -0.8508745 | -0.73224986 |
| 4 | 5270110 | DIDO1         | 0.5056458  | -0.300972   | 0.1330745 | -1.0957726 | -0.5955566  |
| 4 | 5270563 | TCOF1         | 0.31422487 | -0.2889321  | 0.1853607 | -0.7193237 | -0.23814498 |
| 4 | 5310167 | ANKZF1        | 0.12443334 | -0.1972951  | 0.0404666 | -1.2217488 | -1.4097521  |
| 4 | 5310397 | DALRD3        | 0.1008103  | -0.069003   | 0.1270692 | -1.1454223 | -1.0453807  |
| 4 | 5310674 | TIA1          | 0.40371004 | -0.1898727  | 0.1953613 | -0.8008323 | -0.16116357 |
| 4 | 5340639 | ZFC3H1        | 0.26540148 | -0.5231384  | 0.118585  | -1.4837335 | -1.1517582  |
| 4 | 5360349 | TRIM11        | 0.46491557 | 0.11572367  | 0.136733  | -0.8257616 | -1.1439414  |
| 4 | 5360619 | GD1           | 0.4393506  | 0.06659373  | 0.2516301 | -1.4236783 | -1.655393   |
| 4 | 5390364 | APBB3         | 0.14441144 | -0.1531379  | 0.0640524 | -0.9543262 | -0.63757604 |
| 4 | 5390372 | AOC2          | 0.16631444 | -0.1527216  | 0.2101495 | -0.9411903 | -0.72875    |
| 4 | 5560400 | D4WSU114E     | 0.15572245 | -0.1014706  | 0.237465  | -0.973846  | -0.57338554 |
| 4 | 5570541 | 3300001P08RIK | 0.40700528 | -0.2868315  | 0.111822  | -1.011098  | 0.016560338 |
| 4 | 5700424 | CNCL1         | 0.40701666 | -0.178086   | 0.1431043 | -0.9771043 | -1.1599271  |
| 4 | 5810255 | AKAP9         | 0.26033667 | -0.4114471  | 0.0951021 | -0.9485708 | -0.7764445  |
| 4 | 5810280 | PRR14         | 0.33244637 | 0.10180815  | 0.0574024 | -0.6735334 | -1.040034   |
| 4 | 5820270 | SLCO4A1       | 0.18340228 | -0.1574401  | -0.00429  | -0.9308066 | 0.15765409  |
| 4 | 5860707 | METT11D1      | 0.17825536 | -0.4782057  | 0.1934019 | -1.0575179 | -0.05475572 |
| 4 | 5870021 | XLR4A         | 0.37506154 | -0.2680008  | 0.3359591 | -1.0595113 | -0.37813798 |
| 4 | 5890225 | RHD5          | 0.4731133  | -0.0469837  | 0.052208  | -0.9982612 | -0.9539481  |
| 4 | 6020554 | ZFP653        | 0.19007398 | -0.1344791  | 0.1052661 | -1.1172495 | -0.9640152  |
| 4 | 6060040 | PCKT1         | 0.34978262 | -0.1755647  | 0.2833322 | -1.1219649 | -0.9707999  |
| 4 | 6100630 | NDOR1         | 0.24982023 | -0.1263781  | 0.1633692 | -0.8552891 | -0.9623607  |
| 4 | 6270092 | RPS15A        | 0.6354717  | -0.1088195  | 0.0691099 | -1.193546  | -0.8190084  |
| 4 | 6330161 | SNAPC4        | 0.29368183 | -0.2554247  | 0.2796998 | -1.0673956 | -0.8672532  |
| 4 | 6350561 | BRWD1         | 0.48506826 | -0.2470886  | 0.0549105 | -0.7732623 | -0.8381169  |
| 4 | 6380121 | ZFYVE27       | 0.41172534 | -0.0492933  | 0.0526335 | -0.7377119 | -0.8592808  |
| 4 | 6450278 | LGALS4        | 0.37635604 | 0.06310671  | 0.1028545 | -1.2012337 | -1.317813   |
| 4 | 6550349 | BRWD1         | 0.40447485 | -0.2215614  | 0.1658045 | -0.8327835 | -0.93553156 |
| 4 | 6550408 | ING4          | 0.11413664 | -0.1777783  | 0.0695077 | -0.9037007 | -0.28819382 |
| 4 | 6580079 | UBP1          | 0.35480723 | -0.2261737  | 0.0867765 | -1.0854212 | -0.8527942  |
| 4 | 6620397 | LMBR1L        | 0.5116764  | -0.1361091  | 0.1931174 | -0.6943267 | -0.5484352  |
| 4 | 6760025 | KRBA1         | 0.4376474  | 0.00497683  | 0.1253297 | -1.2161673 | -0.9116583  |
| 4 | 6750475 | TMC6          | 0.3297129  | -0.2570631  | 0.0528868 | -0.7437328 | -1.1676871  |
| 4 | 150736  | CLK4          | 0.51014555 | -0.1636758  | 0.2505169 | -0.7993701 | -0.9137766  |
| 4 | 380187  | CXXC1         | 0.4862547  | -0.1234272  | 0.0311507 | -0.6571096 | -1.0717877  |
| 4 | 540609  | 1700019H03RIK | 0.6210329  | -0.1264334  | 0.2114936 | -0.7037664 | -1.4779814  |
| 4 | 780524  | STX1A         | 0.48562866 | 0.94108945  | 0.1484345 | -1.3671575 | -1.383183   |
| 4 | 830598  | CBX7          | 0.5412538  | 0.45981476  | 0.1203195 | -1.0302721 | -2.257623   |
| 4 | 940630  | CCDC137       | 0.39749518 | -0.2350397  | 0.2542709 | -0.7333434 | -0.47423798 |
| 4 | 1010168 | DNASE1L2      | 0.61027443 | -0.2161954  | 0.0888838 | -0.784247  | -0.68883353 |
| 4 | 1450075 | METAPL1       | 0.39139265 | 0.22713679  | 0.2194336 | -0.8745722 | -0.5944643  |
| 4 | 1470561 | MYCBP2        | 0.48400918 | -0.1876743  | 0.2668087 | -0.5308152 | -0.720508   |
| 4 | 1500056 | WBP7          | 0.47433537 | -0.0249173  | 0.1773334 | -0.771225  | -0.7792241  |
| 4 | 1820470 | KRBA1         | 0.44686866 | -0.12304487 | 0.0905059 | -0.8587886 | -0.6231247  |
| 4 | 1980609 | NDOR1         | 0.44010675 | -0.073721   | 0.3578109 | -0.7860322 | -0.81933326 |
| 4 | 2030397 | TMOD4         | 0.4710885  | 0.04396801  | 0.1115619 | -0.9452277 | -0.93429744 |
| 4 | 2490209 | GOLGA1        | 0.58803666 | 0.02084046  | 0.109756  | -0.7722108 | -0.8932049  |
| 4 | 2600079 | 261020705RIK  | 0.48939328 | -0.1607986  | 0.4265247 | -0.733669  | -1.064584   |
| 4 | 2690114 | ZC3H7A        | 0.49771014 | 0.00703464  | 0.3523646 | -0.8445697 | -1.0146798  |
| 4 | 2970092 | OVGP1         | 0.83092743 | -0.0039654  | 0.1488741 | -1.18174   | -1.1868912  |
| 4 | 3120544 | PARP6         | 0.77287084 | -0.3214862  | 0.3547405 | -0.7548787 | -0.9216371  |
| 4 | 3400632 | SIRT7         | 0.38539225 | 0.06127751  | 0.1444461 | -0.6276996 | -0.9532933  |
| 4 | 3940672 | DGKA          | 0.62026966 | -0.1228447  | 0.1575206 | -0.6643384 | -0.8900772  |
| 4 | 4010021 | AW549877      | 0.57180893 | 0.12673143  | 0.2044632 | -0.6840929 | -0.94665194 |
| 4 | 4150440 | FBXL12        | 0.54431826 | 0.49973148  | 0.1775443 | -1.0065787 | -1.8993006  |
| 4 | 4260647 | FBXL12        | 0.4330306  | 0.47958183  | 0.2021039 | -0.7230222 | -1.2980968  |
| 4 | 4730148 | MAN2C1        | 0.61254215 | 0.5258533   | 0.2632964 | -0.8992698 | -1.3443035  |
| 4 | 4880278 | TRIM39        | 0.76737034 | 0.11684041  | 0.1321404 | -1.0267897 | -1.3685368  |
| 4 | 4900343 | RHEBL1        | 0.6555798  | 0.01485679  | 0.1652009 | -0.8914403 | -0.6001502  |
| 4 | 5490646 | JMJD1A        | 0.56773925 | -0.0620472  | 0.1181623 | -0.6802958 | -0.65224236 |
| 4 | 5700343 | 3300001P08RIK | 0.5787612  | -0.2985997  | 0.1752739 | -1.013476  | 0.013549935 |
| 4 | 5860333 | FYCO1         | 0.67242384 | 0.346075    | 0.1280962 | -0.9589475 | -1.5537034  |
| 4 | 5910598 | DMTF1         | 0.5680408  | -0.133507   | 0.259303  | -0.7343473 | -0.44641134 |
| 4 | 6130121 | TBX6          | 0.947415   | -0.1992931  | 0.0620826 | -1.0775219 | -1.1206837  |
| 4 | 6130767 | IKBKE         | 0.84354585 | -0.2321354  | 0.5056509 | -0.8371061 | -0.98933005 |
| 4 | 6590646 | TMEM63B       | 0.5516942  | 0.14485945  | 0.2408211 | -0.7186381 | -0.80232364 |
| 4 | 6620553 | MAP4K2        | 0.9049679  | -0.2686061  | 0.4720172 | -0.980044  | -0.75888526 |
| 4 | 7100300 | TMC6          | 0.48420177 | -0.1864464  | 0.1685596 | -0.8550536 | -1.0195866  |
| 4 | 7550110 | LOC100047816  | 0.56438166 | -0.1817123  | 0.2046267 | -0.8151601 | -0.64684343 |
| 4 | 7550475 | ABCC5         | 0.7141916  | 0.07482292  | 0.2116994 | -0.9263908 | -0.77904284 |
| 4 | 50286   | DGKA          | 0.75745267 | -0.0050231  | 0.1100779 | -0.6805017 | -1.0557906  |
| 4 | 290389  | KIFC2         | 0.7225193  | 0.08422422  | 0.2235614 | -0.7795977 | -0.9726294  |
| 4 | 510669  | CYP4F13       | 0.51971334 | 0.49504146  | 0.2895333 | -0.7038621 | -1.2740248  |
| 4 | 1240484 | ARD3B         | 0.5264488  | 0.4093872   | -0.128484 | -0.5695981 | -1.1116763  |
| 4 | 2490646 | FRAP1         | 0.5089955  | -0.0641237  | 0.0567708 | -0.5231964 | -0.5480936  |
| 4 | 3290259 | CDC23         | 0.4449271  | -0.0330879  | 0.1093207 | -0.5716378 | -0.38587263 |
| 4 | 4760474 | PSG23         | 0.39244705 | 0.25598907  | 0.0542057 | -0.6224598 | -0.31182197 |
| 4 | 5080136 | SH3GL1        | 0.64764607 | 0.32702368  | 0.1710527 | -0.6319862 | -0.9717912  |
| 4 | 5490079 | TMC6          | 0.4613269  | -0.1804999  | 0.2084812 | -0.641943  | -0.0728887  |
| 4 | 5720424 | RFX1          | 0.51990765 | 0.11471245  | 0.1456245 | -0.6775925 | -0.5295124  |
| 4 | 6280326 | TNRC6A        | 0.5880353  | 0.10130817  | 0.2151383 | -0.6398164 | -0.69243985 |
| 4 | 6290598 | ZFP579        | 0.6109614  | 0.07550961  | 0.1805835 | -0.6415793 | -0.7678394  |
| 4 | 6370367 | JMJD6         | 0.5757648  | -0.146124   | 0.140514  | -0.6306441 | -0.38691735 |
| 4 | 6480056 | VAMP2         | 0.70446986 | 0.21701103  | 0.1485361 | -0.804507  | -0.9517567  |
| 4 | 6520600 | CLCF1         | 0.75760424 | -0.1064551  | 0.172886  | -0.3543769 | -1.1814574  |
| 4 | 6550370 | CLCF1         | 0.81128865 | -0.1516624  | 0.1713553 | -0.5073884 | -1.0967417  |
| 4 | 6860408 | ZFP187        | 0.5592779  | 0.5748101   | 0.1872281 | -0.512014  | -1.1491474  |
| 4 | 50079   | HIST1H1C      | 0.58955157 | 0.35783723  | -0.220361 | -0.4836575 | -1.1141647  |
| 4 | 1240368 | IL6RA         | 0.7536404  | -0.2703415  | -0.277956 | 0.02198264 | -1.6228257  |
| 4 | 2120619 | DOS           | 0.5797393  | -0.01804    | 0.3117134 | -0.4547517 | -0.63109607 |
| 4 | 2350504 | THRA          | 0.6036007  | 0.38245067  | -0.011147 | -0.4328695 | -1.1123849  |
| 4 | 2450678 | URM1          | 0.6621028  | 0.00614691  | 0.1130986 | -0.7947153 | -0.4913493  |
| 4 | 3450440 | ADR2          | 0.63561916 | 0.10316813  | -0.371518 | -0.1320852 | -1.3360114  |
| 4 | 160433  | 270005L05RIK  | 0.53268135 | -0.03550018 | 0.0848145 | -0.5231465 | -0.47728956 |
| 4 | 70691   | WFDCC2        | 0.69741786 | -0.3214808  | 0.1307825 | -0.0382406 | -0.53654546 |
| 5 | 1010050 | LMO4          | 0.91098957 | 0.2783301   | 0.095495  | -0.3491927 | -0.10776678 |
| 5 | 1890520 | EPN2AIP1      | 0.82528293 | 0.05209591  | 0.1747866 | -0.5943757 | -0.4638807  |
| 5 | 2100398 | PTPRK         | 0.93688685 | 1.0375055   | -0.262701 | -0.5936187 | 0.03754232  |
| 5 | 2340608 | CYP2D22       | 1.0701426  | 0.8048461   | -0.011446 | -0.4361563 | -0.8826068  |
| 5 | 2470242 | HSD3B7        | 0.7841078  | -0.1012377  | 0.6070964 | -0.6070605 | -0.17052975 |
| 5 | 2630719 | NPFF          | 0.68270844 | 0.11812698  | 0.2768392 | -0.3674097 | -0.47916725 |
| 5 | 4590497 | CSTF3         | 0.6710235  | -0.0742939  | 0.0853279 | -0.5189306 | -0.16488338 |
| 5 | 6060113 | SCML4         | 1.0037525  | -0.0621689  | -0.052935 | 0.1846942  | -0.7797142  |
| 5 | 6840382 | TSC22D3       | 1.3816634  |             |           |            |             |

|   |          |               |            |             |           |            |             |
|---|----------|---------------|------------|-------------|-----------|------------|-------------|
| 5 | 620240   | RARG          | 0.8174503  | -0.0247781  | 0.0203418 | -0.2476942 | -0.24551311 |
| 5 | 630309   | LRRC8         | 1.0652859  | -0.1570342  | 0.3783772 | -0.4464175 | -0.32878745 |
| 5 | 670386   | LRRC23        | 0.73271793 | 0.03416468  | 0.1386665 | -0.5160832 | -0.647465   |
| 5 | 870372   | METTL8        | 0.6806369  | 0.30808336  | -0.081186 | -0.3734601 | -0.25461924 |
| 5 | 870379   | RNF167        | 0.81273395 | -0.1737714  | -0.212298 | 0.05195592 | -0.91766316 |
| 5 | 1030754  | MTHFS         | 0.6647047  | 0.16346988  | 0.2080717 | -0.3631284 | -0.41324803 |
| 5 | 1050678  | ACTN2         | 3.0243533  | 1.998897    | -0.131787 | -0.1545687 | -0.25431222 |
| 5 | 1450367  | ANKRD12       | 0.5849315  | 0.20941165  | 0.1266536 | -0.5344091 | -0.28467458 |
| 5 | 1470632  | TRAF4         | 0.6138379  | 0.08968527  | 0.0358338 | -0.4042626 | -0.08694711 |
| 5 | 1690600  | AI64023       | 2.0337467  | 0.98206836  | -0.023715 | -0.0631801 | -0.9882382  |
| 5 | 1740615  | TMED1         | 0.65550676 | 0.10567255  | 0.1280174 | -0.3516573 | -0.33726394 |
| 5 | 2030546  | DAG1          | 1.09079792 | -0.0686989  | 0.2175458 | -0.5277401 | -0.4350865  |
| 5 | 2070594  | DNAJC6        | 1.0334866  | -0.40941995 | -0.33143  | -0.2776579 | -0.20860843 |
| 5 | 2100215  | IRS2          | 0.9693018  | 0.11601484  | -0.044201 | -0.4024893 | -0.23705846 |
| 5 | 21120187 | FAM113B       | 1.0287884  | -0.0227343  | 0.0391425 | -0.1892037 | -0.26583785 |
| 5 | 2260332  | TNRC6C        | 0.5422694  | 0.01797776  | 0.0417928 | -0.4864722 | -0.3918851  |
| 5 | 2320017  | ACRBP         | 0.57388836 | -0.0488319  | 0.1230151 | -0.5192942 | -0.45562828 |
| 5 | 2340682  | V1RD6         | 0.78305864 | 0.02509533  | 0.1501704 | -0.736438  | -0.55826753 |
| 5 | 2450717  | 4921505C17RIK | 0.8943998  | 0.05620503  | 0.2481781 | -0.3355289 | -0.4838997  |
| 5 | 2490242  | LOC100045950  | 0.8449063  | -0.0222418  | -0.285011 | 0.03707981 | -0.19280918 |
| 5 | 2490577  | CD1D1         | 0.75941837 | 0.27301905  | -0.052419 | -0.260659  | -0.22763266 |
| 5 | 2510390  | IDH2          | 0.56646127 | -0.016462   | -0.233502 | -0.4624634 | -0.16690657 |
| 5 | 2570725  | CDC2L1        | 0.6979662  | -0.1169349  | 0.3894029 | -0.4222122 | -0.43942472 |
| 5 | 2630255  | SLC6A19       | 1.7573209  | 0.9294929   | -0.30286  | -0.4356907 | -0.13232145 |
| 5 | 3060450  | OAS2          | 1.5169309  | -0.4026736  | 1.5151006 | -0.1086604 | -0.7094621  |
| 5 | 3060600  | RAB6B         | 1.1039687  | 0.7060807   | -0.081767 | -0.5080982 | -0.48312727 |
| 5 | 3060672  | JMJD1A        | 0.8624433  | -0.1688579  | 0.0963323 | -0.2284055 | -0.83267194 |
| 5 | 3290240  | GPR34         | 0.8203205  | 0.04472056  | 0.0287295 | -0.2023759 | -0.34914282 |
| 5 | 3310240  | EG665378      | 0.652679   | 0.4232695   | -0.164058 | -0.3792888 | -0.3268251  |
| 5 | 3400450  | PRICKLE3      | 0.67730653 | 0.18800746  | 0.2513281 | -0.3277335 | -0.6822874  |
| 5 | 3520689  | 9030612M13RIK | 0.52414536 | 0.00803588  | 0.1574853 | -0.490119  | -0.13106371 |
| 5 | 3610139  | DDR1          | 1.3156106  | 0.7191873   | 0.0624246 | -0.1233429 | -0.24292251 |
| 5 | 3780139  | UNC84A        | 0.64613545 | 0.0178838   | 0.138747  | -0.4433636 | -0.7332998  |
| 5 | 3800647  | ABCA3         | 1.1394408  | 0.0033012   | 0.1248797 | -1.1544248 | -0.29641744 |
| 5 | 3870487  | PLK3          | 0.55497825 | 0.02278981  | 0.1723372 | -0.4719821 | -0.07344373 |
| 5 | 3940201  | DND1          | 0.82891715 | -0.0592933  | 0.2595401 | -0.4031332 | -0.43688366 |
| 5 | 4010411  | LOC100047606  | 1.4390795  | -0.24047074 | 0.049294  | -0.2442312 | -0.25246173 |
| 5 | 4070278  | SLC12A6       | 0.67592377 | 0.02067352  | 0.1140183 | -0.3333088 | -0.4487934  |
| 5 | 4120750  | SLC15A2       | 1.00249    | 0.04358478  | 0.54646   | -0.4282067 | -0.25803736 |
| 5 | 4200162  | RBX1          | 0.601836   | 0.03785051  | 0.0806889 | -0.5297593 | -0.55792046 |
| 5 | 4210022  | BC038822      | 0.9275349  | 0.00420638  | 0.1177067 | -0.1209681 | -0.14771344 |
| 5 | 4490164  | E330018D03RIK | 0.5599729  | 0.10504995  | -0.061145 | -0.4655505 | -0.41954058 |
| 5 | 4590136  | ACTN1         | 0.83286524 | -0.0030647  | 0.043394  | -0.5647929 | -0.40785432 |
| 5 | 4810358  | TSC22D3       | 1.41796    | 0.15232182  | -0.139687 | -0.0515766 | -1.3561279  |
| 5 | 4830059  | LRRC23        | 0.6765782  | -0.0346121  | 0.0632594 | -0.3481093 | -0.4757975  |
| 5 | 4880537  | YPEL3         | 0.67648166 | 0.3011557   | 0.0699601 | -0.4439331 | -0.83264446 |
| 5 | 4920600  | C230071H18RIK | 0.8663763  | 0.13927257  | 0.0149924 | -0.4221129 | -0.1072362  |
| 5 | 5050437  | CCRK          | 0.68445367 | 0.25658828  | 0.0810325 | -0.8117009 | -0.43164977 |
| 5 | 5080301  | REV3L         | 0.79410946 | -0.1019185  | 0.2166924 | -0.3848589 | -0.76851565 |
| 5 | 5220132  | MBTPS1        | 0.6412978  | 0.02226223  | 0.1315541 | -0.4116429 | -0.42970145 |
| 5 | 5550035  | RRAD          | 0.5632931  | 0.13518552  | -0.445224 | -0.0310763 | -0.8175117  |
| 5 | 5690220  | MAP3K14       | 0.8294851  | 0.20222664  | 0.1315732 | -0.2029876 | -0.2780629  |
| 5 | 5690431  | LOC547323     | 1.3717598  | 0.6867768   | -0.363598 | 0.02307862 | -0.4180731  |
| 5 | 5690445  | CCRK          | 0.47979355 | 0.13356195  | 0.0371937 | -0.5711035 | -0.29138806 |
| 5 | 5890221  | FAS           | 0.4000922  | 0.21516882  | 0.029896  | -0.6234909 | -0.0794512  |
| 5 | 6110717  | USP28         | 1.7509075  | -0.4360943  | 0.8672102 | -0.0137667 | -0.5641107  |
| 5 | 6380112  | ALS2CL        | 1.2446936  | 0.2138931   | 0.0764959 | -0.6609878 | -0.768961   |
| 5 | 6400672  | KIF1B         | 1.0903708  | -0.2329678  | 0.1343602 | 0.21671174 | -0.83527255 |
| 5 | 6450619  | HSDL1         | 0.623109   | 0.18571115  | -0.072802 | -0.3915085 | -0.7480564  |
| 5 | 6510681  | KMJC1         | 0.71768713 | 0.38715208  | -0.369807 | -0.6348887 | 0.08342058  |
| 5 | 6660470  | JMJD1A        | 0.78242284 | -0.0797328  | 0.1472078 | -0.4952452 | -0.6817839  |
| 5 | 6760575  | ZFP809        | 0.8278123  | 0.13502237  | -0.002153 | -0.3797685 | -0.61010325 |
| 5 | 67806611 | SIFN1L1       | 0.87590785 | 0.02780715  | 0.1332098 | -0.3781493 | -0.16804318 |
| 5 | 6840494  | SLC23A3       | 0.60606547 | -0.0541499  | 0.2484934 | -0.4135452 | -0.852263   |
| 5 | 6880022  | DTX1          | 0.69003654 | 1.6251084   | -0.708189 | 0.05539841 | -1.3845552  |
| 5 | 6900600  | H2AFJ         | 0.79231113 | 0.14870998  | 0.0226068 | -0.4695052 | -0.30549935 |
| 5 | 6940537  | DNAJC6        | 0.927516   | 0.49157685  | -0.288748 | -0.1233947 | -0.14959642 |
| 5 | 6980544  | IHPK1         | 0.65250444 | 0.06358422  | 0.0585148 | -0.4557456 | -0.512311   |
| 5 | 7000356  | TCF25         | 0.7574177  | 0.11178095  | 0.0280122 | -0.7362196 | -0.50507903 |
| 5 | 7050600  | MAP3K3        | 0.8359932  | 0.30841896  | -0.108307 | -0.1674212 | -0.35335246 |
| 5 | 7100519  | CLKA          | 0.9141075  | -0.0434338  | 0.1706976 | -0.0964342 | -0.4834113  |
| 5 | 7160603  | SEPP1         | 1.0453744  | 0.1920568   | -0.181124 | -0.127236  | -0.06808604 |
| 5 | 7200086  | PLEKHG2       | 0.75091857 | -0.1890334  | 0.0413658 | -0.2789237 | -0.18883951 |
| 5 | 7200471  | DMTF1         | 0.74690264 | -0.0692013  | 0.3059415 | -0.3683142 | -0.7380561  |
| 5 | 7400400  | LOC100041103  | 0.9986436  | 0.07728579  | 0.0472019 | -0.2664951 | -0.77359927 |
| 5 | 7400735  | IQC81         | 0.5821788  | 0.16121018  | -0.018416 | -0.5371041 | 0.07041841  |
| 5 | 7510333  | GPR34         | 0.9260462  | 0.09842968  | 0.1116765 | -0.2293894 | -0.43705913 |
| 5 | 7510369  | LOC100047911  | 0.53411746 | -0.0831272  | 0.1720363 | -0.5256278 | -0.24471158 |
| 5 | 7550403  | SLC12A7       | 1.1823488  | 0.19702993  | 0.1115122 | -0.8509346 | -1.1370426  |
| 5 | 7560121  | LOC100041463  | 0.83397424 | 0.2044563   | 0.0184523 | -0.3634565 | -0.17242827 |
| 5 | 7610612  | RFX1          | 0.7701681  | -0.0086244  | 0.1906572 | -0.4367717 | -0.471424   |
| 5 | 160392   | CXCR4         | 1.0677584  | 0.04462484  | -0.113517 | 0.29712614 | -0.12449604 |
| 5 | 2470753  | AMIGO2        | 1.2412778  | 0.10564172  | -0.059005 | -0.1534326 | 0.054051496 |
| 5 | 2760382  | DAG1          | 0.7517487  | -0.142874   | 0.0501715 | -0.2577456 | -0.06584578 |
| 5 | 4180465  | ART4          | 0.39242193 | 0.8062627   | -0.777541 | -0.7087353 | 0.17237829  |
| 5 | 4880187  | ERD1          | 2.7329066  | -1.5728704  | 3.0135288 | -0.4721546 | -0.74884605 |
| 5 | 5390632  | TIME          | 1.1492953  | 0.13353469  | -0.138401 | -1.8810009 | -0.32810977 |
| 5 | 6550019  | SERTAD1       | 0.5700709  | 0.00990022  | -0.503666 | -0.0855315 | 0.009550156 |
| 5 | 150022   | NFKBIA        | 0.8551677  | -0.3533776  | 0.1228609 | -0.0939793 | -0.15228468 |
| 5 | 990221   | 2300002D11RIK | 2.0018516  | -0.1523686  | 0.3080829 | -0.0813868 | 0.000924526 |
| 5 | 1110035  | RAB31P        | 1.2711544  | 0.08871289  | -0.027479 | -0.3077178 | 0.12551449  |
| 5 | 1770541  | TNFRSF12A     | 0.74952143 | -0.0538582  | 0.0606397 | -0.4057791 | 0.033221323 |
| 5 | 1940646  | MATK          | 2.0113137  | 0.3207753   | -0.045488 | -1.1875263 | 0.4123556   |
| 5 | 2070291  | LEF1          | 0.89191073 | -0.197213   | -0.090606 | 0.01789068 | -0.00833405 |
| 5 | 2710286  | LEF1          | 1.0703988  | -0.3089136  | -0.125381 | -0.0181809 | -0.06958959 |
| 5 | 4540020  | DNAJB1        | 1.0427408  | -0.0289349  | -0.29365  | -0.0450509 | 0.034445737 |
| 5 | 6550593  | ARNTL         | 0.58692265 | -0.0920688  | 0.2058766 | -0.4515921 | 0.06770063  |
| 5 | 6580376  | ZFH3          | 0.9366513  | -0.1634955  | 0.0381298 | -0.0188224 | 0.024502488 |
| 5 | 510722   | TGFB3         | 1.1979189  | 0.23289709  | -0.278471 | -0.2409492 | 0.2899332   |
| 5 | 580682   | IFNGR2        | 1.046172   | -0.15623    | -0.080303 | 0.0781649  | 0.10787537  |
| 5 | 6370435  | GORASP1       | 0.6931623  | 0.04368828  | -0.128183 | -0.3319446 | 0.18591413  |
| 5 | 50037    | BBS4          | 0.7860567  | -0.4652004  | 0.4109646 | -0.0758306 | -0.10212678 |
| 6 | 3130246  | SNURF         | 0.1530917  | -1.6943094  | 0.243141  | 0.3299422  | -2.149858   |
| 6 | 630725   | TMEM66        | 0.48911485 | -0.3305185  | -0.548761 | 0.4470418  | -1.4086844  |
| 6 | 670711   | RBBP7         | 0.39677498 | -0.6107169  | -0.155808 | 0.45419478 | -0.1228529  |
| 6 | 1260554  | COX7A2L       | 0.39413315 | -0.3517286  | -0.611716 | 0.29664195 | -0.94626015 |
| 6 | 1570288  | DAPL1         | 0.26736262 | -2.712944   | 0.2061205 | -0.1296655 | -1.9228724  |
| 6 | 1570487  | TLR7          | -0.0986226 | -0.8246896  | 0.2136227 | 1.1194584  | -0.5885524  |
| 6 | 1580114  | BAI2          | 0.16912052 | -0.9971731  | 0.2132438 | 0.08540321 | -0.8293034  |
| 6 | 2350243  | DDX6          | 0.37916735 | -0.9239073  | 0.0221501 | 0.10685618 | -1.003881   |
| 6 | 3400747  | IGFBP4        | 1.0877856  | -2.9264435  | -0.180479 | 0.50320077 | -1.3957181  |
| 6 | 4830543  | IFIT2         | 0.21729783 | -1.0617174  | -0.031993 | 0.13804718 | -0.4128132  |
| 6 | 5080435  | IGFBP4        | 1.1312107  | -1.8229016  | -0.030567 | 0.7289869  | -0.9960932  |
| 6 | 5660474  | RSAD2         | -0.3415327 | -1.0871274  | 0.1065228 | 0.9964011  | -0.71681416 |
| 6 | 6520241  | CD247         | 0.8852251  | -0.6012352  | -0.309469 | 0.41617653 | -1.2219399  |
| 6 | 610601   | DDC           | 0.08542934 | -1.1252394  | -0.102627 | 0.25253654 | 0.10658433  |
| 6 | 4780446  | CCDC117       | 0.4194021  | -1.7642095  | 0.1028372 | -0.2190907 | -0.13199002 |
| 6 | 940102   | PSCD3         | 0.10942791 | -1.8229259  | -0.001041 | -0.2880521 | 0.121670775 |
| 6 | 4200605  | ATP1B1        | 0.6495356  | -2.584756   | 0.3825215 | -0.3166961 | 0.19480094  |
| 6 | 4760356  | CAT           | 0.01561703 | -1.0698916  | -0.164607 | 0.31107402 | 0.29844952  |
|   |          |               |            |             |           |            |             |

|   |         |               |            |            |            |            |             |
|---|---------|---------------|------------|------------|------------|------------|-------------|
| 7 | 7000114 | 1190020J12RJK | -0.3462033 | 0.13967265 | -0.035829  | 1.2397964  | -0.2665819  |
| 7 | 7050487 | CD63          | -0.1819311 | -0.0647265 | -0.125862  | 0.91613114 | 0.11934906  |
| 7 | 7200341 | FCNA          | -0.6874492 | 0.15927385 | -0.109283  | 1.4905627  | -0.43621403 |
| 7 | 7560114 | OSBPL3        | -0.4773614 | -0.1486169 | 0.1439854  | 1.4730624  | 0.20124619  |
| 7 | 150114  | CHI3L1        | -0.1795396 | -0.0397884 | 0.0183006  | 1.4883622  | 0.054136306 |
| 7 | 240474  | LTF           | -0.1367287 | -0.0512088 | 0.0788015  | 1.123851   | -0.05685555 |
| 7 | 290110  | PFKP          | -0.1785406 | -0.1585597 | -0.238813  | 0.96215457 | -0.1849942  |
| 7 | 290315  | RAB31         | -0.3809762 | 0.17991172 | -0.087976  | 0.72804004 | 0.04211511  |
| 7 | 450133  | TGFB1         | -0.5039915 | 0.23014206 | -0.103911  | 1.2769077  | -0.1543792  |
| 7 | 450739  | TYROBP        | -0.287133  | 0.361407   | -0.021431  | 1.1116204  | -0.11233914 |
| 7 | 580332  | C1QB          | -0.5871905 | 0.01662213 | -0.042978  | 1.1954226  | -0.27063477 |
| 7 | 620379  | KLRA7         | -0.518905  | -0.1617942 | 0.0846112  | 1.0759279  | -0.20566873 |
| 7 | 670452  | CD177         | -0.1109949 | -0.1427194 | -0.012607  | 0.9111147  | -0.06452789 |
| 7 | 730138  | RASSF4        | -0.3120447 | 0.3073829  | -0.224797  | 0.71436375 | 0.16843177  |
| 7 | 730487  | NGP           | -0.2652513 | -0.2702007 | 0.113757   | 3.3208282  | 0.1391414   |
| 7 | 830240  | LYZ2          | -0.398827  | 0.50081193 | -0.069377  | 3.0250614  | -0.16649812 |
| 7 | 840044  | HP            | -0.236252  | 0.24225877 | -0.029308  | 2.1952353  | -0.28050756 |
| 7 | 840349  | IFITM2        | -0.5792978 | 0.05876725 | -0.089446  | 1.4505012  | 0.83508956  |
| 7 | 940398  | KLRE1         | -0.6835511 | -0.2591836 | 0.4542099  | 2.979387   | -0.08665807 |
| 7 | 940504  | CD22          | -0.9209346 | 1.1918752  | -0.08286   | 1.8177465  | -0.17334932 |
| 7 | 1030142 | PYGL          | -0.3489762 | 0.21376763 | -0.046672  | 1.2328418  | -0.22968978 |
| 7 | 1030411 | EMR1          | -0.3491119 | -0.0128003 | -0.019769  | 0.7792685  | -0.03216767 |
| 7 | 1170564 | HP            | -0.0643338 | -0.100103  | -0.196304  | 1.2469848  | -0.10959411 |
| 7 | 1190546 | S100A8        | -1.2380153 | 0.01340475 | -0.095638  | 3.3240829  | -0.3726376  |
| 7 | 1230435 | SLC4A1        | -1.1401355 | -0.4989605 | 0.5140929  | 2.2392213  | 0.20833042  |
| 7 | 1230612 | AQP1          | -0.1712663 | -0.0356509 | -0.002173  | 1.6959586  | -0.14978014 |
| 7 | 1240646 | CCR5          | -0.5589539 | 0.5085506  | -0.071896  | 1.23864    | -0.30060365 |
| 7 | 1340634 | CEBPE         | -0.001318  | -0.0585413 | -0.047399  | 1.1689298  | -0.02880259 |
| 7 | 1470091 | SORT1         | -0.4460371 | -0.2231081 | -0.11758   | 1.1429197  | 0.7230461   |
| 7 | 1570551 | MMP9          | -0.2569481 | 0.04552055 | -0.06047   | 1.5302651  | -0.07303507 |
| 7 | 1580519 | ANXA3         | -0.1667999 | 0.09052088 | -0.077748  | 1.1060402  | -0.09766016 |
| 7 | 1770468 | ADSSL1        | -0.5124462 | 0.23942158 | -0.178898  | 0.9388658  | 0.12260695  |
| 7 | 1790068 | PRTN3         | -0.065045  | 0.02798636 | -0.014867  | 1.5029836  | 0.08485401  |
| 7 | 1940608 | LYZ5          | -0.5544975 | 0.475618   | -0.034239  | 2.1786222  | -0.1911271  |
| 7 | 1980603 | S100A9        | -1.5286818 | -0.2058173 | -0.103658  | 2.8087184  | -0.6064446  |
| 7 | 1980743 | OSBPL3        | -0.5914367 | -0.3269243 | 0.1345234  | 1.8305265  | -0.04357786 |
| 7 | 2320093 | SPIN2         | -0.7373128 | -0.2441865 | -0.091361  | 1.1510912  | 0.07286238  |
| 7 | 2570240 | CHI3L3        | -0.1837716 | 0.11013442 | 0.0140136  | 2.411226   | 0.03363754  |
| 7 | 2810468 | SORT1         | -0.3041441 | -0.0387027 | -0.035118  | 1.0012684  | 0.7651058   |
| 7 | 2850575 | VCAM1         | -0.9449562 | -0.2618096 | -0.159005  | 1.3468426  | 0.025443347 |
| 7 | 2970324 | HDC           | -0.5015109 | -0.0322166 | -0.138486  | 1.3387754  | 0.19987184  |
| 7 | 3130681 | EAR2          | -0.2094902 | 0.01560235 | -0.025153  | 0.88589364 | 0.006613956 |
| 7 | 3390484 | SCLY          | -0.4621109 | 0.14179048 | -0.090833  | 0.62246597 | 0.23495261  |
| 7 | 3420754 | IL1B          | -0.2699103 | 0.10711706 | -0.273534  | 0.7692631  | 0.060587026 |
| 7 | 3450059 | KLRA10        | -0.342207  | -0.3563047 | 0.0729246  | 1.7482568  | -0.08554404 |
| 7 | 3710170 | C1QC          | -0.5289037 | 0.10224597 | -0.137502  | 1.1830677  | -0.22340861 |
| 7 | 3710673 | KLRA16        | -0.2066168 | -0.0824471 | 0.0587621  | 1.1228503  | 0.044110946 |
| 7 | 3840292 | IFITM3        | -0.5231222 | -0.0412155 | 0.076998   | 2.0768723  | -0.05095995 |
| 7 | 3870242 | CHI3L3        | -0.5517907 | -0.1893099 | 0.0095589  | 2.500345   | -0.17776988 |
| 7 | 3940687 | MYO6          | -0.3678814 | -0.1903508 | 0.6344066  | 1.155236   | -0.48396894 |
| 7 | 4010446 | BLVRB         | -0.4630705 | 0.46818095 | -0.367575  | 0.8421004  | -0.04620076 |
| 7 | 4070762 | CDKN2C        | -0.2337972 | 0.00184619 | 0.0555128  | 1.1208802  | -0.3129162  |
| 7 | 4210139 | AQP1          | -0.1951098 | -0.0215562 | -0.043383  | 1.1624392  | 0.23618074  |
| 7 | 4230402 | LTBR4R1       | -0.276038  | 0.05668356 | -0.014781  | 1.239704   | 0.006345185 |
| 7 | 4290035 | TREM3         | -0.1702273 | 0.07561843 | -0.084869  | 1.4353752  | 0.29268172  |
| 7 | 4390113 | HP            | -0.1508467 | -0.029979  | 0.0612683  | 1.3636369  | -0.09242918 |
| 7 | 4540082 | SERPINA3F     | -0.8108837 | 0.3439971  | -0.022966  | 1.9302925  | -0.24933961 |
| 7 | 4610468 | CYB5R4        | -0.1967989 | 0.16793685 | -0.116463  | 0.80913204 | -0.07308664 |
| 7 | 4730220 | MRC1          | -0.2548443 | 0.00828954 | 0.0417641  | 0.7753296  | -0.02863146 |
| 7 | 4830138 | GAS7          | -0.5334426 | 0.01415653 | -0.086198  | 0.8697765  | -0.12762165 |
| 7 | 4890626 | LCN2          | -0.7391623 | -0.218912  | -0.118333  | 3.5254283  | -0.33841392 |
| 7 | 5090184 | ANXA3         | -0.1226181 | -0.0183901 | -0.042938  | 1.0850334  | -0.03244469 |
| 7 | 5130059 | IFITM6        | -0.2656761 | 0.017841   | 0.051359   | 1.759774   | -0.08698165 |
| 7 | 5220279 | MT1           | -0.6575177 | 0.24676375 | -0.126761  | 1.5397288  | -0.03455177 |
| 7 | 5270279 | ALOX5AP       | -0.5531371 | 0.45088995 | -0.114628  | 1.9023474  | 0.19540592  |
| 7 | 5490608 | CD22          | -0.4177773 | 0.3901783  | -0.158193  | 1.0074228  | -0.15978286 |
| 7 | 5720609 | LYZ           | -1.1050686 | 0.49819943 | -0.158349  | 2.6139     | -0.01946144 |
| 7 | 5820753 | SLC38A5       | -0.115926  | -0.0356415 | 0.0545147  | 1.2562256  | -0.02551514 |
| 7 | 5860347 | C3            | -0.3393385 | 0.09254649 | -0.019052  | 1.62108    | -0.04855823 |
| 7 | 6040601 | ELA2          | -0.0750229 | -7.94E-06  | -0.018869  | 1.160247   | 0.048439357 |
| 7 | 6370010 | CHI3L3        | -0.0420609 | -0.0613803 | -0.051666  | 1.0376841  | -0.07950581 |
| 7 | 6510487 | HEBP1         | -0.294412  | 0.15828876 | -0.023409  | 0.78874344 | -0.10688646 |
| 7 | 6580021 | MPO           | -0.2306158 | -0.0685233 | 0.0760643  | 2.1342444  | -0.09902813 |
| 7 | 6900440 | ERAF          | -0.8615739 | -0.3284571 | -0.00325   | 2.1974592  | -0.14187288 |
| 7 | 6940037 | LTF           | -0.9176502 | -0.5968004 | 0.573813   | 3.4771574  | 0.23466805  |
| 7 | 7000187 | TGM2          | -0.3297397 | -0.0329354 | -0.001288  | 0.9656653  | -0.02664762 |
| 7 | 7000224 | CD177         | -0.5174152 | -0.353656  | -0.117208  | 2.2479527  | -0.17896831 |
| 7 | 7040044 | TRF           | -0.0724893 | 0.1223834  | 0.0317639  | 1.0087618  | -0.09536416 |
| 7 | 7050538 | CCL9          | -0.1679216 | 0.19332723 | -0.028438  | 1.0632023  | 0.1029755   |
| 7 | 7160364 | FNDC3B        | -0.2155604 | -0.1624142 | 0.2773912  | 0.845595   | -0.10718816 |
| 7 | 7160711 | RETNLG        | -0.3477787 | 0.30266914 | -0.101823  | 2.4051073  | 0.035607435 |
| 7 | 7610114 | MGST1         | -0.1719475 | 0.05872526 | -0.164715  | 0.95770514 | 0.13324398  |
| 7 | 7650048 | FRP2          | -0.4639461 | 0.05474476 | 0.0902525  | 2.2425528  | 0.11658897  |
| 7 | 780438  | LGALS3BP      | -0.3324739 | 0.0280057  | 0.0933683  | 0.9907285  | -0.4886171  |
| 7 | 830632  | TSHZ3         | -0.0907667 | -0.2286186 | 0.5092101  | 0.90963316 | -0.3121102  |
| 7 | 830632  | FCGR4         | -0.6672739 | 0.00399934 | -0.161074  | 1.4956118  | 0.10654455  |
| 7 | 1410348 | F2RL1         | -0.2447086 | -0.0464897 | 0.232647   | 1.1096992  | -0.0356369  |
| 7 | 1780324 | CCR5          | -0.705636  | 0.6530227  | -0.130389  | 1.588515   | -0.6489743  |
| 8 | 7650242 | IL18R1        | -1.2998232 | 0.9557844  | -0.4906226 | -0.1487946 | -3.570936   |
| 8 | 240451  | ZFXH2         | -0.8681081 | -0.0062756 | 0.2831529  | 0.05245756 | -1.0357064  |
| 8 | 380102  | AHNAK         | -1.2370245 | 0.3025006  | -0.119441  | 0.2588598  | -1.2057147  |
| 8 | 430446  | IL18RAP       | -1.4282902 | 0.20061274 | 0.0700727  | -0.0027059 | -1.5483001  |
| 8 | 450615  | BBC3          | -1.0831835 | 0.4074011  | -0.081939  | 0.02974466 | -1.3889426  |
| 8 | 510020  | PDE2A         | -1.6692827 | -0.0575639 | 0.0389181  | 0.46923956 | -2.6365736  |
| 8 | 830521  | ZFP296        | -1.7430537 | 0.0855754  | -0.097059  | 0.40210608 | -1.6223383  |
| 8 | 1030152 | IFNGR1        | -1.1116544 | 0.0822158  | 0.0025841  | 0.18785697 | -2.1181624  |
| 8 | 1340193 | PHF11         | -2.117206  | 0.45081195 | -0.253399  | 0.6012085  | -2.4935677  |
| 8 | 1570133 | CTSW          | -1.1435405 | 0.19960079 | 0.1180296  | 0.11824072 | -1.2083821  |
| 8 | 1660504 | IL7R          | -0.4076632 | 0.7046573  | 0.0051273  | 0.14752693 | -3.2466295  |
| 8 | 2340288 | RNF138        | -0.795514  | 0.29552224 | -0.19797   | 0.42933336 | -1.0898359  |
| 8 | 2340301 | HSD11B1       | -0.558236  | 0.5000708  | -0.046634  | 0.36095068 | -1.7046098  |
| 8 | 2370520 | AHNAK         | -1.7893364 | 0.12860087 | 0.136086   | 0.18258865 | -2.2260437  |
| 8 | 2470086 | SLC39A4       | -1.0360161 | 0.48639482 | -0.156065  | 0.14139569 | -1.0502567  |
| 8 | 2570154 | NOD1          | -1.0833634 | 0.47265032 | 0.0238071  | 0.08668211 | -1.3929484  |
| 8 | 2600377 | EBI2          | -0.9526837 | 0.69404227 | -0.238426  | 0.01670894 | -2.1743455  |
| 8 | 2690014 | ZSCAN12       | -0.7061687 | 0.363101   | 0.0488739  | -0.0209931 | -0.5981091  |
| 8 | 2760274 | EPSTI1        | -1.2483171 | 0.1135494  | -0.287937  | 0.08422271 | -1.7207627  |
| 8 | 2940504 | NCF4          | -0.6605783 | 0.55357265 | -0.154364  | 0.23528482 | -1.4324349  |
| 8 | 3610619 | NTL5E         | -0.9970095 | 0.00977474 | 0.0865844  | 0.40398622 | -1.1677839  |
| 8 | 3710563 | ACYSB2        | -1.9818813 | 0.06960003 | -0.050469  | 0.18616313 | -1.1746442  |
| 8 | 3780390 | SCYL6         | -0.7579986 | 0.44578284 | -0.029511  | 0.07863466 | -1.1201009  |
| 8 | 3850692 | AMICA1        | -1.1230777 | 0.2385003  | -0.139417  | 0.8405063  | -2.4003522  |
| 8 | 3990474 | IL10RA        | -1.44859   | 0.2858614  | -0.095496  | 0.47054097 | -1.5992172  |
| 8 | 4150739 | CDCA2EP3      | -0.7615382 | 0.38462373 | 0.1041205  | 0.02572594 | -1.5650055  |
| 8 | 4220189 | APOB48R       | -1.4422323 | 0.19637422 | 0.028262   | 0.34801725 | -1.1425418  |
| 8 | 4830487 | GAB3          | -0.5659086 | 0.20774047 | -0.045932  | 0.4523278  | -1.6403457  |
| 8 | 4860719 | MYO1F         | -1.8353581 | 0.13817532 | -0.056577  | 0.31591627 | -2.9272084  |
| 8 | 5550671 | LY6C1         | -2.475055  | 0.12682974 | -0.11505   | 0.4784985  | -3.5152028  |
| 8 | 5560066 | STAT4         | -0.7644578 | 0.24379782 | -0.069365  | 0.3457686  | -1.202107   |
| 8 | 5810576 | CXCR3         | -4.6376305 | 1.1316578  | -0.089144  | 0.49762127 | -3.3137364  |
| 8 | 5820184 | CDH1          | -1.256679  | 0.6942598  | -0.413405  | 0.0411258  | -1.1817852  |
| 8 | 5870047 | PLEKHG3       | -0.9054085 | 0.0261693  | 0.0637276  | 0.1770026  | -0.9412191  |
| 8 | 5870692 | PLEKHG3       | -1.9987658 | 0.02318303 | 0.1335257  | 0.2728544  | -1.6823145  |
| 8 | 6040142 | POU6F1        |            |            |            |            |             |

|    |         |                   |            |            |           |             |             |
|----|---------|-------------------|------------|------------|-----------|-------------|-------------|
| 8  | 6980064 | GRAMD3            | -0.5704612 | -0.0210276 | -0.046912 | 0.72470474  | -1.8960617  |
| 8  | 7050112 | RNF138            | -0.6972936 | 0.4953279  | 0.1716631 | 0.01309761  | -0.79964733 |
| 8  | 160291  | BBS9              | -0.6350608 | 0.04553672 | 0.152845  | 0.4898401   | -1.0877718  |
| 8  | 1580528 | USP18             | -0.3835686 | -0.078936  | 0.0922077 | 0.68224925  | -1.6937002  |
| 8  | 2490452 | LOC100048346      | -0.3123585 | -0.1829248 | 0.0719189 | 0.9159425   | -1.8075445  |
| 8  | 4050524 | RNF138            | -0.7163357 | 0.25396883 | -0.20566  | 0.46636412  | -1.0189986  |
| 8  | 430332  | DSTN              | -0.751438  | 0.3227994  | -0.171675 | 0.5105777   | -1.0697868  |
| 8  | 1400168 | LOC100046608      | -0.1195448 | -0.2218111 | 0.0958963 | 0.9114525   | -1.6555644  |
| 8  | 3180521 | TDRD7             | -0.9813576 | -0.260986  | 0.5206843 | 0.75289416  | -1.1516742  |
| 8  | 3520020 | LOC100046608      | -0.1891596 | -0.3311587 | -0.053021 | 0.8494455   | -1.58559    |
| 8  | 4880747 | EPST11            | -0.5110741 | 0.6653337  | 0.068036  | 0.33315966  | -0.99126595 |
| 8  | 5570358 | BCL2              | -0.355602  | -0.2409018 | 0.4982612 | 0.7016852   | -0.96140594 |
| 8  | 7040333 | SQAT2             | -1.5219274 | 1.3824075  | 0.0587809 | 0.07285116  | -1.5521995  |
| 8  | 7050047 | FCGR4             | -0.2450512 | 0.26982903 | -0.343294 | 1.1935313   | -2.292588   |
| 8  | 7320329 | RECK              | -1.0035657 | 0.00628709 | 0.164528  | 0.6870806   | -1.0877208  |
| 8  | 7400328 | ACPL2             | -0.4263801 | 0.8523212  | -0.065077 | 0.64155555  | -1.4878875  |
| 8  | 7510020 | IFIT3             | -0.3561207 | -0.5988764 | 0.1579622 | 0.9376123   | -1.3572607  |
| 8  | 1990427 | CD7               | -0.3876257 | 0.18727806 | -0.148593 | 0.67544365  | -1.1488056  |
| 8  | 3800670 | ANK               | -0.5175393 | 0.7979525  | -0.217738 | 0.5461669   | -1.3131096  |
| 8  | 4050390 | OTTMUSG0000005737 | -0.8320254 | 0.12754907 | 0.051888  | 0.7611806   | -1.1709393  |
| 8  | 4610139 | USP18             | 0.00871308 | -0.4301906 | 0.1641003 | 1.0737284   | -1.3535166  |
| 8  | 5860243 | PLAC8             | -0.2655203 | 0.8327393  | -0.076408 | 1.245675    | -2.2656713  |
| 8  | 7100040 | STAT4             | -0.271383  | 0.09933791 | -0.097421 | 0.8770251   | -1.1824715  |
| 8  | 3990053 | F2R               | -0.9792303 | 0.71406555 | -0.037115 | 1.0121216   | -1.6209121  |
| 8  | 2260474 | DBERTD82E         | -0.4339025 | 0.21209756 | -0.126752 | 0.7526553   | -0.850753   |
| 8  | 2370364 | CD81              | -0.3348952 | -0.1060962 | 0.9030281 | 0.04937842  | 2.538164    |
| 9  | 2600019 | CLSPN             | -0.5852103 | -0.8290236 | 1.0859618 | 0.17197435  | 1.5614772   |
| 9  | 4570088 | CDC20             | -0.3732595 | -0.5459932 | 0.6716548 | 0.07323027  | 1.337247    |
| 9  | 6330114 | KIF15             | -0.8399719 | -0.7925321 | 1.4205556 | 0.11113067  | 1.960467    |
| 9  | 6330725 | TCF19             | -0.6387444 | -0.0283047 | 0.7488937 | 0.16858086  | 1.1265393   |
| 9  | 7150431 | LOC237877         | -0.4895431 | -0.4768923 | 0.8393204 | -0.0181991  | 1.5333719   |
| 9  | 130608  | LAG3              | -1.2935183 | -1.2518674 | 0.977634  | 0.24468951  | 4.193698    |
| 9  | 290132  | TNFRSF9           | -0.1225336 | -0.9245967 | 1.1652893 | 0.02679482  | 2.7943757   |
| 9  | 380520  | AURKA             | -0.5585745 | -0.5168086 | 0.5310111 | 0.00388442  | 1.5227621   |
| 9  | 430561  | BCAT1             | 0.00015611 | -0.3523037 | 1.8126001 | -0.0039614  | 3.2057753   |
| 9  | 620110  | TFR3              | -0.0019073 | -1.024319  | 0.6909407 | -0.2739445  | 1.3710964   |
| 9  | 630634  | INCENP            | -0.3239609 | -0.41205   | 0.7090595 | -0.07824992 | 1.3265277   |
| 9  | 650121  | MCM10             | -0.3911234 | -0.3331082 | 0.6503247 | 0.02286694  | 1.0595577   |
| 9  | 670133  | HMGN3             | -0.5682884 | -0.2269102 | 0.5663862 | 0.17423639  | 2.1238961   |
| 9  | 1030577 | SNN               | -0.4670968 | 0.74998367 | 0.0628077 | -0.3880003  | 1.9378284   |
| 9  | 1050400 | ESPL1             | -0.6192246 | -0.5538389 | 1.0969312 | 0.03706059  | 1.5426407   |
| 9  | 1190047 | HIST1H3E          | -1.1546432 | 0.17343163 | 1.6994715 | -0.2119655  | 1.807487    |
| 9  | 1260022 | CHTF18            | -0.0575247 | -0.1158079 | 0.9633614 | -0.0086395  | 1.4223394   |
| 9  | 1260605 | HIST1H2BN         | -0.5367541 | 0.13667409 | 0.902873  | -0.1950991  | 1.0040975   |
| 9  | 1300373 | TNFRSF9           | -0.2725343 | -1.2751533 | 1.0683141 | -0.0935522  | 2.6638591   |
| 9  | 1410070 | KNTC1             | -0.7796684 | -0.6401292 | 0.6967137 | 0.0245262   | 1.3267441   |
| 9  | 1500148 | GTSE1             | -0.6721363 | -0.4032179 | 0.8391426 | -0.1201531  | 1.2986226   |
| 9  | 1580626 | SGOL1             | -0.5323208 | -0.478423  | 0.5987933 | 0.02960397  | 1.2885709   |
| 9  | 1710242 | ECM1              | 0.04953754 | -0.9512837 | 0.1118773 | -0.2087196  | 0.91783637  |
| 9  | 1710368 | 3000004C01RIK     | -0.6114221 | -0.5203227 | 0.6299859 | 0.03846245  | 1.3105897   |
| 9  | 1740487 | HIST1H3A          | -1.0076512 | 0.16553046 | 1.5944427 | -0.2517212  | 1.6327704   |
| 9  | 1780524 | TFR3              | -0.0169164 | -1.1599969 | 0.7968738 | -0.3457989  | 1.3783798   |
| 9  | 1780543 | KIF2C             | -1.2980975 | -0.9926971 | 1.1675448 | -0.0345238  | 2.2751327   |
| 9  | 1820274 | CDC2A             | -0.949976  | -0.804891  | 1.0868939 | 0.13428079  | 1.676918    |
| 9  | 1940020 | FANCD2            | -0.3367442 | -0.4245866 | 0.9359296 | -0.0013705  | 1.5231521   |
| 9  | 1980446 | 2410015N17RIK     | -0.5833063 | -0.3061238 | 0.5415108 | -0.2578825  | 1.3911556   |
| 9  | 2030026 | CDC6              | -0.6387879 | -0.6015564 | 0.970435  | 0.08823093  | 1.3675996   |
| 9  | 2030068 | CHAF1A            | -1.1191069 | -0.8094093 | 1.0198354 | 0.07857486  | 1.9702903   |
| 9  | 2060544 | CHST2             | -0.3425783 | -0.292782  | 0.9394068 | 0.01997452  | 2.688783    |
| 9  | 2190064 | SPAG5             | -1.0194156 | -0.8444105 | 1.5323291 | -0.0068008  | 1.5939565   |
| 9  | 2230619 | HIST1H2BM         | -0.5035781 | 0.08792359 | 0.8092253 | -0.5775214  | 0.908444    |
| 9  | 2340056 | CLDN10            | -0.3425432 | -0.9027998 | 0.7900825 | 0.6162398   | 2.6416068   |
| 9  | 2340131 | KIF2B3            | -0.0577611 | -0.2092742 | 1.3628126 | -0.0028302  | 1.3112456   |
| 9  | 2360121 | NHEK2C            | -0.1293509 | -0.091669  | 1.3515508 | -0.0846097  | 2.214335    |
| 9  | 2570398 | APITD1            | -0.3278037 | -0.3638123 | 0.7187753 | 0.07595997  | 1.9523815   |
| 9  | 2650521 | CCDC99            | -0.151226  | -0.3935691 | 0.9529505 | 0.11087116  | 1.688338    |
| 9  | 3060767 | LIG1              | -0.868197  | -0.7500369 | 0.8977131 | -0.0499475  | 1.7022771   |
| 9  | 3120392 | STMN1             | -0.6317185 | -0.5831705 | 0.7664508 | -0.1186408  | 1.6941395   |
| 9  | 3140731 | ZRANB3            | -0.0582722 | -0.1181047 | 0.9434628 | -0.1683014  | 1.4603107   |
| 9  | 3400754 | CDC45L            | -0.7019122 | -0.5837786 | 0.9364289 | 0.00275357  | 1.879271    |
| 9  | 3840446 | MARCKSL1          | -0.2538045 | -0.3779081 | 1.1089073 | 0.23672992  | 2.8536797   |
| 9  | 3890528 | RGS16             | -0.0655206 | -0.2348166 | 1.0062193 | -0.0142541  | 3.3244667   |
| 9  | 3930156 | PTPLA             | 0.10203128 | -1.0203831 | 0.544171  | -0.5167866  | 1.8976005   |
| 9  | 4050437 | CHST3             | -1.028754  | 0.5750173  | -0.022836 | -0.3602807  | 1.4392912   |
| 9  | 4120452 | CENPM             | -0.6953176 | -0.4071097 | 0.4382917 | -0.0098972  | 1.3672067   |
| 9  | 4250121 | HMGN3             | -0.4590402 | -0.1399858 | 0.6113073 | 0.15173712  | 1.816884    |
| 9  | 4390228 | CDC20             | -0.7719579 | -0.6031199 | 0.8467649 | 0.06122774  | 1.4331465   |
| 9  | 4390639 | PTPRS             | 0.0575087  | -0.3387082 | 1.4525787 | -0.2964127  | 2.083189    |
| 9  | 4480070 | NCAPD2            | -0.5746698 | -0.73693   | 0.763842  | 0.03889231  | 1.3032583   |
| 9  | 4570189 | NRGN              | -0.4547499 | -0.3800307 | 2.3192456 | 0.23023006  | 3.4258573   |
| 9  | 4570440 | CENPM             | -0.464937  | -0.3248576 | 0.6713181 | 0.16893575  | 1.562618    |
| 9  | 4860209 | HIST1H3C          | -0.2561637 | -0.2130275 | 1.4648103 | 0.04216893  | 1.8873585   |
| 9  | 4880553 | SOX5              | -0.0124591 | -1.0809534 | 0.4191218 | -0.2651737  | 1.505002    |
| 9  | 4890382 | HIST1H3D          | -1.1356908 | 0.17718549 | 1.731253  | -0.2244249  | 1.7923189   |
| 9  | 4920487 | CKB               | -0.6814721 | -0.025506  | 0.0333362 | 0.43914747  | 1.4013859   |
| 9  | 5050471 | NRN1              | -0.3039367 | -0.046666  | 1.9753327 | -0.057897   | 4.8227763   |
| 9  | 5420451 | HIST1H2BH         | -0.609654  | 0.20843351 | 1.1823401 | -0.310973   | 1.1571044   |
| 9  | 5720626 | RCC1              | -0.3640301 | -0.4187147 | 0.6710252 | -0.0303655  | 1.3117501   |
| 9  | 5910528 | BUB1B             | -0.6903874 | -0.6359716 | 0.8057371 | 0.06195759  | 1.5200329   |
| 9  | 6040634 | HIST1H2BJ         | -0.7530632 | 0.16136505 | 1.3222367 | -0.3812829  | 1.3345364   |
| 9  | 6100113 | HIST1H2AB         | -0.2104462 | -0.1372    | 1.2430927 | 0.04542914  | 1.5260333   |
| 9  | 6110170 | TPH1              | -0.8364089 | -0.283465  | 0.5165882 | 0.08102498  | 1.1977225   |
| 9  | 6220270 | MCM5              | -0.4668911 | -0.7817145 | 0.9009676 | 0.03347137  | 1.7091849   |
| 9  | 6220692 | PTPRS             | 0.00294026 | -0.1313766 | 1.1892868 | -0.2909011  | 1.444452    |
| 9  | 6450072 | NMRAL1            | -0.7949411 | -0.3548082 | 0.4920779 | 0.06816848  | 1.6077566   |
| 9  | 6480739 | RAD51             | -0.5432778 | -0.4277962 | 0.5992427 | 0.00155036  | 0.9039202   |
| 9  | 6510500 | CDC47             | -1.158222  | -1.4348507 | 1.2621017 | 0.0287212   | 2.5545373   |
| 9  | 6620184 | SPC25             | -0.5106553 | -0.4176675 | 0.4907682 | 0.06815397  | 1.2490512   |
| 9  | 6620187 | NDRG1             | -0.20773   | -1.3636293 | 0.5001772 | -0.0034087  | 1.781365    |
| 9  | 6660500 | KIF4              | -0.755963  | -0.7107785 | 0.6979001 | 0.07815366  | 1.500641    |
| 9  | 6840685 | RILPL2            | -0.5992769 | -0.498834  | 0.4196205 | 0.07075403  | 1.8303981   |
| 9  | 6940411 | PIF1              | -0.5688895 | -0.2976013 | 1.064339  | 0.03950789  | 1.0059048   |
| 9  | 7040475 | CENPM             | -0.5636495 | -0.4622669 | 0.557921  | 0.08283655  | 1.2189958   |
| 9  | 7200519 | CENPA             | 0.00202942 | -0.4858617 | 1.0855374 | -0.0673817  | 1.3620943   |
| 9  | 7560373 | RAD54L            | -0.8422056 | -0.6396153 | 1.3682638 | 0.12804893  | 2.3294125   |
| 9  | 7610152 | HIST1H3H          | -0.2147034 | 0.05256721 | 1.0159496 | -0.1394012  | 1.491447    |
| 9  | 7650195 | 2610510J17RIK     | -0.4405084 | -0.3099116 | 0.7204342 | 0.06801587  | 1.3130301   |
| 9  | 130754  | HIST1H2BK         | -0.5623823 | 0.22687514 | 1.7395928 | -0.2105462  | 1.89056     |
| 9  | 150148  | HIST1H2BF         | -0.6588048 | 0.1770213  | 1.1606034 | -0.3886055  | 1.1746311   |
| 9  | 610039  | E130016E03RIK     | -0.5395269 | -0.5282331 | 2.0287364 | 0.05379494  | 2.123137    |
| 9  | 110259  | CDC7              | -0.027526  | -0.4282315 | 0.7127674 | -1.0541297  | 0.40485877  |
| 9  | 7650435 | VKORC1            | -0.0298742 | 1.2075281  | -0.338464 | 0.20225775  | -0.6413111  |
| 10 | 380368  | ZC3H6             | -0.0544277 | 0.95019884 | -0.035445 | 0.0669838   | -0.8121603  |
| 10 | 6860577 | SORL1             | -0.714142  | 1.2556125  | -0.156267 | 0.38349462  | -1.2781966  |
| 10 | 7507630 | CXCR6             | -0.3752102 | 0.98733073 | -0.158996 | 0.07371905  | -0.7265596  |
| 10 | 240445  | DMRTA1            | -0.6352922 | 1.0616304  | -0.065232 | 0.3821554   | -0.63202685 |
| 10 | 1510497 | HGST              | -0.2184995 | 0.85472965 | -0.126003 | 0.39274812  | -1.2343808  |
| 10 | 1690187 | LY6A              | -0.877124  | 2.0240533  | -0.216378 | 0.9832025   | -1.9629965  |
| 10 | 2070196 | EG218444          | -0.4390438 | 1.0547813  | -0.037532 | 0.46125126  | -0.60517895 |
| 10 | 2480450 | BCLP2             | -0.3738845 | 0.6678264  | 0.0303789 | 0.05241394  | -0.79138654 |
| 10 | 2850092 | IFNG              | -0.9920387 | 1.0114313  | 0.0344186 | -0.0008872  | -0.6986869  |
| 10 | 3140041 | 2310046K01RIK     | -0.5143738 | 0.87547606 | -0.119344 | 0.38111454  | -0.906136   |
| 10 | 3180730 | ABHD14B           | 0.16180259 | 1.445508   |           |             |             |

|    |         |               |              |            |            |            |             |
|----|---------|---------------|--------------|------------|------------|------------|-------------|
| 10 | 6480201 | MOCOS         | -0.2111002   | 0.89232504 | -0.040485  | 0.3540286  | -0.36018276 |
| 10 | 6520075 | IER3          | -0.0810658   | 1.3497391  | 0.1729744  | -0.3171764 | -1.2738388  |
| 10 | 6650170 | PRF1          | -0.18064     | 1.0731124  | -0.042522  | 1.0122825  | -0.66869164 |
| 10 | 6940068 | X99384        | -0.7164375   | 1.3614513  | -0.12154   | 0.51424086 | -0.55599016 |
| 10 | 1050711 | CDK5RAP1      | 0.08876862   | 1.2402722  | -0.36876   | -0.1091678 | -0.3336512  |
| 10 | 1510669 | ACY1          | -0.2312906   | 0.82656693 | 0.2842086  | -0.0330854 | -0.08181964 |
| 10 | 1850725 | SDCBP2        | 0.08801642   | 1.8291116  | -0.060793  | -0.0293171 | -0.32626045 |
| 10 | 1940221 | DKKL1         | -0.1147339   | 1.1056691  | -0.0581    | 0.07213236 | -0.2249223  |
| 10 | 2450259 | 9130422G05RIK | -0.5418192   | 0.646387   | 0.1496138  | 0.1852825  | -0.18990251 |
| 10 | 2490612 | C85492        | 0.1837858    | 1.2503039  | -0.081554  | -0.1400839 | -0.16826522 |
| 10 | 6330195 | AMK2N1        | -0.174093    | 0.9759465  | -0.119899  | 0.2533234  | -0.3365877  |
| 10 | 790678  | SDCBP2        | 0.04716019   | 2.67759    | -0.048961  | 0.03404709 | -0.33409688 |
| 10 | 940010  | SDCBP2        | -0.0775694   | 1.0443549  | -0.063081  | 0.023185   | -0.19590601 |
| 10 | 1430497 | C85492        | 0.30632842   | 1.4584951  | -0.030927  | -0.1007836 | -0.13094567 |
| 10 | 1690255 | SUSD3         | -0.1306676   | 1.0514752  | -0.111412  | 0.24162894 | -0.22639081 |
| 10 | 1820706 | SCNZB         | -0.012077    | 1.1733516  | -0.009515  | -0.054861  | -0.14166595 |
| 10 | 3360753 | CDK5RAP1      | 0.29377717   | 1.7013819  | -0.064936  | -0.0485389 | -0.10830775 |
| 10 | 2190475 | MS4A6D        | -0.3052654   | 0.85346884 | -0.132573  | 1.0013032  | -0.92643315 |
| 11 | 50253   | GZMM          | -2.326643    | 1.7475541  | -0.216131  | 2.0412817  | -2.4139516  |
| 11 | 6550376 | LY6E          | -0.6110438   | 0.59248203 | -0.123847  | 0.7145477  | -0.50643164 |
| 11 | 130598  | OAS1G         | -0.5353351   | -0.0291086 | -0.04548   | 1.1628896  | -0.9095337  |
| 11 | 1820075 | PLEK          | -1.6386354   | 0.43616602 | -0.059084  | 1.3064214  | -1.23723    |
| 11 | 2810040 | D14ERTD668E   | -0.5827893   | -0.074462  | 0.0186495  | 0.54072607 | -0.35882404 |
| 11 | 2810487 | SLPI          | -1.1043729   | 0.30720282 | -0.563594  | 1.0061632  | -1.1280528  |
| 11 | 3180025 | MS4A6D        | -0.7521795   | 0.8457629  | -0.164153  | 1.0100653  | -1.0860966  |
| 11 | 3840521 | LOC100046232  | -0.5817232   | 0.32705802 | -0.13438   | 0.7628773  | -0.7606646  |
| 11 | 3890328 | OAS1G         | -1.1161572   | -0.0271437 | 0.0628541  | 1.1055411  | -0.7551746  |
| 11 | 4040035 | NGK7          | -0.3813671   | 0.30441138 | -0.032264  | 0.69550866 | -0.69508433 |
| 11 | 4290014 | KLRK1         | -0.6036368   | 0.4028507  | -0.108803  | 0.5822956  | -0.52923113 |
| 11 | 4810328 | NRARP         | -1.4170791   | 0.38383174 | -0.168006  | 1.6258821  | -1.3388091  |
| 11 | 4850672 | 4930434E21RIK | -0.8408336   | 0.70573354 | -0.073259  | 0.60557353 | -0.6591107  |
| 11 | 5690192 | A630077B13RIK | -0.5135777   | 0.4979071  | -0.22829   | 0.4929957  | -0.61666244 |
| 11 | 5810452 | AQP9          | -2.7816396   | 1.6749226  | -0.24184   | 1.8078489  | -2.505471   |
| 11 | 6130543 | NAP2          | -0.6825757   | 0.28451627 | -0.137601  | 0.62449193 | -0.64727616 |
| 11 | 6580646 | KLRK1         | -1.109293    | 1.0660231  | -0.072787  | 0.98471177 | -0.84940785 |
| 11 | 7650615 | EOMES         | -1.3359905   | 0.08482761 | 0.1204967  | 1.2148632  | -0.8510953  |
| 11 | 450735  | GVN1          | -1.0018518   | -0.050251  | 0.70933564 | 0.8539892  | -0.6715495  |
| 11 | 540288  | PTPN12        | -0.6400365   | 0.22480291 | 0.1260474  | 0.44603703 | 0.5452726   |
| 11 | 1110458 | SMAD3         | -0.8000685   | -0.0737445 | 0.2729368  | 0.98844373 | -0.5365082  |
| 11 | 1580008 | AIM1          | -1.4758222   | 0.5364586  | -0.042779  | 1.2466923  | -0.9190911  |
| 11 | 1690091 | VIM           | -0.9734549   | -0.1068682 | 0.2104798  | 1.001911   | -0.58627075 |
| 11 | 1940255 | PLCG2         | -0.8706399   | 0.8407024  | -0.150422  | 0.7739858  | -0.5925376  |
| 11 | 2030767 | KLRK1         | -0.4886469   | 0.46324936 | -0.055174  | 0.7127015  | -0.32301414 |
| 11 | 4260300 | ARFL4         | -0.5087921   | 0.18964505 | 0.0055753  | 0.59913146 | -0.31331927 |
| 11 | 5340292 | NUDT4         | -0.5743086   | -0.0168319 | -0.071549  | 0.7063502  | -0.3795428  |
| 11 | 6550647 | LRRK1         | -2.5167398   | 0.8089982  | -0.213728  | 1.4712458  | -2.2016802  |
| 11 | 6660653 | BAG3          | -0.4163595   | 0.50381684 | -0.032702  | 0.67255735 | -0.31014642 |
| 11 | 650386  | ITGAD         | -0.5840267   | -0.0589136 | 0.2734782  | 0.58883035 | -0.23284881 |
| 11 | 2120397 | CCR5          | -1.2974348   | 1.5768918  | -0.051282  | 2.4675891  | -0.8468936  |
| 11 | 2850112 | 1700025G04RIK | -2.107915    | 0.16934785 | -0.00758   | 1.3413111  | -1.5325258  |
| 11 | 2850398 | ASB2          | -0.6824218   | 0.39101648 | -0.022473  | 0.6136681  | -0.36069548 |
| 11 | 4290709 | IFI3          | -0.5969726   | 0.37198547 | -0.096792  | 0.7413066  | -0.17035815 |
| 11 | 4810575 | HK3           | -0.4231804   | 0.30021414 | -0.083224  | 0.5864427  | -0.15964682 |
| 11 | 6620521 | CNKK6         | -1.0569944   | 0.8008776  | -0.046792  | 0.51401764 | -0.7974044  |
| 11 | 510041  | EPB4.1L3      | -0.5680583   | 0.13184571 | -0.059305  | 0.53780466 | -0.25124446 |
| 11 | 630025  | MLKL          | -0.601047    | 0.33921322 | -0.041329  | 0.7001887  | -0.181516   |
| 11 | 940138  | ST6GALNAC4    | -0.589672    | 0.02231347 | -0.182394  | 0.50169146 | -0.32756022 |
| 11 | 1010435 | GSTO1         | -1.2369081   | 0.18564805 | -0.372713  | 0.7887907  | -0.87779343 |
| 11 | 2450053 | SMAD3         | -1.285328    | 0.17789239 | -0.001869  | 0.56275964 | -0.9284641  |
| 11 | 3060332 | TM6SF1        | -0.7406098   | -0.0312994 | 0.0860055  | 0.40744737 | -0.4232805  |
| 11 | 3180019 | GN2           | -1.0270603   | 0.92836595 | -0.133019  | 0.4312319  | -1.0624764  |
| 11 | 3480026 | LOC100047167  | -1.5804853   | 0.24208055 | -0.099968  | 0.6846996  | -0.9630498  |
| 11 | 3890750 | ZCCHC18       | -1.828179    | -0.0541106 | 0.2639497  | 1.0439396  | -0.8957572  |
| 11 | 5050463 | HMOX1         | -0.5838834   | 0.16757768 | -0.123314  | 0.5916535  | -0.1759763  |
| 11 | 6180427 | DAPK2         | -2.5453503   | 1.1157223  | -0.141181  | 1.3301003  | -1.5287243  |
| 11 | 6380672 | RYK           | -0.599421    | 0.22556624 | -0.116713  | 0.46837962 | -0.29768315 |
| 11 | 6840594 | RGS1          | -0.9526999   | 0.11018237 | -0.092884  | 0.70671386 | -0.3483704  |
| 11 | 110064  | SLA           | -0.6733007   | 0.12922116 | -0.130013  | 0.4339575  | -0.31589642 |
| 11 | 130735  | ARSB          | -1.2568856   | 0.35316268 | -0.478666  | 1.4938745  | -0.21586123 |
| 11 | 2140221 | SLC40A1       | -1.5670632   | -0.037353  | -0.238684  | 1.3891402  | -0.58502555 |
| 11 | 2340241 | ST6GALNAC4    | -0.7501282   | 0.00409247 | -0.097788  | 0.65669185 | -0.12856314 |
| 11 | 3400279 | COBLL1        | -0.9467288   | 0.0709075  | -0.039765  | 0.4599457  | -0.48447117 |
| 11 | 3450167 | SNX10         | -1.2486122   | 0.7545133  | -0.012982  | 0.9514448  | -0.35557535 |
| 11 | 4200747 | SLAMF7        | -1.2269337   | 0.38966128 | -0.164123  | 0.79448175 | -0.539909   |
| 11 | 4730050 | KCNJ8         | -0.7373281   | 0.5877779  | -0.070664  | 0.27248114 | -0.49157405 |
| 11 | 5340138 | FGF13         | -1.3989375   | 0.76164436 | -0.182169  | 0.6725847  | -0.7789146  |
| 11 | 5900070 | GATA3         | -1.0155456   | 0.31155956 | -0.073303  | 0.37610403 | -0.53320473 |
| 11 | 6520392 | CSPRS         | -0.7892281   | 0.19993694 | -0.188846  | 0.45905507 | -0.38066077 |
| 11 | 6940451 | MYADM         | -0.5187165   | 0.20588082 | -0.086647  | 0.49134025 | -0.13326536 |
| 11 | 7570209 | STARD10       | -0.8840743   | 0.39250875 | -0.335742  | 0.9514005  | -0.12319579 |
| 11 | 2260162 | MFSID10       | -1.1835266   | 0.00432218 | 0.1443587  | 0.26191252 | -0.58998    |
| 11 | 2750594 | TMEM51        | -1.0521642   | 0.3151587  | -0.058879  | 0.8773769  | -0.16237381 |
| 11 | 3420433 | IL12RB1       | -0.752845    | 0.22324511 | -0.085143  | 0.3393546  | -0.34660283 |
| 11 | 4200176 | ZFP3          | -0.7567272   | 0.6798045  | 0.0835319  | 0.400701   | -0.26436052 |
| 11 | 5820056 | SERPINE6B     | -0.6972597   | 0.0569534  | -0.037081  | 0.30763403 | -0.24232954 |
| 11 | 6370553 | LAT2          | -0.8222327   | 0.30399096 | 0.0135109  | 0.43446338 | -0.18959615 |
| 11 | 7040181 | 2410008K03RIK | -0.6718154   | 0.627824   | -0.160607  | 0.22036425 | -0.43945658 |
| 11 | 1540154 | COBLL1        | -1.4085056   | 0.13500641 | -0.078981  | 0.5751112  | -0.4740254  |
| 11 | 1890440 | INPPL1        | -1.0961415   | 0.6849205  | 0.0065741  | 0.47439212 | -0.41050032 |
| 11 | 1990564 | TXNDC5        | -1.1300812   | 0.79023486 | -0.084986  | 0.28805238 | -0.6397091  |
| 11 | 5080326 | S100A6        | -3.4317393   | 1.6137261  | -0.207226  | 0.9710497  | -1.7487891  |
| 11 | 5670072 | INPPL1        | -1.146106    | 0.58783567 | 0.0143428  | 0.45482897 | -0.4295762  |
| 11 | 1470408 | CXCR5         | -1.5689836   | -0.1384336 | -0.110623  | 0.24090374 | -0.74909383 |
| 11 | 4230348 | CEBPB         | -0.8742819   | 0.3177172  | -0.255484  | 0.38370425 | -0.35665476 |
| 11 | 4730367 | IFI3          | -0.7022082   | 0.19617644 | -0.130323  | 0.37867236 | -0.16467972 |
| 11 | 6860543 | MAPRE2        | -1.2778932   | 0.3506472  | -0.113     | 0.18759856 | -0.62189656 |
| 11 | 50091   | CXCR5         | -1.5614064   | 0.00206366 | 0.0253804  | 0.29427794 | -0.5667293  |
| 11 | 1050092 | SERPINA3G     | -3.9786162   | 0.737345   | -0.208721  | 2.0292928  | -0.6722695  |
| 11 | 1410113 | UAP1L1        | -0.9322789   | 0.02803838 | -0.045141  | 0.24023601 | -0.2576184  |
| 11 | 1690768 | CCL5          | -6.6927257   | 0.6510022  | -0.030798  | 0.6216512  | -2.7222006  |
| 11 | 4150670 | ST3GAL6       | -2.3762949   | 0.2886797  | -0.1398    | 0.67604893 | -1.7296188  |
| 11 | 4570368 | ERRFI1        | -0.7992786   | 0.08407915 | -0.218891  | 0.6179204  | -0.02416804 |
| 11 | 6380209 | TBX21         | -3.0225856   | 0.46912214 | -0.136036  | 0.7369357  | -2.1200452  |
| 11 | 6380431 | RAB19         | -0.7842387   | 0.16501945 | -0.111713  | 0.30671763 | -0.15392525 |
| 11 | 450368  | RGS1          | -1.6685504   | 0.19300638 | -0.212263  | 0.6455933  | -0.39045298 |
| 11 | 1440040 | GARNL4        | -1.1035163   | 0.02289705 | -0.061363  | 0.73496705 | -1.1008164  |
| 11 | 1690475 | GBP3          | -0.8519365   | 0.0986696  | -0.25403   | 0.6430872  | -0.0259692  |
| 11 | 2100524 | THTPA         | -1.4835364   | -0.1296756 | 0.0362604  | 0.6157791  | -1.1457641  |
| 11 | 60553   | GBP3          | -0.6527522   | 0.21350572 | -0.273202  | 0.62268845 | -0.0069448  |
| 12 | 990682  | PSEN2         | -0.9731697   | -0.402585  | 0.1174789  | 0.36149824 | -0.04562488 |
| 12 | 510338  | 1810015A11RIK | -0.9157328   | -0.0261331 | 0.0967451  | 1.15556511 | 0.124860235 |
| 12 | 510474  | LIGALS3       | -2.122525412 | 0.3897019  | -0.0198138 | 1.7712147  | 0.009741766 |
| 12 | 1240546 | BCL2L1        | -0.6013047   | -0.1659413 | -0.023679  | 0.53096354 | 0.22420967  |
| 12 | 1580044 | VARS          | -1.00154     | 0.01059109 | 0.1175132  | -0.1318501 | 0.19268878  |
| 12 | 1940482 | HPRT1         | -0.9301558   | -0.3469166 | -0.376288  | 0.07989012 | 0.3292778   |
| 12 | 2000398 | HBA-A1        | -2.8816464   | -1.1949313 | 0.6514995  | 1.3988298  | 0.7524203   |
| 12 | 2340349 | ALDH2         | -0.7685452   | 0.09549547 | -0.414444  | 0.88186127 | 0.9190573   |
| 12 | 2470315 | ACOT7         | -1.7597207   | -0.6384506 | -0.0115    | 0.41623974 | 0.28506926  |
| 12 | 2490044 | CRTAM         | -0.7121865   | -0.1007578 | -0.072718  | 0.3216934  | 0.4541041   |
| 12 | 2600240 | IL3RA         | -1.1276588   | 0.02290699 | 0.1386972  | 0.03001805 | 0.1973804   |

|    |         |               |             |             |           |            |             |
|----|---------|---------------|-------------|-------------|-----------|------------|-------------|
| 12 | 4610373 | IRF8          | -1.2045448  | -0.0566713  | -0.348639 | 0.46020573 | 0.72978264  |
| 12 | 4890162 | MFS010        | -1.1696024  | -0.0948689  | 0.0700103 | 0.4497516  | -0.15853187 |
| 12 | 5130372 | SNCA          | -0.6388399  | -0.3046654  | 0.1941647 | 0.989606   | 0.6435047   |
| 12 | 5290333 | ME2           | -0.5420332  | -0.1676381  | 0.0001279 | 0.7155484  | 0.30628622  |
| 12 | 5290561 | PRR13         | -1.0919147  | -0.0478929  | -0.044221 | 0.11178415 | -0.00054477 |
| 12 | 6250619 | TNFSF14       | -1.6750062  | -0.4389952  | -0.143651 | 0.3990472  | 0.51335937  |
| 12 | 6420215 | GS02          | -1.3073226  | -0.1769822  | 0.1043409 | 0.09945016 | 0.10898194  |
| 12 | 7050717 | VVA5A         | -0.9217248  | -0.3938511  | 0.0121657 | 0.6104084  | 0.19719541  |
| 12 | 7100338 | ILZRB         | -1.5271692  | -0.2508189  | 0.0929132 | 0.7676064  | -0.28076372 |
| 12 | 7610392 | ACOT7         | -1.0883043  | -0.4221861  | 0.2362604 | 0.9323963  | -0.22470073 |
| 12 | 70753   | CTNNA1        | -0.9026763  | -0.2181727  | -0.08686  | 0.334281   | 0.47542262  |
| 12 | 240373  | D14ERTD449E   | -0.72178965 | 0.1272814   | -0.054027 | 0.58330745 | 0.35121864  |
| 12 | 670403  | HBB-81        | -1.4235101  | -0.4558943  | 0.8178855 | 1.2505786  | 0.8641423   |
| 12 | 1070487 | NLRX1         | -0.8430908  | -0.02772594 | -0.109494 | 0.35748756 | 0.47757325  |
| 12 | 1107170 | NFE2          | -0.7725834  | -0.4134155  | 0.0708085 | 0.8829693  | 0.657127    |
| 12 | 1400377 | SYPL          | -1.3172567  | -0.1886001  | 0.1588695 | 0.14958896 | 0.7437655   |
| 12 | 2060669 | SYPL          | -1.2277737  | -0.2305906  | -0.032308 | 0.4388202  | 0.9796422   |
| 12 | 3460296 | ANXA2         | -3.7256997  | -1.235061   | 0.2783055 | 0.4741966  | -0.11955031 |
| 12 | 6840392 | ACOT7         | -1.8707272  | -0.7478653  | -0.043299 | 0.35495338 | 0.37590876  |
| 12 | 6380164 | CLDND1        | -0.9617169  | -0.6474133  | 0.1613775 | 0.40782332 | -0.14917277 |
| 12 | 7150528 | CDKN2C        | -1.2668574  | -0.5963473  | 0.0028661 | 0.5684591  | 0.777676396 |
| 12 | 730129  | ACOT7         | -2.2621589  | -0.9511862  | 0.0340236 | 0.08448366 | 0.42683828  |
| 12 | 2000338 | LUZP1         | -1.0231282  | -0.690319   | 0.0492488 | 0.43569735 | 0.16544275  |
| 12 | 3130707 | PDGFB         | -1.6172872  | -1.1232256  | 0.9759956 | 1.5055923  | -0.03237513 |
| 12 | 6330377 | GADD45G       | -0.4834442  | -0.6504151  | 0.2124933 | 0.5417737  | -0.11042683 |
| 12 | 1570564 | CD160         | -1.5598472  | -0.7504547  | 0.0945853 | 0.21968877 | 0.62847364  |
| 12 | 1780619 | RAB32         | -0.5159394  | -0.4596837  | 0.0220303 | 0.6317199  | 0.45054471  |
| 12 | 4070142 | GADD45G       | -0.8138824  | -0.792621   | 0.2072534 | 0.39741904 | 0.006910993 |
| 12 | 5290279 | HMBG2         | -0.8739579  | -0.4607145  | 0.2598586 | 0.38661838 | 0.48023522  |
| 12 | 5420224 | TFDP1         | -1.3765826  | -0.644336   | 0.1756398 | 0.09653757 | 0.51492566  |
| 12 | 2260059 | BMP7          | -1.1678914  | -1.1461341  | -0.011877 | 0.24930781 | 0.16221945  |
| 12 | 5340577 | XDH           | -0.7542729  | -0.954174   | 1.01463   | 0.8794042  | -0.09123938 |
| 12 | 2350368 | MFS02         | -0.9559146  | -0.9704826  | 0.3073699 | 0.30687058 | 0.1592429   |
| 12 | 4210192 | EHD4          | -0.8455741  | -0.8071548  | -0.067723 | 0.20731343 | 0.3623373   |
| 12 | 2230309 | FCER1G        | -1.5579079  | -0.3966765  | -0.072562 | 1.6778316  | 0.016574029 |
| 12 | 6220386 | ITFM1         | -0.5278961  | -0.2522052  | 0.0961878 | 0.4755349  | -0.2044087  |
| 12 | 4390538 | ITM2A         | -1.5941801  | -1.5401962  | 0.1775825 | 0.436396   | 1.0458014   |
| 12 | 2510468 | FIBCD11       | -0.7897431  | -0.7550026  | 0.2266981 | 0.03427107 | 0.25663447  |
| 12 | 3850202 | XCL1          | -3.618219   | -2.0684716  | 1.1617788 | 0.4072394  | 2.2144942   |
| 12 | 4200204 | SH3BP2        | -1.0246757  | -0.7116935  | 0.163162  | 0.09648942 | 0.792348    |
| 12 | 4250403 | TOP2A         | -2.157228   | -1.7767743  | 0.3367526 | 0.12724786 | 0.95820135  |
| 12 | 4250711 | HIST1H2AF     | -2.0447493  | -1.044982   | 1.1163139 | 1.8292366  | 1.2663      |
| 12 | 4480333 | PPIC          | -1.5734206  | -3.1179645  | 0.4127669 | 0.10515865 | 0.15715249  |
| 12 | 4610129 | HIST1H2AN     | -2.2406652  | -1.1368979  | 1.025893  | -0.032911  | 1.0346707   |
| 12 | 6060379 | CDC2A         | -1.451523   | -1.2547721  | 0.3065058 | 0.03141673 | 1.2626917   |
| 12 | 7400215 | BIRC5         | -1.9634094  | -1.6979129  | 0.4349198 | 0.12155451 | 1.1449862   |
| 12 | 70546   | HIST1H2AG     | -2.0554554  | -1.2120196  | 0.6769035 | 0.17539223 | 1.3571525   |
| 12 | 110039  | HIST2H2AB     | -1.664143   | -0.785445   | 0.7084205 | -0.0856052 | 1.2052323   |
| 12 | 110706  | PPIC          | -1.0232191  | -1.6982138  | 0.4039708 | 0.32471332 | 0.12750761  |
| 12 | 150019  | LITAF         | -1.5993534  | -1.5501829  | 0.1455315 | 0.2975369  | 1.7973932   |
| 12 | 770162  | E2F2          | -1.1159225  | -1.0952038  | 0.8325691 | 0.1275882  | 0.90313846  |
| 12 | 780475  | PRC1          | -2.1105464  | -1.5699309  | 0.7193904 | 0.24640936 | 1.5137392   |
| 12 | 1050170 | CDCA3         | -1.7716234  | -1.2330785  | 1.1001537 | 0.01629733 | 1.4709579   |
| 12 | 1090327 | H2AFX         | -1.1018144  | -0.6077089  | -0.075624 | 0.05314143 | 1.0426824   |
| 12 | 1240446 | BIRC5         | -2.4075906  | -2.0983467  | 0.7741442 | 0.02884809 | 1.7165598   |
| 12 | 1470341 | HIST1H2AH     | -2.275559   | -1.2953122  | 0.8092663 | 0.22612578 | 1.086515    |
| 12 | 1500491 | NUSAP1        | -2.591729   | -2.0765285  | 0.6687306 | -0.1088957 | 1.6238749   |
| 12 | 2000669 | PPA1          | -0.907247   | -0.7366502  | 0.0729282 | 0.23435684 | 1.1588833   |
| 12 | 2100026 | TYMS          | -1.4361969  | -0.71171215 | 0.2410098 | 0.06262621 | 0.8123017   |
| 12 | 2140136 | LOC100047934  | -1.5567126  | -0.7016844  | 0.2796417 | 0.00071217 | 1.4887694   |
| 12 | 2190164 | CCNB1         | -1.1598772  | -0.9189021  | 0.3456282 | 0.02529775 | 0.96379364  |
| 12 | 2260010 | PSAT1         | -0.9052368  | -0.9706602  | 0.0339059 | 0.28632548 | 1.2207346   |
| 12 | 2810612 | BIRC5         | -1.8314174  | -1.5281113  | 0.3457334 | 0.18959764 | 1.1833174   |
| 12 | 2800300 | PBK           | -1.8226566  | -1.4440981  | 0.8214402 | 0.11755432 | 1.9240046   |
| 12 | 3130609 | HIST1H2AK     | -2.2369103  | -1.3016876  | 0.914618  | 0.24675743 | 1.2009321   |
| 12 | 3290437 | MCM6          | -0.9450043  | -0.7633171  | 0.1396371 | 0.21144295 | 1.2446214   |
| 12 | 3520717 | HIST1H2AD     | -2.0352352  | -1.1972477  | 1.0546601 | 0.29756027 | 1.2396905   |
| 12 | 3830735 | TYMS-PS       | -1.490701   | -0.6577432  | 0.2634034 | -0.0006138 | 1.4126583   |
| 12 | 3990477 | TPH1          | -1.1515313  | -0.5247411  | 0.2501124 | 0.05995714 | 1.0873128   |
| 12 | 4560397 | UHRF1         | -1.821557   | -1.6830806  | 1.1593695 | 0.02212613 | 1.9089408   |
| 12 | 6100184 | KLRB1C        | -0.6777135  | -0.637663   | -0.033766 | 0.6612918  | 1.1356187   |
| 12 | 6380095 | ADK           | -1.0286623  | -1.1179284  | 0.4758468 | -0.012098  | 1.318783    |
| 12 | 6400348 | RRM1          | -1.0433565  | -0.8549442  | 0.2326027 | -0.0159591 | 1.2470154   |
| 12 | 6510253 | HIST1H2AO     | -1.6538959  | -0.8193444  | 1.0748979 | 0.2723382  | 1.3875704   |
| 12 | 6550164 | E2F2          | -0.8242882  | -1.0811796  | 0.8687724 | 0.24912517 | 1.1130025   |
| 12 | 6560204 | TNFRSF21      | -0.8350597  | -0.5498024  | 0.09904   | 0.5060997  | 0.92965996  |
| 12 | 7100301 | 2810417H13RIK | -2.0034602  | -1.5856661  | 1.0510473 | 0.13781138 | 2.2410605   |
| 12 | 7550156 | CCNB1         | -0.8542936  | -0.7285548  | 0.3357866 | -0.0514457 | 0.9554938   |
| 12 | 160240  | SCAMP1        | 0.01320697  | -1.0684391  | 0.0614183 | -0.0487184 | 0.6757116   |
| 12 | 240348  | CHN2          | -0.8342466  | -0.7905526  | 0.0378148 | 0.9414832  | 1.4236475   |
| 12 | 840673  | LMNB1         | -1.0762743  | -0.8380178  | 0.5737065 | 0.06115005 | 1.335033    |
| 12 | 1190201 | ANLN          | -1.0054375  | -0.9049031  | 0.7014079 | 0.15123756 | 1.1347903   |
| 12 | 3440725 | RRM2          | -1.0448292  | -0.8526796  | 0.5605371 | -0.028993  | 1.2005897   |
| 12 | 3780291 | PKM2          | -0.2082257  | -1.5569786  | 0.2557048 | 0.09486808 | 1.26638     |
| 12 | 4210246 | KIF22         | -1.1530638  | -1.2688384  | 1.0925534 | -0.0263959 | 1.4289429   |
| 12 | 5560646 | RRM2          | -1.2211843  | -0.9962605  | 0.7197059 | 0.08258699 | 1.6164974   |
| 12 | 5290427 | PLK1          | -1.0634757  | -1.2261145  | 0.8789578 | 0.04305518 | 1.6103097   |
| 12 | 1410189 | MADL1         | -0.8570808  | -0.4143163  | 0.3345359 | 0.0424445  | 1.0720571   |
| 12 | 4210072 | LOC100045304  | -0.0911443  | -1.12129645 | 0.3798784 | -0.0490675 | 1.2458103   |
| 12 | 6200367 | NCAPH         | -1.2347803  | -1.3917984  | 1.006512  | 0.06217913 | 1.6786662   |
| 12 | 60369   | E2F1          | -1.426535   | -0.8412483  | 0.946645  | -0.0498445 | 1.6921204   |
| 12 | 240450  | HIST2H2AC     | -1.2278252  | -0.4434526  | 0.8455102 | 0.08603879 | 1.2684923   |
| 12 | 3990243 | MCM6          | -0.640049   | -0.4988052  | 0.5658465 | -0.1785563 | 0.79001133  |
| 12 | 7400142 | TK1           | -1.5462611  | -0.771556   | 1.0056343 | 0.0445016  | 1.8253162   |
| 12 | 3460037 | FEN1          | -0.7726519  | -0.6435661  | 0.3003812 | 0.08116285 | 1.3427945   |
| 12 | 7570278 | CLSPN         | -0.7914223  | -1.2355102  | 0.9195383 | 0.04262672 | 1.5661677   |
| 12 | 670500  | FIGLN1        | -1.5120795  | -1.1117454  | 1.0296631 | 0.04757351 | 2.2664912   |
| 12 | 3170494 | D17H6S56E-5   | -0.9499862  | -0.1077704  | 0.2554698 | 0.3388715  | 0.98876756  |
| 12 | 3890022 | NDRL          | -0.3966266  | -1.4419299  | 0.369229  | -0.0185986 | 1.7029529   |
| 12 | 4920148 | CDCA3         | -0.9136294  | -0.7537358  | 0.7129967 | 0.03877658 | 1.4569873   |
| 12 | 1770612 | MCM2          | -0.8915938  | -0.5886559  | 0.4669901 | 0.02958543 | 1.4260246   |
| 12 | 2360189 | KIF11         | -0.9447571  | -0.8125672  | 0.7747464 | 0.08234409 | 1.5322081   |
| 12 | 3310196 | CDCA5         | -0.742332   | -0.699049   | 0.3077358 | 0.09679332 | 1.4903071   |
| 12 | 4610722 | CDC20         | -1.0163532  | -0.8385389  | 0.8324314 | 0.03216901 | 1.6036934   |
| 12 | 7200270 | CHAF1B        | -0.6964932  | -0.1066535  | 0.3508559 | -0.0390247 | 0.75103635  |
| 12 | 20064   | CAPG          | -1.0373274  | 0.16989125  | 0.0099593 | 0.13790333 | 1.1986092   |
| 12 | 2680010 | 3000004C01RIK | -1.0146477  | -0.8416767  | 0.7148934 | 0.00013468 | 1.7859044   |
| 12 | 4220326 | MCM10         | -1.7079526  | -1.2191925  | 1.6405046 | 0.07542865 | 2.3984084   |
| 12 | 6290133 | ENDOD1        | -3.0986817  | -0.5052866  | 0.3651607 | -0.0063565 | 1.9671836   |
| 12 | 3180685 | CENPH         | -0.5143716  | -0.3925178  | 0.5493878 | -0.0740638 | 0.70442706  |
| 12 | 4230717 | GALK1         | -0.9488193  | -0.390287   | 0.1080154 | 0.15161476 | 0.57091343  |
| 12 | 3310132 | SWAP70        | -1.1983396  | 0.08309604  | -0.059453 | 0.219015   | 0.7304614   |
| 12 | 5220440 | LOC100047651  | -1.2827828  | -0.1413969  | 0.2362998 | 0.00490397 | 0.6851482   |
| 12 | 7050138 | GFOD1         | -0.9732739  | -0.0489872  | 0.0007252 | 0.0743428  | 0.6632452   |
| 12 | 7050433 | LPXN          | -1.2819521  | 0.11287406  | -0.718172 | 0.3058022  | -0.28306682 |
| 12 | 10630   | MRPL52        | -0.7656061  | 0.39050207  | -0.14036  | 0.15777558 | -0.1112823  |
| 12 | 670204  | GIMAP7        | -1.2659446  | 0.5071645   | -0.409543 | 0.56171185 | -0.28956427 |
| 12 | 940129  | 4930486L24RIK | -1.0602587  | 0.38727254  | -0.078282 | 0.35823828 | -0.02173948 |
| 12 | 2100689 | UNC93B1       | -1.2145232  | 0.37229782  | -0.535025 | 0.27017352 | -0.17742518 |
| 12 | 4880138 | CD44          | -2.3840535  | 0.45327124  | -0.686747 | 0.2983284  | -0.16057587 |
|    |         |               |             |             |           |            |             |



|    |         |           |            |            |           |            |             |
|----|---------|-----------|------------|------------|-----------|------------|-------------|
| 14 | 520072  | H2-EB1    | -2.4750953 | 1.6946348  | -1.473489 | 0.69848496 | 0.010201382 |
| 14 | 780315  | LOC641240 | -2.4132752 | 1.5944964  | -1.384942 | 0.6980989  | 0.08465149  |
| 14 | 1230341 | BHLHB2    | -1.9044964 | 0.1715965  | -0.642711 | 0.5272908  | -0.04714324 |
| 14 | 1340148 | PLSCR1    | -0.6358942 | 0.32364956 | -0.242106 | 0.4391541  | 0.14608346  |
| 14 | 1940722 | CASP1     | -3.086959  | 1.9996727  | -1.636938 | 0.13193846 | 0.60856575  |
| 14 | 2510561 | MYL4      | -1.5307268 | 0.3244423  | -0.290115 | 0.2625834  | 0.24217679  |
| 14 | 4050112 | GLRX      | -0.6505902 | 0.36185995 | -0.870185 | 0.15022142 | 0.04454369  |
| 14 | 4290072 | BC021614  | -0.704818  | 0.16994987 | -0.131143 | 0.3114001  | 0.08121721  |
| 14 | 4900754 | H2-DMB1   | -0.9764614 | 0.75561696 | -0.606823 | 0.2831886  | 0.1966451   |
| 14 | 5860435 | H2-AB1    | -1.7752495 | 1.5075976  | -1.109511 | 0.6336766  | -0.02063688 |
| 14 | 6520598 | SAS       | -1.0721793 | 0.825757   | -0.410674 | 0.06756089 | -0.07817687 |
| 14 | 7100577 | AXL       | -1.4257165 | 0.20108071 | -0.313653 | 0.3562797  | 0.27729142  |
| 14 | 7560338 | ASS1      | -1.0233951 | 0.64011866 | -0.069469 | -0.0016077 | 0.32440454  |
| 14 | 670463  | UBLCP1    | -0.8792934 | 0.14241102 | -0.134276 | 0.10687156 | 0.15382534  |
| 14 | 2190056 | MDFIC     | -0.4804679 | 0.5208581  | -0.078208 | -0.1001019 | -0.0952549  |
| 14 | 4730392 | SWAP70    | -1.1193863 | 0.28116643 | -0.007144 | -0.2119041 | 0.3320802   |
| 14 | 110192  | PKIG      | -0.8535621 | 0.20600891 | -0.260617 | 0.0187409  | 0.38000498  |
| 14 | 2510037 | ALAD      | -1.1839281 | 0.16690315 | -0.215419 | 0.13361987 | 0.36033797  |
| 14 | 6280504 | MED7      | -1.1732823 | 0.23534875 | -0.126612 | 0.01022214 | 0.50247747  |
| 14 | 7150500 | CCL4      | -1.6416757 | 0.33137903 | -0.619937 | 0.14049253 | 1.1512742   |
| 14 | 1770592 | NUAK2     | -0.6504894 | 0.67898864 | -0.624883 | 0.48470137 | -0.15236588 |
| 14 | 6880379 | P2RY14    | -0.7507824 | 0.8102004  | -0.562656 | 0.25020885 | -0.0969725  |
| 14 | 60050   | INSL6     | -1.1784225 | 1.2816058  | -0.872524 | 0.06866918 | 0.5761647   |
| 14 | 5290017 | CASP4     | -1.1470085 | 1.3319254  | -0.555609 | 0.21224393 | 1.1848031   |
| 14 | 6940184 | CCL4      | -2.9095013 | 0.27327687 | -0.244272 | 0.06468661 | 1.4883376   |

## References and Notes

1. D. L. Mueller, Mechanisms maintaining peripheral tolerance. *Nat Immunol* **11**, 21 (2010).
2. R. H. Schwartz, T cell anergy. *Annu Rev Immunol* **21**, 305 (2003).
3. S. Choi, R. H. Schwartz, Molecular mechanisms for adaptive tolerance and other T cell anergy models. *Semin Immunol* **19**, 140 (2007).
4. F. Ramsdell, B. J. Fowlkes, Maintenance of in vivo tolerance by persistence of antigen. *Science* **257**, 1130 (1992).
5. B. Rocha, C. Tanchot, H. Von Boehmer, Clonal anergy blocks in vivo growth of mature T cells and can be reversed in the absence of antigen. *J Exp Med* **177**, 1517 (1993).
6. C. Ohlen *et al.*, CD8(+) T cell tolerance to a tumor-associated antigen is maintained at the level of expansion rather than effector function. *J Exp Med* **195**, 1407 (2002).
7. J. Morimoto *et al.*, Induction of tolerance in CD8+ T cells to a transgenic autoantigen expressed in the liver does not require cross-presentation. *J Immunol* **178**, 6849 (2007).
8. R. M. Teague *et al.*, Interleukin-15 rescues tolerant CD8+ T cells for use in adoptive immunotherapy of established tumors. *Nat Med* **12**, 335 (2006).
9. R. M. Teague *et al.*, Peripheral CD8+ T cell tolerance to self-proteins is regulated proximally at the T cell receptor. *Immunity* **28**, 662 (2008).
10. K. M. Williams, F. T. Hakim, R. E. Gress, T cell immune reconstitution following lymphodepletion. *Semin Immunol* **19**, 318 (2007).
11. L. Hayflick, P. S. Moorhead, The serial cultivation of human diploid cell strains. *Exp Cell Res* **25**, 585 (1961).
12. E. J. Wherry *et al.*, Molecular signature of CD8+ T cell exhaustion during chronic viral infection. *Immunity* **27**, 670 (2007).
13. M. Quigley *et al.*, Transcriptional analysis of HIV-specific CD8+ T cells shows that PD-1 inhibits T cell function by upregulating BATF. *Nat Med* **16**, 1147 (2010).
14. L. Baitsch *et al.*, Exhaustion of tumor-specific CD8 T cells in metastases from melanoma patients. *J Clin Invest* **121**, 2350 (2011).
15. F. Macian *et al.*, Transcriptional mechanisms underlying lymphocyte tolerance. *Cell* **109**, 719 (2002).
16. M. Murga *et al.*, Mutation of E2F2 in mice causes enhanced T lymphocyte proliferation, leading to the development of autoimmunity. *Immunity* **15**, 959 (2001).
17. S. D. Blackburn *et al.*, Coregulation of CD8+ T cell exhaustion by multiple inhibitory receptors during chronic viral infection. *Nat Immunol* **10**, 29 (2009).

18. J. F. Grosso *et al.*, LAG-3 regulates CD8<sup>+</sup> T cell accumulation and effector function in murine self- and tumor-tolerance systems. *J Clin Invest* **117**, 3383 (2007).
19. M. Safford *et al.*, Egr-2 and Egr-3 are negative regulators of T cell activation. *Nat Immunol* **6**, 472 (2005).
20. Y. Yin *et al.*, PAC1 phosphatase is a transcription target of p53 in signalling apoptosis and growth suppression. *Nature* **422**, 527 (2003).
21. A. M. Intlekofer *et al.*, Effector and memory CD8<sup>+</sup> T cell fate coupled by T-bet and eomesodermin. *Nat Immunol* **6**, 1236 (2005).
22. E. L. Pearce *et al.*, Control of effector CD8<sup>+</sup> T cell function by the transcription factor Eomesodermin. *Science* **302**, 1041 (2003).
23. W. E. Thierfelder *et al.*, Requirement for Stat4 in interleukin-12-mediated responses of natural killer and T cells. *Nature* **382**, 171 (1996).
24. H. Guo, N. T. Ingolia, J. S. Weissman, D. P. Bartel, Mammalian microRNAs predominantly act to decrease target mRNA levels. *Nature* **466**, 835 (2010).
25. P. P. Medina, M. Nolde, F. J. Slack, OncomiR addiction in an in vivo model of microRNA-21-induced pre-B-cell lymphoma. *Nature* **467**, 86 (2010).
26. P. J. Ebert *et al.*, An endogenous positively selecting peptide enhances mature T cell responses and becomes an autoantigen in the absence of microRNA miR-181a. *Nat Immunol* **10**, 1162 (2009).
27. Q. J. Li *et al.*, miR-181a is an intrinsic modulator of T cell sensitivity and selection. *Cell* **129**, 147 (2007).
28. I. Yusuf, D. A. Fruman, Regulation of quiescence in lymphocytes. *Trends Immunol* **24**, 380 (2003).
29. B. R. Cairns, The logic of chromatin architecture and remodelling at promoters. *Nature* **461**, 193 (2009).
30. S. Datta, N. Sarvetnick, Lymphocyte proliferation in immune-mediated diseases. *Trends Immunol* **30**, 430 (2009).
31. R. J. Jones *et al.*, Induction of graft-versus-host disease after autologous bone marrow transplantation. *Lancet* **1**, 754 (1989).
32. P. Du, W. A. Kibbe, S. M. Lin, lumi: a pipeline for processing Illumina microarray. *Bioinformatics* **24**, 1547 (2008).
33. G. K. Smyth, V. C. R. Gentleman, S. Dudoit, R. Irizarry, W. Huber, Ed. (Springer, New York, 2005), pp. 397–420.
34. A. Reiner, D. Yekutieli, Y. Benjamini, Identifying differentially expressed genes using false discovery rate controlling procedures. *Bioinformatics* **19**, 368 (2003).
35. K. Y. Yeung, D. R. Haynor, W. L. Ruzzo, Validating clustering for gene expression data. *Bioinformatics* **17**, 309 (2001).
36. A. I. Saeed *et al.*, TM4: a free, open-source system for microarray data management and analysis. *Biotechniques* **34**, 374 (2003).

37. V. K. Mootha *et al.*, PGC-1alpha-responsive genes involved in oxidative phosphorylation are coordinately downregulated in human diabetes. *Nat Genet* **34**, 267 (2003).
38. A. Subramanian *et al.*, Gene set enrichment analysis: a knowledge-based approach for interpreting genome-wide expression profiles. *Proc Natl Acad Sci U S A* **102**, 15545 (2005).
39. C. D. Surh, J. Sprent, Homeostatic T cell proliferation: how far can T cells be activated to self-ligands? *J Exp Med* **192**, F9 (2000).
40. S. Debernardi *et al.*, MicroRNA miR-181a correlates with morphological sub-class of acute myeloid leukaemia and the expression of its target genes in global genome-wide analysis. *Leukemia* **21**, 912 (2007).
41. A. R. Fragoso *et al.*, Essential Role for Mir-181a1/b1 In T-Cell Acute Lymphoblastic Leukemia. *ASH Annual Meeting Abstracts* **116**, 470 (2010).
42. K. M. Murphy, B. Stockinger, Effector T cell plasticity: flexibility in the face of changing circumstances. *Nat Immunol* **11**, 674 (2010).
